# Supplementary material for: Polymicrobial detection and salivary metabolomics of children with early childhood caries
Source: PeerJ. 2025 May 6;13:e19399. doi: 10.7717/peerj.19399 (PMC12063607; doi:10.7717/peerj.19399)
Supplement: Supplemental Information 1 [file peerj-13-19399-s001.xlsx]

## Sheet: Questionnaire
Group	Name	Gender	Age（y）	Whether the mother has caries experience	Mode of delivery	Birth weight	Feeding patterns within 6 months of birth	Age of starting to brush teeth	Brushing teeth everyday	Frequency of brushing	Duration of each brushing	Use of fluoride toothpaste	Frequency of sugary drinks or food	Intake of foods before bedtime (after brushing)	dmft
ECC	***	女	4.5	No	Spontaneous labor	6.9	breast feeding only	2	Yes	1 times/day	≥ 3 minutes	No	≤ 1 times/week	≤ 1 times/week	15
ECC	***	男	5	No	Cesarean section	7.6	formula feeding only	1	No	1 times/day	< 3 minutes	Yes	≤ 1 times/week	≤ 1 times/week	10
ECC	***	男	4.25	Yes, untreated	Cesarean section	7.8	breast feeding mainly	1	No	1 times/day	< 3 minutes	Yes	≤ 1 times/week	≤ 1 times/week	14
CF	***	男	4	Yes, treated	Spontaneous labor	6.7	breast feeding mainly	0.5	Yes	1 times/day	< 3 minutes	Yes	≤ 1 times/week	≤ 1 times/week	0
CF	***	男	4.91	Yes, untreated	Spontaneous labor	6.3	formula and breast feeding equal	0.5	Yes	≥ 2 times/day	< 3 minutes	Yes	≤ 1 times/week	≤ 1 times/week	0
ECC	***	男	3.91	Yes, untreated	Spontaneous labor	6.4	formula and breast feeding equal	3	Yes	≥ 2 times/day	< 3 minutes	Yes	≤ 1 times/week	≤ 1 times/week	6
CF	*	男	5.33	Yes, treated	Spontaneous labor	5.4	breast feeding only	0.5	Yes	≥ 2 times/day	< 3 minutes	Yes	≤ 1 times/week	≤ 1 times/week	0
CF	**	女	6	Yes, treated	Cesarean section	7.8	breast feeding only	0.5	Yes	≥ 2 times/day	< 3 minutes	Yes	≤ 1 times/week	≤ 1 times/week	0
CF	***	男	4.83	Yes, untreated	Cesarean section	6.8	formula and breast feeding equal	1	Yes	≥ 2 times/day	≥ 3 minutes	Yes	≤ 1 times/week	≤ 1 times/week	0
CF	***	男	5.08	No	Cesarean section	5.4	formula and breast feeding equal	2	Yes	≥ 2 times/day	< 3 minutes	Yes	2-4 times/week	≤ 1 times/week	0
ECC	***	男	4.41	Yes, treated	Cesarean section	7	breast feeding only	3	Yes	≥ 2 times/day	< 3 minutes	Yes	2-4 times/week	≤ 1 times/week	15
ECC	***	女	4.17	Yes, treated	Cesarean section	6.5	breast feeding only	1	Yes	≥ 2 times/day	< 3 minutes	Yes	2-4 times/week	≤ 1 times/week	14
CF	***	男	5.08	No	Spontaneous labor	6.2	breast feeding only	2	Yes	≥ 2 times/day	< 3 minutes	Yes	2-4 times/week	≤ 1 times/week	0
CF	***	男	4.5	Yes, treated	Spontaneous labor	5.2	breast feeding only	0.5	Yes	≥ 2 times/day	< 3 minutes	Yes	2-4 times/week	≤ 1 times/week	0
CF	***	女	5	Yes, treated	Spontaneous labor	6	breast feeding only	1	Yes	≥ 2 times/day	< 3 minutes	Yes	2-4 times/week	≤ 1 times/week	0
CF	***	男	5.08	No	Cesarean section	39	breast feeding only	2	Yes	≥ 2 times/day	< 3 minutes	Yes	2-4 times/week	≤ 1 times/week	0
CF	*	女	4.58	Yes, treated	Cesarean section	7.2	breast feeding only	1	Yes	1 times/day	≥ 3 minutes	Yes	2-4 times/week	≤ 1 times/week	0
ECC	***	女	3.5	Yes, treated	Spontaneous labor	3.56	formula and breast feeding equal	1	No	1 times/day	< 3 minutes	No	≥ 1 times/day	≤ 1 times/week	8
ECC	***	女	4.83	Yes, treated	Spontaneous labor	6.5	breast feeding only	2	No	≥ 2 times/day	< 3 minutes	No	≥ 1 times/day	≤ 1 times/week	20
ECC	***	男	6	Yes, untreated	Spontaneous labor	5.6	breast feeding mainly	3	Yes	≥ 2 times/day	< 3 minutes	No	≥ 1 times/day	≤ 1 times/week	12
CF	***	男	4.67	Yes, treated	Cesarean section	7.6	breast feeding only	2	Yes	≥ 2 times/day	< 3 minutes	No	≥ 1 times/day	≤ 1 times/week	0
ECC	***	男	3.17	Yes, untreated	Spontaneous labor	7.2	formula and breast feeding equal	1	No	1 times/day	< 3 minutes	Yes	≥ 1 times/day	≤ 1 times/week	16
ECC	***	女	4.17	Yes, treated	Spontaneous labor	5.9	formula feeding only	2	Yes	≥ 2 times/day	< 3 minutes	Yes	≥ 1 times/day	≤ 1 times/week	15
ECC	***	男	4	Yes, untreated	Cesarean section	7	formula and breast feeding equal	1	Yes	≥ 2 times/day	< 3 minutes	Yes	≥ 1 times/day	≤ 1 times/week	14
CF	***	女	4.67	Yes, treated	Spontaneous labor	6.9	formula and breast feeding equal	2	Yes	≥ 2 times/day	< 3 minutes	Yes	≥ 1 times/day	≤ 1 times/week	0
ECC	***	女	5.67	No	Spontaneous labor	8.6	formula and breast feeding equal	0.5	Yes	≥ 2 times/day	< 3 minutes	Yes	≥ 1 times/day	≤ 1 times/week	11
ECC	***	男	3.75	Yes, treated	Cesarean section	6.7	formula feeding only	2	No	1 times/day	≥ 3 minutes	Yes	≥ 1 times/day	≤ 1 times/week	14
ECC	***	男	4	No	Spontaneous labor	6	breast feeding only	1	No	1 times/day	≥ 3 minutes	Yes	≥ 1 times/day	≤ 1 times/week	10
ECC	***	男	5.17	Yes, treated	Cesarean section	7.5	formula and breast feeding equal	3	Yes	≥ 2 times/day	≥ 3 minutes	Yes	≥ 1 times/day	≤ 1 times/week	16
CF	**	女	5	No	Spontaneous labor	8	formula and breast feeding equal	0.5	Yes	≥ 2 times/day	≥ 3 minutes	Yes	≥ 1 times/day	≤ 1 times/week	0
CF	**	男	6	No	Spontaneous labor	7.1	breast feeding only	0.5	Yes	≥ 2 times/day	≥ 3 minutes	Yes	≥ 1 times/day	≤ 1 times/week	0
CF	**	女	6	Yes, treated	Spontaneous labor	5.9	breast feeding only	1	Yes	≥ 2 times/day	≥ 3 minutes	Yes	≥ 1 times/day	≤ 1 times/week	0
ECC	***	男	4	No	Cesarean section	7.1	formula and breast feeding equal	4	No	1 times/day	< 3 minutes	No	2-4 times/week	2-4 times/week	6
ECC	**	男	5.25	Yes, treated	Spontaneous labor	6.8	breast feeding only	3	No	1 times/day	< 3 minutes	No	2-4 times/week	2-4 times/week	20
ECC	***	女	4.08	Yes, treated	Spontaneous labor	6.8	breast feeding only	3	No	1 times/day	< 3 minutes	No	2-4 times/week	2-4 times/week	10
CF	**	女	4	unknown	Cesarean section	5.8	breast feeding only	2	Yes	1 times/day	≥ 3 minutes	No	2-4 times/week	2-4 times/week	0
CF	***	女	2.25	No	Spontaneous labor	7.2	breast feeding only	1	No	1 times/day	< 3 minutes	Yes	2-4 times/week	2-4 times/week	0
ECC	***	女	6	Yes, treated	Cesarean section	4.38	breast feeding only	1	Yes	≥ 2 times/day	< 3 minutes	Yes	2-4 times/week	2-4 times/week	9
CF	***	女	3.83	Yes, untreated	Spontaneous labor	6.7	breast feeding only	2	Yes	≥ 2 times/day	< 3 minutes	Yes	2-4 times/week	2-4 times/week	0
CF	***	女	4.83	unknown	Cesarean section	5.6	formula and breast feeding equal	2	No	1 times/day	≥ 3 minutes	Yes	2-4 times/week	2-4 times/week	0
ECC	***	男	3.75	No	Cesarean section	7	formula feeding only	0.5	Yes	1 times/day	< 3 minutes	No	≥ 1 times/day	2-4 times/week	13
ECC	***	男	3.5	Yes, treated	Spontaneous labor	7	breast feeding only	2	Yes	1 times/day	< 3 minutes	No	≥ 1 times/day	2-4 times/week	12
ECC	***	男	3.91	Yes, untreated	Cesarean section	8	breast feeding only	3	No	1 times/day	< 3 minutes	Yes	≥ 1 times/day	2-4 times/week	14
ECC	***	女	4.08	Yes, untreated	Spontaneous labor	6	breast feeding only	2	No	1 times/day	< 3 minutes	Yes	≥ 1 times/day	2-4 times/week	15
ECC	***	女	4.75	Yes, treated	Spontaneous labor	6.3	formula and breast feeding equal	2	Yes	≥ 2 times/day	< 3 minutes	Yes	≥ 1 times/day	2-4 times/week	14
ECC	***	女	4.83	Yes, treated	Spontaneous labor	7.2	breast feeding only	2	Yes	≥ 2 times/day	< 3 minutes	Yes	≥ 1 times/day	2-4 times/week	12
ECC	***	女	3.75	Yes, untreated	Spontaneous labor	6.5	breast feeding only	3	No	1 times/day	< 3 minutes	No	2-4 times/week	≥ 1 times/day	14
ECC	***	男	4.91	Yes, untreated	Spontaneous labor	7.6	breast feeding only	2	Yes	1 times/day	< 3 minutes	Yes	2-4 times/week	≥ 1 times/day	15
CF	***	女	4	No	Spontaneous labor	5.6	formula and breast feeding equal	1	Yes	≥ 2 times/day	≥ 3 minutes	Yes	2-4 times/week	≥ 1 times/day	0
ECC	***	男	5.33	Yes, untreated	Cesarean section	7.4	breast feeding only	3	No	1 times/day	< 3 minutes	No	≥ 1 times/day	≥ 1 times/day	13
ECC	***	女	6.25	Yes, treated	Cesarean section	5.4	breast feeding only	3	No	1 times/day	< 3 minutes	No	≥ 1 times/day	≥ 1 times/day	14
ECC	***	男	4.41	No	Cesarean section	7.7	formula feeding only	4	No	1 times/day	< 3 minutes	Yes	≥ 1 times/day	≥ 1 times/day	11
ECC	***	男	4.25	Yes, treated	Spontaneous labor	6.9	breast feeding mainly	2	No	1 times/day	< 3 minutes	Yes	≥ 1 times/day	≥ 1 times/day	19

## Sheet: Fig. 1A
	S. wiggsiae+S. mutans	S. wiggsiae+S. sobrinus	S. wiggsiae+L. salivarius	S. wiggsiae+C. albicans	S. mutans+S. sobrinus	S. mutans+L. salivarius	S. mutans+C. albicans	S. sobrinus+L. salivarius	S. sobrinus+C. albicans	L. salivarius+C. albicans
ECC	0.933	0.947	0.818	0.875	0.909	0.929	1	0.909	1	0.833
CF	0.067	0.053	0.182	0.125	0.091	0.071	0	0.091	0	0.167

## Sheet: Fig. 1B
group	S. wiggsiae+S. mutans	S. wiggsiae+S. sobrinus	S. wiggsiae+L. salivarius	S. wiggsiae+C. albicans	S. mutans+S. sobrinus	S. mutans+L. salivarius	S. mutans+C. albicans	S. sobrinus+L. salivarius	S. sobrinus+C. albicans	L. salivarius+C. albicans
CF	0.05	0	0.27	0.05	0.05	0.05	0	0.09	0	0.09
ECC	0.41	0.53	0.84	0.47	0.31	0.38	0.16	0.59	0.44	0.5

## Sheet: qpcr
group	Universal 16s	Scardovia wiggsiae	Streptococcus mutans	Streptococcus salivarius	Streptococcus sobrinus	Streptococcus parasanguinis	Lactobacillus salivarius	Veillonella parvula	Candida albicans
0	9.01	35.905	41.43	19.49	36.91	25.9	19.56	21.64	38.66
0	12.19	27.86	39.4	23.76	39.94	27.32	24	24.64	41.93
0	9.82	25	29.13	19.19	39.32	27.44	40.4	22.65	39.93
0	8.44	40.96	37.64	19.39	41.13	29.27	18.77	21.72	44.59
0	8.56	38.51	40.98	18.67	38.49	34.14	19.67	20.91	38.49
0	10.43	38.78	35.71	18.84	41.25	26.73	42.35	20.9	39.19
0	9.91	35.29	35.7	20.58	37.88	28.05	22.79	25.09	48.03
0	11.55	NA	25.83	19.82	32.28	NA	22.29	22.05	42.7
0	8.53	32.05	43.38	21.93	40.5	25.3	20.94	25.76	31.95
0	13.38	NA	40.98	24.34	40.43	30.69	26.24	25.25	28.29
0	12.47	26.91	39.66	21.07	35.14	25.4	35.73	26.16	35.98
0	12.57	28.02	40.42	22.46	37.8	26.87	21.83	25.03	43.38
0	9.32	NA	35.37	19.82	30.68	26.13	39.35	27.92	37.13
0	9.83	28.83	38.62	21.38	37.675	24.59	20.09	23.49	44.82
0	9.17	NA	45.24	20.8	29.65	41.76	23.66	26.07	NA
0	9.18	30.7	39.88	20.31	36.91	27.85	20.7	22.54	NA
0	10.53	43.55	35.09	20.64	39.17	25.2	21.72	25.54	43.63
0	10.69	27.94	38.73	22.52	39.1	27.69	38.27	24.78	NA
0	9.27	28.59	36.58	19.71	42.27	23.36	41.45	22.71	44.01
0	9.91	28.96	38.03	18.77	36.32	25.72	19.88	23.18	35.39
0	11.1	47.87	38.51	25.23	38.05	24.02	36.77	23.44	35.68
0	11.63	30.23	38.04	24.52	37.12	26.04	37.69	27.07	35.62
1	9.12	26.32	36.34	20.89	38.88	22.75	19.75	19.55	41.83
1	9.44	27.37	38.47	22.45	28.31	24.6	20.53	23.93	30.98
1	8.98	28	31.23	22.8	22.45	29.69	17.26	17.69	NA
1	8.28	26.66	24.09	22.06	31.29	30.51	40.75	20.94	28.62
1	8.76	26.46	33.47	17.54	42.05	26.77	19.5	19.71	46.12
1	7.88	33.545	35.48	18.65	21.96	37.93	20.59	22.65	23.08
1	8.91	35.71	39.79	19.91	25.94	23.98	19.41	20.6	32.19
1	9.83	29.53	27.35	21.55	36.16	28.72	18.99	24.57	38.06
1	10.62	27.99	35.55	21.29	38	30.03	20.1	21.15	27.43
1	9.17	28.82	40.72	20.69	38.62	28.41	18.51	21.46	45.12
1	8.9	25.44	22.83	16.14	32.45	25.3	16.02	20.58	13.46
1	15.18	29.44	45.83	16.82	42.18	30.42	27.43	20.44	25.58
1	6.73	29.67	39.85	20.88	29.49	28.87	18.99	16.39	33.22
1	9.88	40.2133	34.6033	29.0667	34.7267	24.8033	28.6567	20.0433	32.5467
1	11.95	39	43.82	20.35	28.68	25.09	21.25	21.69	34.48
1	14.07	28.2	23.22	16.8	27.81	29.96	17.82	20.91	42.07
1	7.8	27.22	25.15	22.89	40.17	28.17	42.11	22.48	26.22
1	9.26	27.54	35.11	20.71	35.37	22.94	20.51	19.55	40.81
1	12.5467	30.23	36.1	29.8667	33.9267	24.1967	28.89	21.16	33.4867
1	10.29	28	26.63	18.96	29.14	36.14	22.35	20.97	37.31
1	9.34	33.29	36.68	20.24	24.06	24.99	20.92	21.85	29.9
1	8.63	32.32	35.22	19.58	22.43	16.92	18.17	18.95	23.98
1	7.82	27.72	13.17	24.08	27.35	29.77	23.15	22.83	NA
1	8.86	30.11	29.26	19.38	25.75	26.41	19.13	22.05	40.56
1	11.26	27.16	42.28	30.4	30.9	33.04	23.8	20.8	29.54
1	12.5267	22.49	36	17.45	21.82	26.53	17.89	20.85	23.63
1	8.81333	28.5967	26.9933	20.6233	26.2633	32.48	19.33	20.3267	28.0233
1	9.96333	26.12	26.9133	20.0233	38.39	36.9333	21.0667	25.18	39.15
1	12.5033	27.2633	41.0667	27.38	38.0433	31.4267	27.54	20.8867	NA
1	9.45667	26.74	26.9533	19.04	25.4733	28.5233	19.63	23.25	40.4267
1	11.29	29.23	36.53	20.75	41.97	34.51	18.45	21.98	30.34
1	9.57	27.01	36	19.84	35.92	26.08	18.94	22.92	42.07

## Sheet: MS identified metabolites
Metabolite name	Category1	Category2	HMDB ID	Alignment ID	Average Rt(min)	Average Mz	Adduct type	Mode	S/N average	dqh	syq	lhy	lyt	wxb	sjy	cmy	zmx	cwt	yy	swzy	yyx	ljy	zmz	scx	mjm	zmr	myy	csj	lyg	zmy	hjx	dyy	lxn	lyz	wws	kk	cg	fx	xr	yjy	tqw	cjy	ljr	xly	hch	lyx	zxy	zpp	yy_2
Urea	Amino Acid	Urea cycle; Arginine and Proline Metabolism	HMDB0000294	Meta_1	0.963	61.0403	[M+H]+	Positive	352.69	2467521202	3142245082	2.04878e+08	4860983624	2092588201	4614527960	3041970811	6.00311e+08	3720833527	1.96499e+08	8.23507e+08	3951860317	4761170903	5.72828e+08	6.82884e+08	1190003877	2673291184	4465997534	1299458167	2559917072	1302758014	552930251	1082721449	4087585834	2571566929	5799663721	1811464837	1327817475	2365488431	2634243779	3715594624	5131665370	2579553125	4441047545	1744036137	1660882097	1603465898	3089991590	1030332339	1825139603
2-Piperidinone	Xenobiotics	Natural Product/Food/Plant	HMDB0011749	Meta_11	1.976	100.076	[M+H]+	Positive	1295.18	663140101	2110952162	3310427479	1115528732	3168168480	1914809384	5.37443e+08	4.66531e+08	2137080157	3410592770	10460088838	8.33215e+08	3369830510	1540525916	1814180415	2154646529	3.30919e+08	7.84457e+08	2791823053	3378729524	5329642111	2593981992	2047137037	4.78014e+08	4.82087e+08	7.73118e+08	1.97051e+08	2252115195	8.94368e+08	1065183891	1099785930	651323459	4.01413e+08	1048003434	4383718774	4376646751	2219887278	2.85046e+08	7.07584e+08	3191674380
Phosphate	Energy	Oxidative Phosphorylation	HMDB0001429	Meta_236	0.852	96.9684	[M-H]-	Negative_NH4HCO3	18814.2	1983222511	2070183132	1910526431	2861934585	2640545625	2189979209	1521240393	9.38101e+08	1668450732	1949712425	2454708140	2051774378	2771390789	2010247494	1939738029	2777963989	2439517305	1881204866	3202261772	1441139015	2428356243	1876225779	1712269018	2940377128	3484614436	2193202034	902379490	1559424175	1541296126	1980848440	2098715821	2116060919	1789293341	2296622002	2337674092	2346752413	2996852363	2240794887	1700505236	3522375548
Betaine	Amino Acid	Glycine, Serine and Threonine Metabolism	HMDB0000043	Meta_25	1	118.086	[M+H]+	Positive	4184.38	2044941811	1372553549	7440362635	980682977	5767918024	2967790615	6.50212e+08	2692179169	1333330564	7313053235	6686280735	1050693682	2610522551	2194733780	2363455597	6436948359	1182364294	1362009973	7715190155	2926621095	2942198379	4883608551	2811005426	3.95297e+08	1947091916	5.49263e+08	198023200	3136353852	1121317475	1354709861	2413777865	4.79803e+08	1243115427	2716515119	5617354981	5513371788	4448486538	1.90558e+08	1703205109	5478643389
Ortophosphate	Unclassified	Unclassified		Meta_10	0.96	98.9845	[M+H]+	Positive	816.19	1160110120	1269405041	358058383	4.1285e+08	4.6096e+08	3.60519e+08	1033394164	5.68992e+08	9.78629e+08	3.49387e+08	6.36929e+08	4.7223e+08	8.05499e+08	1240673287	9.32589e+08	6.27391e+08	1053174597	1080967428	4.47523e+08	9.09236e+08	4.77253e+08	5.10676e+08	1030186477	1328237392	1216596852	9.30749e+08	8.13213e+08	9.61382e+08	9.93282e+08	6.67033e+08	9.40974e+08	1028401559	8.76815e+08	1090262604	5.23335e+08	3.47885e+08	3.24222e+08	1455891639	7.1344e+08	2.2507e+08
URIC ACID	Unclassified	Unclassified		Meta_401	1.04	167.02	[M-H]-	Negative_FA	4376.87	8.44695e+08	1029174317	1138752781	1944691843	366335319	1847223189	8.00983e+08	385065407	1209021544	1130844456	1202756119	1499307684	1816866425	5.05232e+08	534466377	1431344100	1140697029	1004894749	1506781810	1044502066	988350884	2.99513e+08	5.30783e+08	1526461222	6.69202e+08	1497203651	7.82683e+08	6.00826e+08	9.38943e+08	1050495977	1364209504	1328646510	5.64375e+08	1434742366	914940251	8.56724e+08	9.2164e+08	1332302071	9.6863e+08	1090444381
L-Phenylalanine	Amino Acid	Phenylalanine Metabolism	HMDB0000159	Meta_77	2.127	166.086	[M+H]+	Positive	1539.62	7.10301e+08	5.27809e+08	2034210591	1742971713	1515186466	1221073223	4.54349e+08	4.42692e+08	4.37463e+08	2277211206	1054388289	4.55896e+08	1054030301	8.94732e+08	1115006250	1172999670	5.96712e+08	3.79132e+08	1667119202	5.72714e+08	1438616113	9.14193e+08	8.58505e+08	5.48078e+08	2.34133e+08	5.60732e+08	6.41148e+07	9.24823e+08	3.10907e+08	4.48888e+08	475463999	4.93623e+08	3.71453e+08	5.06676e+08	1883190162	1885140678	6.4444e+08	2.72892e+08	6.75679e+08	6.44001e+08
Palmitic Acid (C16:0)	Lipid	Long Chain Fatty Acid	HMDB0000220	Meta_331	8.086	255.233	[M-H]-	Negative_NH4HCO3	8855.59	4.31945e+08	4.07573e+08	4.54174e+08	6.74654e+08	3.93499e+08	3.9211e+08	5.61186e+08	3.38522e+08	3.58765e+08	4.16544e+08	3.1006e+08	4.62226e+08	3.83959e+08	3.86486e+08	3.74914e+08	4.38495e+08	3.70611e+08	4.04349e+08	4.16925e+08	4.52275e+08	5.68674e+08	378613612	4.39244e+08	4.8135e+08	3.75972e+08	6.26285e+08	3.39238e+08	4.45674e+08	3.81184e+08	5.17434e+08	4.30411e+08	5.75133e+08	3.50338e+08	4.37548e+08	4.40329e+08	3.98742e+08	3.46432e+08	4.27497e+08	4.96462e+08	2.89233e+08
N-ACETYLNEURAMINATE	Unclassified	Unclassified		Meta_434	0.957	308.099	[M-H]-	Negative_FA	4648.24	226893244	3.76063e+08	1.60814e+08	2.84528e+08	2.80438e+08	5.52757e+08	1.62221e+08	1.31148e+08	2.72951e+08	1.51476e+08	3.25141e+08	3.14745e+08	5.53038e+08	1.00789e+08	1.08664e+08	3.63037e+08	2.66875e+08	2.75136e+08	4.09862e+08	2.76717e+08	2.73211e+08	3.94998e+08	3.24422e+08	1.70182e+08	2.26432e+08	1.62116e+08	8.81967e+07	3.4757e+08	1.64543e+08	1.95171e+08	3.57081e+08	1.46248e+08	2.82006e+08	3.96845e+08	4.66074e+08	4.88667e+08	3.1428e+08	1.27916e+08	1.8607e+08	3.03285e+08
Uric acid	Unclassified	Unclassified		Meta_80	1.036	169.036	[M+H]+	Positive	406.84	2.15487e+08	359432887	230831342	5.58678e+08	4.58667e+07	4.87401e+08	2.49581e+08	8.63029e+07	3.94191e+08	2.18444e+08	2.60214e+08	442703604	5.13397e+08	1.1549e+08	1.23981e+08	3.40974e+08	289059798	2.93529e+08	3.38642e+08	3.56425e+08	2.23698e+08	4.73758e+07	1.43257e+08	4.25735e+08	2.26357e+08	5.16617e+08	3.38477e+08	148591249	2.89686e+08	3.23962e+08	3.81942e+08	4.79587e+08	1.57051e+08	4.12262e+08	1.64616e+08	1.35037e+08	1.51119e+08	4.49426e+08	277960761	1.58888e+08
L-Proline	Amino Acid	Urea cycle; Arginine and Proline Metabolism	HMDB0000162	Meta_23	0.972	116.071	[M+H]+	Positive	585.99	4.72216e+08	3.2721e+08	2193749502	6.24257e+08	1140533856	6.83468e+08	2.67651e+08	4.33353e+08	4.79725e+08	2085750128	1311909126	9.1746e+08	6.46871e+08	5.46792e+08	6.17233e+08	9.62469e+08	7.71345e+08	2.17116e+08	1136076548	646020671	4.9119e+08	1746519152	9.80134e+08	3.89221e+08	7.43893e+08	2.1898e+08	3.99267e+07	1117783006	5.4695e+08	5.3036e+08	1334928263	1.88675e+08	5.7283e+08	1490359922	1852397668	2013855028	5.05916e+08	2.70193e+08	1207303312	5.0127e+08
L-Tyrosine	Amino Acid	Tyrosine Metabolism	HMDB0000158	Meta_92	1.251	182.081	[M+H]+	Positive	476.18	4.68405e+08	3.2626e+08	8.42789e+08	1035791562	8.88263e+08	3.95205e+08	2.46107e+08	3.82719e+08	2.13346e+08	8.93527e+08	6.20258e+08	4.66531e+08	4.78393e+08	5.37293e+08	6.64905e+08	5.53957e+08	4.62497e+08	1.77537e+08	737263739	3.64987e+08	5.42418e+08	7.64032e+08	4.88767e+08	3.04537e+08	1.62945e+08	2.57212e+08	4.36719e+07	5.65221e+08	2.18337e+08	310125017	3.92236e+08	2.28878e+08	2.74266e+08	3.95097e+08	9.40326e+08	1119720525	5.03012e+08	1.59929e+08	4.56477e+08	5.61763e+08
PHENYLETHANOLAMINE	Unclassified	Unclassified		Meta_27	2.127	120.081	[M-H2O+H]+	Positive	679.07	4.21471e+08	3.07892e+08	1226246511	1032723946	8.95141e+08	7.1686e+08	2.60755e+08	2.64943e+08	2.67591e+08	1349080697	6.56423e+08	2.70229e+08	6.30689e+08	5.45969e+08	6.66381e+08	7.09753e+08	3.58618e+08	2.23453e+08	9.88208e+08	3.41205e+08	8.66732e+08	5.40651e+08	5.0226e+08	3.24887e+08	1.36572e+08	3.28853e+08	3.72289e+07	5.47817e+08	1.85285e+08	263245321	280716698	2.84973e+08	2.23357e+08	2.98803e+08	1120642964	1116974753	3.82879e+08	1.5897e+08	4.01341e+08	3.89772e+08
N-Acetylneuraminic Acid	Carbohydrate	Amino sugar and Nucleotide sugar Metabolism	HMDB0000230	Meta_355	0.9	308.099	[M-H]-	Negative_NH4HCO3	9407.17	1.70128e+08	2.85494e+08	1.24108e+08	2.29272e+08	1.67965e+08	3.50754e+08	1.09537e+08	1.09213e+08	1.86476e+08	1.40686e+08	1.59256e+08	2.07664e+08	3.07125e+08	1.11559e+08	7.29905e+07	223448990	1.41834e+08	2.185e+08	2.19514e+08	2.01986e+08	2.36163e+08	2.30268e+08	2.62219e+08	9.93017e+07	1.08836e+08	1.10557e+08	4.95693e+07	2.55429e+08	9.75372e+07	1.40106e+08	2.20606e+08	1.11101e+08	1.80287e+08	2.592e+08	2.33965e+08	2.26424e+08	1.23119e+08	9.51791e+07	1.21774e+08	8.39924e+07
Stearic Acid (C18:0)	Lipid	Long Chain Fatty Acid	HMDB0000827	Meta_344	8.366	283.265	[M-H]-	Negative_NH4HCO3	6258.54	2.85114e+08	2.73745e+08	2.98015e+08	4.19075e+08	2.89974e+08	2.73798e+08	3.45782e+08	2.40324e+08	2.58405e+08	2.86603e+08	2.3754e+08	311285300	2.65797e+08	2.7896e+08	2.53353e+08	2.92872e+08	2.54117e+08	2.76762e+08	2.95086e+08	2.91266e+08	3.88915e+08	2.6398e+08	3.02413e+08	3.00862e+08	2.87753e+08	4.05679e+08	2.47373e+08	2.8181e+08	2.5845e+08	3.38236e+08	2.90487e+08	3.69561e+08	2.37367e+08	2.97332e+08	2.9366e+08	275635321	2.47812e+08	2.70775e+08	3.38871e+08	245216395
L-Leucine	Amino Acid	Leucine, Isoleucine and Valine Metabolism	HMDB0000687	Meta_41	1.578	132.102	[M+H]+	Positive	321.34	2.07518e+08	209361638	1429753848	4.69468e+08	5.16058e+08	4.88365e+08	1.19854e+08	1.09602e+08	1.27526e+08	1530859690	6.24708e+08	1.1301e+08	278652820	3.15191e+08	4.66118e+08	6.12855e+08	2.87299e+08	140794380	8.49794e+08	1.91865e+08	8.29135e+08	3.1047e+08	4.11601e+08	9.65414e+07	1.50441e+08	9.48305e+07	1.74446e+07	4.14186e+08	1.32426e+08	1.88281e+08	2.07302e+08	8.47721e+07	1.54127e+08	2.26969e+08	7.80992e+08	9.08591e+08	1.50155e+08	4.49324e+07	3.58273e+08	1.01384e+08
5-Valerolactone	Xenobiotics	Chemical		Meta_13	1.005	101.06	[M+H]+	Positive	705.9	3.26078e+08	207900422	1099854386	1.15955e+08	934734344	2.48714e+08	8.54129e+07	2.51176e+08	192835255	1078286325	1062464084	1.4085e+08	385700172	3.30651e+08	3.50412e+08	4.2757e+08	1.56235e+08	1.50564e+08	5.61654e+08	4.61701e+08	3.91195e+08	7.66844e+08	4.26223e+08	3.06586e+07	292841812	7.63732e+07	2.87052e+07	4.7886e+08	1.73397e+08	2.06881e+08	3.79305e+08	6.64946e+07	1.87605e+08	4.26541e+08	8.52178e+08	8.27714e+08	7.27267e+08	1.74383e+07	2.32258e+08	9.05422e+08
Propanoic Acid	Carbohydrate	Propanoate Metabolism	HMDB0000237	Meta_229	0.988	73.0286	[M-H]-	Negative_NH4HCO3	1108.61	1.57322e+08	1.94158e+08	6.77455e+08	8.36395e+07	7.74587e+08	1.94007e+08	8.39858e+07	1.79013e+08	1.10654e+08	7.7056e+08	6.5879e+08	3.08659e+08	2.3736e+08	1.48683e+08	1.42751e+08	4.05628e+08	9.69433e+07	1.23368e+08	5.23544e+08	2.56471e+08	3.58702e+08	5.72294e+08	2.07453e+08	1.79844e+07	3.69683e+08	5.91307e+07	599960	1.87846e+08	7.17476e+07	1.76707e+08	1.94537e+08	6.01399e+07	8.73205e+07	2.70093e+08	8.16955e+08	7.88309e+08	754234399	1.29855e+07	9.32141e+07	1238110527
BETA-N-ACETYLGLUCOSAMINE	Unclassified	Unclassified		Meta_426	0.971	256.06	[M+Cl]-	Negative_FA	354599	8.42101e+07	1.492e+08	1.10347e+08	5.25479e+06	2.29897e+08	3.90516e+07	1.27675e+07	3.08978e+07	5.94705e+06	1.03981e+08	1.16043e+08	9.10955e+07	8.59105e+07	5.054e+07	4.90253e+07	1.10395e+08	4.674e+07	1.1382e+07	1.58073e+08	4.73827e+07	1.28011e+08	8.93033e+07	1.70467e+07	8.5268e+06	1.96888e+07	2.35018e+07	2.09998e+06	2.04823e+07	1.75605e+07	2.68958e+07	1.1269e+08	2.06564e+07	1.86093e+07	1.15072e+08	4.61689e+07	5.06728e+07	1.33827e+08	2.26632e+06	4.76833e+07	1.91676e+08
Lauryl Sulfate	Xenobiotics	Natural Product/Food/Plant		Meta_336	7.712	265.148	[M-H]-	Negative_NH4HCO3	6677.88	1.04872e+08	1.38198e+08	9.88691e+07	1544087211	7.04397e+07	7.41098e+07	7.96042e+07	7.58562e+07	6.65839e+07	1.09042e+08	7.32063e+07	7.74544e+07	76614999	363463529	3.47924e+08	3.22459e+08	1.11498e+08	9.80277e+07	4.01325e+08	1.59277e+08	9.42677e+07	8.13509e+07	7.92964e+07	6.8583e+07	7.35334e+07	7.39286e+07	6.44545e+07	6.91817e+07	6.54421e+07	7.35741e+07	8.30499e+07	7.68654e+07	6.32363e+07	9.42023e+07	6.71952e+07	6.57599e+07	68981813	7.1161e+07	6.69652e+07	6.88338e+07
Dimethyl Sulfoxide	Xenobiotics	Chemical	HMDB0002151	Meta_4	0.852	79.0185	[M+H]+	Positive	419.58	9.42852e+07	1.33846e+08	9.07146e+07	1.0554e+08	9.50747e+07	151145019	1.11221e+08	3.28781e+07	1.4227e+08	8.23115e+07	6.99832e+07	1.22489e+07	3.77495e+07	1.11134e+08	1.18514e+08	1.29426e+08	6.98927e+07	1.34369e+08	113412190	121496204	7.97119e+07	7.50198e+07	1.05716e+08	1.04089e+08	1.09679e+07	5.6277e+07	7.10824e+07	9.54886e+07	7.52733e+07	7.56997e+07	1.74764e+07	5.01079e+07	8.61316e+07	1.704e+07	7.48599e+07	8.05566e+07	5.65483e+07	143893106	6.53376e+07	1.80365e+07
Glycyl-proline; LC-tDDA; CE10	Unclassified	Unclassified		Meta_81	1.053	173.092	[M+H]+	Positive	116	1.53981e+08	1.31147e+08	3.56774e+08	345674043	1.71876e+08	1.26868e+08	6.93449e+07	7.88151e+07	9.6717e+07	3.63591e+08	2.87065e+08	3.22422e+07	6.73114e+07	2.5981e+08	3.02787e+08	1.9533e+08	1.79008e+08	4.99935e+07	2.50315e+08	7.60887e+07	8.47001e+07	9.2737e+07	2.46149e+08	9.83282e+07	4.07423e+07	3.91197e+07	7.21539e+06	2.8495e+08	9.0267e+07	1.13727e+08	1.08954e+08	3.60014e+07	3.15586e+07	1.20062e+08	4.49447e+08	4.63909e+08	1.88751e+08	4.80969e+07	2.38446e+08	1.84447e+08
Choline	Lipid	Glycerolipid and Phospholipid Metabolism	HMDB0000097	Meta_15	0.935	104.107	[M]+	Positive	253.12	7.54515e+07	1.23075e+08	3.41034e+08	5.00891e+08	2.50821e+08	4.9853e+08	238819624	9.61654e+08	2.15356e+08	3.29436e+08	3.89067e+08	3.12729e+08	3.05858e+08	5.34534e+08	5.43012e+08	3.7277e+08	9.80844e+07	2.22553e+08	4.52428e+08	178500365	5.24863e+08	4.1001e+08	2.58718e+08	2.02063e+08	174625661	1.9899e+08	8.26264e+07	2.70439e+08	1.89289e+08	2.15385e+08	2.83308e+08	189111156	450330154	295160266	3.94545e+08	4.0671e+08	2.42986e+08	1.2954e+08	3.07635e+08	2.82245e+08
Creatine	Amino Acid	Creatine Metabolism	HMDB0000064	Meta_39	0.963	132.077	[M+H]+	Positive	282.59	1.29734e+08	1.21417e+08	3.89269e+08	3.70821e+08	1.91209e+08	2.86929e+08	8.04642e+07	6.0426e+08	1.20464e+08	3.50491e+08	2.02735e+08	2.9166e+08	2.23304e+08	1.43457e+08	1.73082e+08	2.27457e+08	1.81663e+08	1.44066e+08	2.66425e+08	1.27973e+08	1.73779e+08	3.31538e+08	8.45981e+07	102669562	1.95735e+08	1.25104e+08	4.87949e+07	1.07739e+08	1.2559e+08	1.21451e+08	1.15418e+08	1.05531e+08	1.39912e+08	1.23463e+08	1.64353e+08	1.8333e+08	4.96903e+08	5.9348e+07	1.53591e+08	6.42963e+08
Urate	Nucleotide	Purine Metabolism, (Hypo)Xanthine/Inosine containing	HMDB0000289	Meta_277	0.951	167.021	[M-H]-	Negative_NH4HCO3	1403.07	7.96579e+07	1.16554e+08	9.79737e+07	2.33785e+08	1.73919e+07	1.85947e+08	9.5185e+07	2.23233e+07	134343367	9.49373e+07	1.02834e+08	1.53534e+08	1.87692e+08	4.52763e+07	3.95802e+07	1.39327e+08	1.06409e+08	1.01444e+08	1.53324e+08	1.31518e+08	8.94947e+07	1.68486e+07	5.93713e+07	1.50493e+08	1.39912e+08	165890895	1.69754e+08	5.49005e+07	1.03977e+08	1.12205e+08	1.29381e+08	1.69106e+08	5.84927e+07	1.32324e+08	6.37086e+07	6.68605e+07	7.15828e+07	1.51671e+08	1.01275e+08	8.42013e+07
N-ACETYLNEURAMINATE	Unclassified	Unclassified		Meta_206	0.963	310.113	[M+H]+	Positive	3002540	5.58931e+07	9.7843e+07	3.21867e+07	5.98581e+07	4.59424e+07	1.12601e+08	3.99635e+07	7.04128e+07	7.32634e+07	2.80365e+07	7.03343e+07	6.2709e+07	1.04787e+08	2.55519e+07	2.32303e+07	8.82715e+07	6.20079e+07	6.40284e+07	8.86477e+07	6.67815e+07	6.01899e+07	9.55699e+07	8.46825e+07	4.42063e+07	7.47876e+07	3.42076e+07	3.10788e+07	9.64592e+07	4.32317e+07	3.73406e+07	7.30123e+07	3.38471e+07	7.89248e+07	7.99089e+07	8.58992e+07	8.959e+07	5.52525e+07	3.8194e+07	4.27259e+07	5.16053e+07
4-Octylphenol	Xenobiotics	Chemical	HMDB0246557	Meta_310	8.125	205.16	[M-H]-	Negative_NH4HCO3	4035.59	9.34986e+07	9.27927e+07	1.16542e+08	1.08426e+08	1.12938e+08	1.19741e+08	1.27335e+08	6.95065e+07	1.04169e+08	1.16787e+08	9.31164e+07	1.19569e+08	8.46773e+07	9.85118e+07	1.07304e+08	1.23082e+08	9.02121e+07	1.09345e+08	1.11965e+08	1.08419e+08	1.23818e+08	9.80808e+07	122478315	1.03478e+08	7.31787e+07	108079144	7.58434e+07	1.28769e+08	9.64211e+07	1.11749e+08	8.32752e+07	1.19353e+08	8.66602e+07	1.16981e+08	127696391	1.30909e+08	8.22621e+07	109565839	1.21616e+08	6.53061e+07
Acetylcholine	Lipid	Fatty Acid Metabolism (Acyl Choline)	HMDB0000895	Meta_56	0.965	146.118	[M]+	Positive	352.59	1.00346e+08	8.6036e+07	1.95606e+08	9.76576e+07	1.4876e+08	1.11332e+08	3.73256e+07	6.93002e+07	6.06562e+07	1.76917e+08	1.38323e+08	3.15065e+07	1.60547e+08	6.65203e+07	8.08651e+07	6.83554e+07	7.07801e+07	5.27379e+07	8.03378e+07	5.39054e+07	1.47636e+08	1.30975e+08	5.44675e+07	3.44887e+07	3.42588e+07	3.50597e+07	4.53508e+06	6.24724e+07	4.08391e+07	3.93665e+07	4.30809e+07	2.75954e+07	2.84108e+07	4.68951e+07	1.10607e+08	1.15164e+08	2.12861e+08	1.91678e+07	7.29009e+07	2.77782e+08
P-Octopamine	Xenobiotics	Natural Product/Food/Plant	HMDB0004825	Meta_46	1.251	136.076	[M+H-H2O]+	Positive	94.16	1.25645e+08	8.57901e+07	2.23737e+08	2.73661e+08	2.41091e+08	1.08483e+08	6.20439e+07	1.0328e+08	5.63122e+07	2.19754e+08	168394070	1.17842e+08	1.22535e+08	1.423e+08	181023569	152108181	1.22121e+08	4.6763e+07	1.91212e+08	9.73102e+07	1.48924e+08	2.10819e+08	1.32737e+08	7.97583e+07	4.19247e+07	6.36217e+07	1.25001e+07	1.39904e+08	5.34087e+07	7.73609e+07	9.8964e+07	5.61928e+07	6.92484e+07	9.7644e+07	2.5242e+08	2.9878e+08	132287569	3.79327e+07	1.17097e+08	1.49691e+08
3-Methylcatechol	Unclassified	Unclassified		Meta_29	0.851	123.041	[M-H]-	Positive	113.62	8.03921e+07	8.07046e+07	1.01164e+08	1.12418e+08	8.90133e+07	1.61981e+08	7.25089e+07	9.3398e+07	1.0129e+08	1.03463e+08	6.82463e+07	4.30251e+07	9.61031e+07	8.33156e+07	1.05157e+08	1.56303e+08	6.68283e+07	8.35361e+07	126355053	6.59792e+07	8.84127e+07	8.81924e+07	1.24253e+08	8.32898e+07	8.33667e+07	4.10623e+07	1.15064e+08	1.04816e+08	6.92335e+07	5.8584e+07	6.32107e+07	5.47727e+07	2.23228e+08	4.67858e+07	8.11984e+07	1.15231e+08	1.43643e+08	9.96607e+07	1.0081e+08	1.03408e+08
N-ACETYLNEURAMINATE	Unclassified	Unclassified		Meta_185	0.964	274.092	[M-2H2O+H]+	Positive	269.77	3.821e+07	7.73983e+07	2.26368e+07	4.4158e+07	4.39464e+07	8.23392e+07	3.81306e+07	4.49353e+07	5.3356e+07	1.88821e+07	5.17297e+07	4.36698e+07	7.64507e+07	3.08185e+07	2.80756e+07	6.72154e+07	4.40379e+07	5.51029e+07	6.2788e+07	4.87387e+07	4.32465e+07	7.07643e+07	5.89598e+07	3.60437e+07	6.23825e+07	3.46612e+07	1.89238e+07	7.11536e+07	2.70525e+07	2.79041e+07	5.62551e+07	2.9347e+07	5.73043e+07	5.91686e+07	6.31901e+07	6.46419e+07	3.87602e+07	2.89481e+07	3.23086e+07	3.49479e+07
TAURINE	Unclassified	Unclassified		Meta_386	0.943	124.007	[M-H]-	Negative_FA	626.48	5.21996e+07	7.54415e+07	9.11481e+07	119411783	6.44035e+07	8.26824e+07	3.52434e+07	1.70662e+07	3.73681e+07	9.08342e+07	7.14714e+07	2.88593e+07	9.3667e+07	6.62344e+07	6.24903e+07	1.39938e+08	3.73144e+07	6.93376e+07	1.57285e+08	5.74637e+07	8.0806e+07	7.83495e+07	3.50675e+07	1.92566e+07	2.32616e+07	3.59995e+07	1.44502e+07	3.82768e+07	1.52378e+07	1.84392e+07	1.63131e+07	3.85056e+07	5.71105e+07	1.80599e+07	4.17541e+07	4.79012e+07	9.33116e+07	1.83298e+07	3.45866e+07	9.69905e+07
Spermidine	Amino Acid	Polyamine Metabolism	HMDB0001257	Meta_58	0.812	146.165	[M+H]+	Positive	96.98	8.90248e+07	7.25948e+07	5.68265e+07	2.69481e+07	5.94085e+07	9.79061e+07	1.3269e+07	1.66374e+07	6.83698e+06	6.35818e+07	7.84537e+07	9.88177e+06	3.97068e+07	9.12734e+07	89406125	7.6465e+06	1.30698e+07	6.34118e+06	7.6785e+06	3.95523e+07	1.5708e+07	3.54065e+07	3.00889e+07	5.22526e+06	4.03416e+06	9.30339e+06	725236	3.29445e+07	1.63966e+07	2.25568e+07	1.35704e+07	6.6075e+06	3.05373e+07	1.64185e+07	5.02896e+07	4.45391e+07	1.62469e+06	3.78297e+06	3.0843e+07	1.64748e+06
Methionine-D3	Unclassified	Unclassified		Meta_66	1.219	153.077	[M+H]+	Positive	137.15	7.18201e+07	7.20359e+07	6.45843e+07	6.33793e+07	6.34862e+07	7.00562e+07	71994020	7.66056e+07	7.25258e+07	6.55475e+07	6.58713e+07	7.14459e+07	6.64493e+07	7.69705e+07	7.55048e+07	6.67097e+07	6.78734e+07	7.04265e+07	6.04954e+07	70155892	6.30599e+07	7.22461e+07	7.69527e+07	6.80602e+07	1.98456e+07	6.57622e+07	7.12015e+07	7.53192e+07	6.41479e+07	6.80848e+07	6.61447e+07	6.91287e+07	7.52714e+07	6.23894e+07	6.30473e+07	6.55851e+07	6.80122e+07	7.34303e+07	6.9122e+07	6.3152e+07
L-Isoleucine	Amino Acid	Leucine, Isoleucine and Valine Metabolism	HMDB0000172	Meta_42	1.465	132.102	[M+H]+	Positive	120.34	6.62568e+07	6.67206e+07	4.81653e+08	1.48477e+08	1.60627e+08	1.52286e+08	4.5098e+07	3.50056e+07	4.16067e+07	5.2281e+08	1.7225e+08	3.57582e+07	8.34667e+07	1.24725e+08	1.67405e+08	2.28157e+08	100555878	4.59525e+07	2.97155e+08	7.54434e+07	2.41194e+08	9.07981e+07	1.34896e+08	3.61136e+07	3.40763e+07	2.70014e+07	4.00937e+06	1.54817e+08	4.87974e+07	6.32609e+07	5.18574e+07	2.58211e+07	5.31777e+07	5.17108e+07	3.02649e+08	3.42334e+08	4.01658e+07	1.91479e+07	1.32229e+08	2.42423e+07
L-Arginine	Amino Acid	Urea cycle; Arginine and Proline Metabolism	HMDB0000517	Meta_84	0.893	175.119	[M+H]+	Positive	519.36	6.91459e+07	6.65482e+07	1.02469e+08	1.50077e+08	7.72837e+07	6.87102e+07	7.75898e+07	1.22421e+08	5.75824e+07	1.13305e+08	7.53681e+07	1.00846e+08	7.73509e+07	3.4313e+07	4.42068e+07	6.68049e+07	8.5232e+07	4.53899e+07	7.97362e+07	8.83404e+07	3.56382e+07	1.90055e+08	7.26827e+07	7.6262e+07	9.14466e+07	8.41581e+07	2.924e+07	8.69411e+07	9.22007e+07	115399613	2.3462e+08	7.81714e+07	1.0159e+08	2.41804e+08	118903345	1.36686e+08	5.27538e+07	5.01713e+07	1.5974e+08	3.61869e+07
Putrescine	Amino Acid	Polyamine Metabolism	HMDB0001414	Meta_7	0.855	89.1079	[M+H]+	Positive	138.27	1.17882e+08	6.46153e+07	2.87849e+08	5.54709e+07	246769766	1.16649e+08	3.11096e+07	6.99612e+07	8.54505e+07	300410915	2.83045e+08	8.58689e+07	1.31891e+08	1.70441e+08	1.78734e+08	1.27264e+08	4.99766e+07	5.95907e+07	1.57436e+08	1.15839e+08	2.43245e+08	2.41363e+08	1.37932e+08	3.2421e+07	91033364	3.53485e+07	1.05295e+07	161265003	4.07447e+07	5.29048e+07	1.32664e+08	2.7552e+07	8.13709e+07	1.52287e+08	2.59105e+08	2.8947e+08	153049987	1.81168e+07	7.91659e+07	1.89737e+08
1-Aminocyclopropane-1-Carboxylate	Xenobiotics	Natural Product/Food/Plant	HMDB0036458	Meta_14	0.994	102.063	[M+H]+	Positive	13.51	7.27518e+07	6.34649e+07	9.04162e+07	6.67861e+07	8.62959e+07	6.92503e+07	5.996e+07	1.65112e+08	6.67761e+07	8.68452e+07	9.90971e+07	2.98382e+07	6.90462e+07	4.746e+07	5.88133e+07	5.88041e+07	5.37688e+07	6.12623e+07	5.61846e+07	7.68637e+07	4.87029e+07	8.65602e+07	5.94369e+07	5.50077e+07	6.70279e+07	5.82079e+07	3.63609e+07	6.92587e+07	5.08542e+07	5.28951e+07	6.99369e+07	6.22175e+07	5.9538e+07	6.89967e+07	8.57728e+07	8.72407e+07	7.60197e+07	4.23366e+07	6.26665e+07	9.39317e+07
Myristic Acid (C14:0)	Lipid	Long Chain Fatty Acid	HMDB0000806	Meta_321	7.856	227.201	[M-H]-	Negative_NH4HCO3	1780.67	6.06581e+07	5.92447e+07	6.01085e+07	6.59948e+07	6.00079e+07	5.82213e+07	5.96431e+07	5.46967e+07	5.1461e+07	5.95227e+07	5.01964e+07	6.20974e+07	5.71022e+07	6.06389e+07	5.65009e+07	6.44131e+07	5.42049e+07	6.08908e+07	6.45397e+07	6.02162e+07	6.86398e+07	5.29392e+07	6.05959e+07	5.81465e+07	5.95848e+07	6.13267e+07	5.42968e+07	5.74373e+07	5.45021e+07	5.72209e+07	5.92227e+07	6.4778e+07	5.1551e+07	6.23187e+07	5.71106e+07	5.48933e+07	5.70295e+07	5.98267e+07	6.08147e+07	5.09262e+07
P-Coumaric Acid	Amino Acid	Tyrosine Metabolism	HMDB0002035	Meta_75	1.251	165.055	[M+H]+	Positive	254.66	8.73047e+07	5.84765e+07	1.57697e+08	1.93565e+08	1.71303e+08	7.49711e+07	4.35412e+07	7.19391e+07	3.75023e+07	1.649e+08	1.15148e+08	8.66088e+07	8.82707e+07	9.79516e+07	1.26416e+08	1.04033e+08	8.52816e+07	3.09497e+07	1.36224e+08	6.71383e+07	1.02534e+08	142166083	9.12992e+07	5.30947e+07	2.92893e+07	4.49849e+07	7.63107e+06	1.01917e+08	3.72199e+07	5.5225e+07	70569902	4.11007e+07	5.03856e+07	6.9665e+07	1.74821e+08	2.11621e+08	9.27466e+07	2.73383e+07	8.17197e+07	1.03956e+08
Piperidine	Xenobiotics	Natural Product/Food/Plant	HMDB0034301	Meta_5	1.577	86.0969	[M+H]+	Positive	148.49	5.12849e+07	5.5768e+07	3.49786e+08	1.10135e+08	1.26454e+08	1.18604e+08	3.18968e+07	2.56146e+07	2.99356e+07	3.87589e+08	145808047	2.79764e+07	6.54777e+07	7.78349e+07	1.00787e+08	1.50482e+08	6.9136e+07	3.36627e+07	2.00356e+08	4.12778e+07	2.05919e+08	7.185e+07	1.0505e+08	2.37758e+07	3.46317e+07	2.28915e+07	5.42153e+06	9.78072e+07	3.06664e+07	4.57517e+07	4.55367e+07	2.21875e+07	3.99928e+07	5.23165e+07	1.79389e+08	2.24164e+08	3.57143e+07	1.36767e+07	8.25899e+07	2.56345e+07
6-Gingerol	Xenobiotics	Natural Product/Food/Plant	HMDB0005783	Meta_346	7.276	293.176	[M-H]-	Negative_NH4HCO3	2595.73	5.60242e+07	5.2693e+07	5.35593e+07	5.39903e+07	5.58728e+07	5.53422e+07	5.4081e+07	6.05207e+07	5.00253e+07	5.54033e+07	5.77219e+07	7.93205e+07	6.59006e+07	5.62994e+07	5.38906e+07	5.27539e+07	4.84847e+07	6.16049e+07	5.40367e+07	5.2267e+07	7.02363e+07	6.07703e+07	6.23991e+07	5.20264e+07	7.42724e+07	7.08138e+07	6.02849e+07	5.68423e+07	5.41065e+07	5.71483e+07	6.93621e+07	7.41117e+07	5.86742e+07	7.30341e+07	5.49325e+07	5.25736e+07	5.51995e+07	5.56414e+07	5.1188e+07	5.41706e+07
Alpha-Hydroxyisocaproate	Amino Acid	Leucine, Isoleucine and Valine Metabolism	HMDB0000746	Meta_392	4.777	131.071	[M-H]-	Negative_FA	27.47	4.31294e+07	5.15418e+07	4.70844e+08	6.08009e+07	1.43467e+08	1.84562e+08	1.56809e+07	7.77884e+07	4.72501e+07	4.9407e+08	1.81319e+08	6.52627e+07	6.13932e+07	1.3238e+08	1.43226e+08	1.77312e+08	3.21559e+07	6.3875e+07	239988447	5.41876e+07	193382868	8.06487e+07	6.97556e+07	2.90334e+07	7.26335e+07	1.95186e+07	4.15611e+06	7.51613e+07	2.21137e+07	3.04071e+07	3.16477e+07	1.65928e+07	2.30188e+07	3.3798e+07	1.75428e+08	1.70653e+08	1.47722e+08	1.36475e+07	112877750	2.01113e+08
Taurine	Amino Acid	Methionine, Cysteine, SAM and Taurine Metabolism	HMDB0000251	Meta_249	0.926	124.007	[M-H]-	Negative_NH4HCO3	488.65	3.11742e+07	5.05914e+07	4.64704e+07	3.48789e+07	2.87807e+07	2.12412e+07	2.31892e+07	9.9301e+06	1.93567e+07	3.00556e+07	3.33305e+07	1.15693e+07	4.46794e+07	4.20258e+07	3.22583e+07	7.40635e+07	1.93179e+07	4.22635e+07	7.57212e+07	3.41865e+07	4.93986e+07	4.71331e+07	23907126	1.05426e+07	9.16171e+06	2.37979e+07	7.26537e+06	2.10471e+07	8.99491e+06	1.13425e+07	6.39363e+06	2.63554e+07	3.73978e+07	7.08258e+06	1.1841e+07	2.04529e+07	4.19041e+07	1.26069e+07	1.78098e+07	3.93938e+07
L-Tyrosine-D4	Unclassified	Unclassified		Meta_95	1.247	186.106	[M+H]+	Positive	149.09	4.89186e+07	4.9639e+07	4.27428e+07	4.20108e+07	3.9947e+07	4.7247e+07	4.78379e+07	5.38434e+07	5.00407e+07	4.27651e+07	4.39226e+07	4.83966e+07	4.60926e+07	4.99633e+07	4.93092e+07	4.28374e+07	4.86789e+07	4.57553e+07	3.98343e+07	4.72028e+07	4.34094e+07	4.60868e+07	4.87374e+07	4.53114e+07	1.33015e+07	4.38055e+07	4.53375e+07	4.98226e+07	4.0701e+07	4.37908e+07	4.59739e+07	4.56792e+07	4.93935e+07	4.01397e+07	4.1333e+07	4.29462e+07	4.64501e+07	5.04009e+07	4.33662e+07	4.33065e+07
Pyrrolidine	Xenobiotics	Natural Product/Food/Plant	HMDB0031641	Meta_2	1.075	72.0815	[M+H]+	Positive	179.43	7.66315e+07	4.56118e+07	4.25239e+08	6.597e+07	1.89484e+08	1.69483e+08	2.98159e+07	6.01312e+07	4.63051e+07	4.31846e+08	2.18829e+08	6.23202e+07	8.32662e+07	1.26086e+08	1.30536e+08	159389211	7.18364e+07	5.98339e+07	2.26766e+08	8.33808e+07	2.14357e+08	1.38635e+08	1.48213e+08	3.95599e+07	5.30569e+07	3.23869e+07	1.37219e+07	1.60725e+08	3.56744e+07	4.59989e+07	8.13169e+07	2.64655e+07	5.64755e+07	9.50893e+07	2.83099e+08	2.94408e+08	3.83303e+07	2.51918e+07	8.54228e+07	4.67415e+07
L-Glutamic Acid	Amino Acid	Alanine, Aspartate and Glutamate Metabolism	HMDB0000148	Meta_62	0.953	148.06	[M+H]+	Positive	139.99	6.24614e+07	4.55721e+07	148079837	2.39289e+07	8.0223e+07	8.70258e+07	2.84816e+07	1122896056	2.65426e+07	1.33355e+08	1.3857e+08	6.06372e+07	4.71308e+07	6.78162e+07	8.84524e+07	5.84441e+07	5.78177e+07	2.5324e+07	7.47389e+07	6.79242e+07	5.58831e+07	8.23032e+07	5.9309e+07	2.54583e+07	5.45174e+07	1.64592e+07	5.51703e+06	8.10957e+07	3.39994e+07	2.91974e+07	2.92837e+07	1.7265e+07	4.53428e+07	3.76859e+07	8.07623e+07	1.01659e+08	1.70915e+07	1.77594e+07	5.97545e+07	1.65792e+07
Adenine	Nucleotide	Purine Metabolism, Adenine containing	HMDB0000034	Meta_45	1.007	136.062	[M+H]+	Positive	23.52	5.75416e+07	4.38482e+07	4.14418e+07	6.75349e+07	2.98349e+07	5.1882e+07	3.88415e+07	2.83227e+07	3.62603e+07	4.61555e+07	6.7699e+07	1.5412e+07	8.39302e+07	7.68172e+07	8.4955e+07	1.79736e+07	5.54798e+07	3.10263e+07	2.62774e+07	2.92768e+07	4.66948e+07	3.11949e+07	4.62994e+07	3.45856e+07	1.83921e+07	2.922e+07	1.9566e+07	5.70557e+07	6.23557e+07	6.52595e+07	3.6299e+07	2.60278e+07	5.41576e+07	4.12157e+07	7.58528e+07	6.56452e+07	2.46385e+07	2.8295e+07	7.11114e+07	2.83546e+07
Succinic Acid-D4(Neg_FA)	Unclassified	Unclassified		Meta_385	1.336	121.044	[M-H]-	Negative_FA	223.67	4.397e+07	4.27177e+07	3.82325e+07	4.10807e+07	3.9147e+07	4.02394e+07	4.28506e+07	3.82359e+07	4.106e+07	3.83487e+07	3.89335e+07	3.40492e+07	4.15682e+07	4.31624e+07	4.37498e+07	4.16696e+07	4.25146e+07	3.9468e+07	4.05299e+07	4.20695e+07	3.99896e+07	4.17727e+07	4.22794e+07	4.24224e+07	9.7858e+06	3.97962e+07	4.00291e+07	4.25019e+07	3.93509e+07	4.21674e+07	4.16505e+07	3.82097e+07	3.9099e+07	4.11108e+07	4.01496e+07	3.90036e+07	3.33835e+07	4.12864e+07	4.40645e+07	3.06136e+07
Nicotinamide	Cofactors and Vitamins	Nicotinate and Nicotinamide Metabolism	HMDB0001406	Meta_30	1.251	123.044	[M+H]+	Positive	70.41	5.81337e+07	4.03062e+07	1.02299e+08	1.22782e+08	1.0634e+08	5.34334e+07	3.24329e+07	4.98032e+07	2.82202e+07	1.08891e+08	7.35271e+07	6.05211e+07	6.28744e+07	6.80054e+07	8.23722e+07	7.09126e+07	5.72007e+07	2.71354e+07	8.94132e+07	44710349	6.71996e+07	9.34635e+07	6.13312e+07	3.95187e+07	2.31159e+07	3.62557e+07	1.10824e+07	6.83284e+07	2.88178e+07	4.0993e+07	4.79025e+07	2.95353e+07	3.61033e+07	4.64617e+07	1.09436e+08	1.3455e+08	6.0238e+07	2.21235e+07	5.40502e+07	6.63245e+07
Urocanate	Amino Acid	Histidine Metabolism	HMDB0062562	Meta_49	1.039	139.05	[M+H]+	Positive	176.34	2.81789e+07	4.01941e+07	1.89857e+08	1.10561e+08	2.70249e+08	2.4922e+08	9.44825e+07	2.63177e+07	1.08357e+08	2.09054e+08	2.3144e+08	8.80549e+07	1.67077e+08	5.4177e+07	6.13272e+07	1.19897e+08	8.78065e+07	1.56012e+08	1.69494e+08	1.38817e+08	1.82091e+08	1.31498e+08	1.13553e+08	8.84985e+07	1.34313e+08	6.93635e+07	1.79621e+07	1.26699e+08	6.28752e+07	8.88894e+07	1.05071e+08	5.89672e+07	3.88571e+07	1.16826e+08	243196908	2.48056e+08	1.29953e+08	5.0177e+07	2.06353e+08	1.46269e+08
L-Lysine	Amino Acid	Lysine Metabolism	HMDB0000182	Meta_61	0.877	147.113	[M+H]+	Positive	34.1	7.11221e+07	3.89495e+07	1.85012e+08	9.9129e+07	9.37751e+07	5.0128e+07	4.5835e+07	5.34983e+07	3.89438e+07	1.96739e+08	1.43598e+08	4.20443e+07	7.71743e+07	6.74912e+07	7.31979e+07	5.28721e+07	7.62963e+07	2.75794e+07	6.62402e+07	6.07707e+07	133756305	2.01901e+08	7.75372e+07	4.82439e+07	4.29568e+07	6.72556e+07	6.99097e+06	9.31993e+07	7.69767e+07	9.69338e+07	9.55438e+07	5.74907e+07	4.04209e+07	108808419	1.25736e+08	1.50601e+08	3.08563e+07	3.25556e+07	1.36026e+08	2.37253e+07
L-Alanine	Amino Acid	Alanine, Aspartate and Glutamate Metabolism	HMDB0000161	Meta_8	0.949	90.0554	[M+H]+	Positive	70.88	4.3389e+07	3.64146e+07	1.17665e+08	4.18496e+07	7.71511e+07	6.93286e+07	2.93044e+07	1.28953e+08	3.4627e+07	1.07711e+08	7.42431e+07	9.95463e+07	5.91742e+07	5.41646e+07	6.42042e+07	5.91951e+07	4.15013e+07	3.62993e+07	6.25714e+07	5.33061e+07	7.3424e+07	8.21741e+07	5.58183e+07	2.57808e+07	5.46702e+07	2.61917e+07	1.86628e+07	7.41872e+07	3.74242e+07	3.23559e+07	4.1498e+07	2.52458e+07	3.66569e+07	4.02224e+07	7.95631e+07	9.20074e+07	5.38127e+07	1.47541e+07	5.99376e+07	5.73254e+07
N-Acetyl-D-Glucosamine	Carbohydrate	Amino sugar and Nucleotide sugar Metabolism	HMDB0000215	Meta_129	0.966	222.097	[M+H]+	Positive	77.97	1.07739e+07	3.42307e+07	6.50084e+06	1.17038e+06	1.91193e+07	4.12122e+06	1.56463e+06	1.55864e+07	1.54319e+06	5.70971e+06	1.6443e+07	9.04738e+06	8.39128e+06	6.25534e+06	6.4051e+06	1.55698e+07	8.49616e+06	2.42564e+06	1.88068e+07	4.62611e+06	1.12192e+07	8.69551e+06	2.28452e+06	4.27987e+06	8.48235e+06	5.59708e+06	1.04173e+06	2.65993e+06	3.63491e+06	3.5906e+06	1.58742e+07	5.4917e+06	4.87953e+06	1.84409e+07	3.32947e+06	3.33869e+06	1.10786e+07	1.5789e+06	7.30671e+06	1.14755e+07
Lactic Acid	Carbohydrate	Glycolysis, Gluconeogenesis, and Pyruvate Metabolism	HMDB0000190	Meta_234	0.934	89.0236	[M-H]-	Negative_NH4HCO3	827.75	9.12467e+06	3.22874e+07	4.75808e+07	1.01011e+07	1.32091e+08	4.33982e+08	2.88727e+07	2169259304	1.4666e+08	4.94157e+07	2.71457e+07	1038067756	2.0079e+08	1.61118e+07	1.44629e+07	7.73102e+07	8.57563e+06	1.48443e+08	1.11687e+08	1.24372e+08	2.40906e+07	1.48869e+08	4.32392e+07	6.87677e+06	1153326940	1.78171e+07	3.6159e+07	4.00413e+07	1.04092e+07	1.55623e+07	8.79786e+07	2.25353e+07	2.9283e+08	9.4601e+07	5.06466e+07	5.63881e+07	5.56944e+07	9.97383e+06	4.33871e+06	5.70098e+07
Phenyllactic Acid	Amino Acid	Phenylalanine Metabolism	HMDB0000779	Meta_400	5.086	165.055	[M-H]-	Negative_FA	137.39	2.96323e+07	2.83054e+07	2.33857e+08	4.33568e+07	122338123	1.33596e+08	1.64891e+07	2.85934e+07	3.77686e+07	241164472	9.54669e+07	4.3203e+07	5.62352e+07	9.32976e+07	1.04632e+08	1.40455e+08	4.09082e+07	4.1252e+07	1.87989e+08	3.06039e+07	8.88739e+07	4.86303e+07	4.22158e+07	3.11326e+07	3.6968e+07	2.14506e+07	3.26728e+06	4.62053e+07	1.61046e+07	2.31462e+07	2.40443e+07	1.75296e+07	1.90944e+07	2.64272e+07	1.06932e+08	104346954	1.45434e+08	1.5028e+07	5.56795e+07	1.96274e+08
Trigonelline (N'-Methylnicotinate)	Cofactors and Vitamins	Nicotinate and Nicotinamide Metabolism	HMDB0000875	Meta_48	0.964	138.055	[M+H]+	Positive	8.99	1.36533e+07	2.80964e+07	1.27748e+07	4.56677e+06	1.89498e+07	8.7212e+06	5.69452e+06	2.81413e+07	5.35998e+06	1.29792e+07	2.11105e+07	3.23775e+07	1.43233e+07	9.3106e+06	9.15356e+06	1.32592e+07	1.28552e+07	4.97787e+06	1.50363e+07	8.33445e+06	1.59431e+07	1.63606e+07	7.36812e+06	6.90559e+06	9.29034e+07	8.36062e+06	4.90274e+06	8.99745e+06	9.40591e+06	8.54293e+06	2.01069e+07	8.57485e+06	9.7577e+06	2.21793e+07	1.02317e+07	1.26673e+07	1.51682e+07	3.98117e+06	1.33973e+07	1.69167e+07
Tetradecylsulfate	Unclassified	Unclassified		Meta_347	7.912	293.18	[M-H]-	Negative_NH4HCO3	2855.67	3.36424e+07	2.781e+07	3.11804e+07	1.80025e+08	2.28429e+07	2.45063e+07	2.80008e+07	6.32649e+07	9.57739e+07	2.82285e+07	107768471	2.23012e+07	3.12132e+07	3.03024e+07	4.97063e+07	5.96033e+07	8.43803e+07	2.68836e+07	5.94292e+07	3.20003e+07	2.63651e+07	1.31816e+08	2.34092e+07	3.90499e+07	2.29986e+07	2.33426e+07	2.55795e+07	3.04865e+07	7.7077e+07	2.20464e+07	4.75443e+07	2.33945e+07	5.13594e+07	2.42229e+07	3.28979e+07	5.95851e+07	5.09037e+07	2.39624e+07	1.06908e+08	1.21116e+08
2-Hydroxyisovaleric acid	Amino Acid	Leucine, Isoleucine and Valine Metabolism	HMDB0000407	Meta_382	3.155	117.055	[M-H]-	Negative_FA	20.21	1.70782e+07	2.59702e+07	1.22178e+08	3.1659e+07	5.6377e+07	6.93843e+07	9.65972e+06	3.7378e+07	1.86553e+07	1.27739e+08	6.51532e+07	4.36734e+07	4.31403e+07	2.54028e+07	2.88542e+07	5.43245e+07	1.75215e+07	3.34681e+07	7.18995e+07	1.78188e+07	4.79995e+07	4.99762e+07	2.50038e+07	1.71233e+07	3.01913e+07	1.23249e+07	2.35236e+06	2.78439e+07	1.18503e+07	1.6654e+07	2.12577e+07	9.74884e+06	1.38532e+07	2.24155e+07	6.27699e+07	6.29232e+07	1.71729e+08	8.91362e+06	2.47575e+07	2.34315e+08
Hypoxanthine	Nucleotide	Purine Metabolism, (Hypo)Xanthine/Inosine containing	HMDB0000157	Meta_47	1.094	137.046	[M+H]+	Positive	44	2.7636e+07	2.46931e+07	1.32656e+07	4.52673e+07	1.9292e+07	1.78622e+07	1.07359e+07	1.66062e+07	1.05837e+07	1.33659e+07	2.82131e+07	2.8098e+06	4.01711e+07	2.57558e+07	2.82315e+07	3.77916e+06	1.6291e+07	1.27938e+07	4.50809e+06	8.90727e+06	2.82062e+07	1.28403e+07	2.4609e+07	5.11783e+06	1.84465e+06	1.42258e+07	282522	2.77535e+07	1.4977e+07	1.9396e+07	1.01842e+07	1.23974e+07	1.4508e+07	1.14365e+07	4.63692e+07	5.07015e+07	3.02817e+06	3.09397e+06	6.26814e+07	3.13081e+06
3-Phenylpropionic Acid	Xenobiotics	Benzoate Metabolism	HMDB0000764	Meta_264	4.483	149.06	[M-H]-	Negative_NH4HCO3	441.06	3.13954e+07	2.4562e+07	1.05855e+08	5.68001e+06	8.49631e+07	3.77278e+06	8.43621e+06	4.45391e+06	3.27577e+07	1.25696e+08	1.66191e+08	2.48211e+06	3.53965e+07	1.20552e+08	1.13437e+08	1.1922e+08	8.67395e+06	1.1258e+07	1.75029e+08	3.06162e+07	2.81302e+07	3.57041e+07	6.20599e+07	3.01572e+06	3.87459e+07	501708	792073	6.0731e+07	1.26071e+07	2.50489e+07	6.25163e+07	581869	3.02859e+06	7.59957e+07	1.36258e+08	1.31748e+08	3.57217e+07	1.4022e+06	5.38925e+07	4.73563e+07
Acisoga	Amino Acid	Polyamine Metabolism	HMDB0061384	Meta_94	2.458	185.128	[M+H]+	Positive	33.72	8.50775e+06	2.4199e+07	1.56836e+07	1.82727e+07	1.91393e+07	2.70594e+07	3.3866e+06	4.21813e+06	1.14309e+07	1.7815e+07	1.65149e+07	1.30159e+07	2.2044e+07	7.3793e+06	8.58293e+06	2.90246e+07	1.96836e+07	1.30798e+07	3.85175e+07	6.23491e+06	2.65752e+07	9.97316e+06	5.45069e+06	3.10698e+07	6.25099e+06	1.21009e+07	4.18304e+06	6.16343e+06	1.19051e+07	1.63084e+07	1.31471e+07	9.67002e+06	6.99527e+06	1.28522e+07	1.44757e+07	1.35403e+07	3.74838e+07	1.53892e+07	1.37295e+07	5.8141e+07
2-Methylpyrrolidine	Xenobiotics	Natural Product/Food/Plant	HMDB0341433	Meta_6	1.468	86.0969	[M+H]+	Positive	190.16	2.28277e+07	2.29765e+07	1.70452e+08	5.74053e+07	5.50744e+07	5.39986e+07	1.60277e+07	1.40304e+07	1.48145e+07	1.82274e+08	6.022e+07	1.35865e+07	3.14383e+07	4.39796e+07	6.47617e+07	8.16272e+07	3.44096e+07	1.75736e+07	1.18239e+08	2.55406e+07	8.60847e+07	3.13562e+07	4.66878e+07	1.26414e+07	1.21714e+07	1.0646e+07	2.20548e+06	5.31918e+07	1.65679e+07	2.24167e+07	1.8002e+07	9.1261e+06	1.82796e+07	1.82959e+07	1.05678e+08	117335110	1.48128e+07	7.08266e+06	4.52189e+07	9.87092e+06
Erucamide	Lipid	Fatty Acid Metabolism (Fatty Amide)	HMDB0244507	Meta_212	7.568	338.341	[M+H]+	Positive	381192	2.81201e+07	2.26178e+07	2.58422e+07	2.05924e+07	2.26188e+07	2.6902e+07	2.34109e+07	2.64081e+07	3.28215e+07	2.48934e+07	2.87519e+07	2.53179e+07	2.5032e+07	2.33876e+07	2.40091e+07	2.61606e+07	2.40495e+07	2.20829e+07	2.3228e+07	2.11194e+07	2.35642e+07	2.98728e+07	2.42545e+07	2.60923e+07	2.30656e+07	2.65299e+07	2.53541e+07	2.36768e+07	2.87731e+07	2.13853e+07	2.6977e+07	2.37218e+07	2.46714e+07	2.74712e+07	2.72345e+07	2.39863e+07	2.44759e+07	2.8949e+07	2.93466e+07	2.89711e+07
L-Acetylcarnitine	Lipid	Fatty Acid Metabolism (Acyl Carnitine)	HMDB0000201	Meta_114	1.088	204.123	[M+H]+	Positive	445.05	2.7869e+07	2.18193e+07	3.86178e+07	7.31755e+07	5.18271e+07	6.13287e+07	2.68403e+07	4.34337e+07	2.63352e+07	3.86831e+07	5.00144e+07	6.42824e+07	8.2462e+07	2.62197e+07	2.64617e+07	4.54925e+07	2.8042e+07	2.69405e+07	5.63614e+07	1.53167e+07	4.84086e+07	5.81804e+07	1.79238e+07	3.75802e+07	3.81374e+07	5.08016e+07	5.47298e+06	2.14421e+07	1.81089e+07	2.58997e+07	8.84516e+07	4.62999e+07	2.22571e+07	1.01643e+08	4.73443e+07	5.22136e+07	5.0902e+07	2.14022e+07	4.76887e+07	6.40786e+07
Carnitine	Lipid	Fatty Acid Metabolism (Acyl Carnitine)	HMDB0000062	Meta_74	0.949	162.112	[M+H]+	Positive	108.57	2.89403e+07	2.12679e+07	6.1381e+07	5.10506e+07	2.81374e+07	5.75963e+07	2.01133e+07	4.73677e+07	3.07654e+07	5.90091e+07	5.0862e+07	4.45305e+07	62493169	2.23746e+07	2.56762e+07	2.47059e+07	3.61687e+07	1.98793e+07	2.71382e+07	2.13972e+07	5.97754e+07	4.80216e+07	1.72656e+07	3.36428e+07	1.76836e+07	3.26545e+07	6.78687e+06	1.96676e+07	2.6425e+07	2.74832e+07	3.72057e+07	2.99854e+07	26499290	34447324	3.07037e+07	3.36679e+07	7.4768e+07	1.92087e+07	4.32817e+07	8.76772e+07
Leu-Ile	Peptide	Dipeptide	HMDB0028932	Meta_148	4.736	245.185	[M+H]+	Positive	36.82	1.02183e+07	2.10046e+07	2.75334e+06	2.9865e+07	6.33956e+07	51951875	4.25394e+06	243817	2.3624e+07	2.16166e+06	9.06715e+07	2.93037e+06	2.02003e+07	4.0368e+07	2.00568e+07	3.62992e+06	3.55347e+07	1.09084e+06	3.3989e+06	6.39703e+06	2.29104e+07	4.92233e+07	2.27596e+07	1.26987e+07	1.30631e+06	5.21447e+06	154998	2.5053e+07	3.97797e+06	5.28933e+06	8.37778e+06	3.21534e+06	1.27417e+07	1.18168e+07	7.20923e+07	4.33254e+07	2.17893e+07	3.68147e+06	1.00382e+07	3.08057e+07
4-methyl-2-oxopentanoate	Amino Acid	Leucine, Isoleucine and Valine Metabolism	HMDB0000695	Meta_388	4.152	129.055	[M-H]-	Negative_FA	13.55	1.73231e+07	2.09494e+07	5.4887e+07	3.06791e+07	3.66677e+07	2.99432e+07	1.42014e+07	1.29692e+07	1.59239e+07	5.85136e+07	3.99065e+07	2.30178e+07	3.18596e+07	1.9182e+07	1.72084e+07	3.05504e+07	3.17184e+07	1.8661e+07	4.26244e+07	1.94723e+07	35650299	2.31917e+07	2.01205e+07	2.16989e+07	2.18392e+07	2.03932e+07	6.85604e+06	2.40793e+07	1.5982e+07	19167518	3.40614e+07	1.66128e+07	2.04959e+07	4.00355e+07	4.56095e+07	4.81573e+07	1.39424e+07	1.4113e+07	2.514e+07	1.69539e+07
Azelate (C9-DC)	Lipid	Fatty Acid, Dicarboxylate	HMDB0000784	Meta_412	5.625	187.097	[M-H]-	Negative_FA	117.05	2.30257e+07	2.08258e+07	1.61243e+07	4.06622e+07	2.3586e+07	3.60654e+07	2.1068e+07	1.56332e+07	3.17911e+07	1.5939e+07	3.24784e+07	1.77085e+07	4.45881e+07	1.28919e+07	1.52568e+07	4.83622e+07	3.20405e+07	2.81068e+07	6.00176e+07	2.25438e+07	1.60265e+07	1.46923e+07	1.72868e+07	1.37546e+07	1.23377e+07	1.23927e+07	1.07597e+07	1.93942e+07	1.43118e+07	1.15767e+07	3.77402e+07	1.30031e+07	1.67821e+07	3.6305e+07	2.61359e+07	2.61048e+07	6.20817e+07	1.10541e+07	1.8731e+07	8.57525e+07
Phenylacetaldehyde	Amino Acid	Phenylalanine Metabolism	HMDB0006236	Meta_28	1.249	121.065	[M+H]+	Positive	26.58	6.83529e+06	2.08087e+07	9.36577e+06	1.43015e+07	1.10272e+07	5.58273e+06	5.24923e+06	6.45153e+06	5.88122e+06	1.0282e+07	8.42286e+06	5.43003e+06	6.03698e+06	2.67049e+07	6.14531e+06	7.63685e+06	8.27831e+06	3.49626e+06	9.16484e+06	6.61424e+06	7.389e+07	9.77139e+06	7.14105e+06	5.53084e+06	3.92701e+07	6.7013e+06	3.77914e+06	7.13653e+06	3.71119e+06	4.63615e+06	5.89229e+06	5.91045e+06	3.81115e+06	5.90677e+06	1.22942e+07	1.35551e+07	8.33588e+06	3.12524e+06	5.93717e+06	7.13823e+06
Thr-Phe	Peptide	Dipeptide	HMDB0029068	Meta_179	3.491	267.134	[M+H]+	Positive	78.45	2.40562e+07	1.89734e+07	897646	6.27864e+07	2.63708e+07	3.52303e+07	1.7296e+07	1.277e+07	2.12779e+07	662564	4.37146e+07	2.70914e+07	5.06171e+07	2.67951e+07	2.1901e+07	732269	1.98493e+07	1.02407e+07	618977	2.5765e+07	1.23426e+07	4.38029e+07	1.05543e+07	4.33155e+07	6.41512e+06	4.33739e+07	2.19994e+06	1.17195e+07	2.00782e+07	2.54933e+07	5.59311e+07	3.24593e+07	1.56578e+07	6.73059e+07	2.85428e+07	1.72839e+07	1.16289e+07	2.26685e+07	3.6487e+07	1.41924e+07
N-Methylproline	Amino Acid	Urea cycle; Arginine and Proline Metabolism	HMDB0094696	Meta_36	0.876	130.086	[M+H]+	Positive	81.8	2.83171e+07	1.87433e+07	6.8033e+07	3.85416e+07	3.66634e+07	1.94973e+07	1.85261e+07	2.45334e+07	1.80284e+07	7.78801e+07	5.556e+07	1.79196e+07	3.03533e+07	2.93895e+07	3.20351e+07	2.23162e+07	3.03669e+07	1.38899e+07	2.64584e+07	2.5652e+07	53006098	6.57029e+07	2.76136e+07	2.15973e+07	1.8218e+07	2.70236e+07	5.37746e+06	3.19696e+07	2.53925e+07	3.52199e+07	4.04311e+07	2.57002e+07	1.34889e+07	4.12918e+07	4.31633e+07	5.16382e+07	1.73603e+07	1.29915e+07	5.65043e+07	1.20656e+07
FRUCTOSE	Unclassified	Unclassified		Meta_107	0.952	203.053	[M+Na]+	Positive	308.06	1.12584e+07	1.8234e+07	1.05574e+07	3.39499e+06	1.10436e+07	1.32466e+07	7.27789e+06	4.67676e+08	3.76552e+06	8.88264e+06	1.67241e+07	122933408	1.18753e+07	1.38692e+07	1.33607e+07	8.38255e+06	1.79813e+07	9.22343e+06	1.07541e+07	1.32828e+07	2.08406e+07	2.1348e+07	5.34425e+06	4.94362e+06	9.15716e+07	8.2284e+06	2.18394e+06	6.35719e+06	8.57238e+06	8.56031e+06	1.79604e+07	5.93459e+06	3.49316e+07	1.80937e+07	5.42637e+06	7.2858e+06	1.17507e+07	3.62719e+06	1.09702e+07	1.21969e+07
Gly-Tyr	Peptide	Dipeptide	HMDB0028853	Meta_143	1.601	239.102	[M+H]+	Positive	139.8	2.96947e+07	1.81958e+07	3.55788e+07	6.61473e+07	3.34432e+07	2.32165e+07	1.74365e+07	3.18986e+07	9.54924e+06	3.36532e+07	4.57437e+07	2.50034e+07	2.57284e+07	4.13637e+07	5.82019e+07	2.81152e+07	3.4764e+07	1.25626e+07	3.29578e+07	2.0728e+07	1.44533e+07	5.5978e+07	4.26743e+07	1.58557e+07	1.01193e+07	1.50293e+07	3.52304e+06	4.89466e+07	4.49356e+07	60407304	7.1592e+07	1.98155e+07	1.70862e+07	6.58664e+07	7.73364e+07	9.41688e+07	3.31161e+07	1.33316e+07	6.73985e+07	2.47571e+07
L-Methionine	Amino Acid	Methionine, Cysteine, SAM and Taurine Metabolism	HMDB0000696	Meta_64	1.231	150.058	[M+H]+	Positive	19.16	1.34049e+07	1.80687e+07	6.17205e+07	2.48796e+07	9.22477e+06	8.7529e+06	4.65075e+06	5.07869e+06	4.01752e+06	6.55895e+07	1.35245e+07	2.13656e+06	4.03684e+06	1.94435e+07	2.53661e+07	2.50707e+07	1.28217e+07	3.34123e+06	3.33957e+07	5.00086e+06	3.92308e+07	1.42516e+07	2.27649e+07	1.80075e+06	1.11765e+06	2.36668e+06	915654	2.63345e+07	5.77536e+06	8.05247e+06	5.66557e+06	2.49144e+06	5.61149e+06	5.7224e+06	4.23413e+07	5.49428e+07	8.27022e+06	1.49151e+06	2.11548e+07	3.0174e+06
L-Glutamine	Amino Acid	Alanine, Aspartate and Glutamate Metabolism	HMDB0000641	Meta_60	0.95	147.076	[M+H]+	Positive	7.21	1.53883e+07	1.76995e+07	5.93126e+07	2.23441e+07	1.55754e+07	2.17605e+07	7.9645e+06	4.42556e+07	8.88608e+06	5.62023e+07	2.65188e+07	3.74488e+06	1.87917e+07	2.27859e+07	2.39917e+07	2.83096e+07	2.07948e+07	1.1055e+07	3.80877e+07	1.93448e+07	9.83477e+06	2.61531e+07	2.77356e+07	7.26787e+06	4.47742e+07	6.92689e+06	825666	3.1344e+07	1.71131e+07	1.73042e+07	4.48631e+06	7.68279e+06	9.26076e+06	8.62851e+06	2.55329e+07	4.08677e+07	8.38775e+06	4.32629e+06	1.90482e+07	5.0343e+06
Canrenone	Xenobiotics	Drug	HMDB0003033	Meta_366	8.003	339.2	[M-H]-	Negative_NH4HCO3	567.32	1.64425e+07	17044163	1.63441e+07	2.1504e+07	1.64352e+07	1.60145e+07	1.5464e+07	1.36172e+07	1.34399e+07	1.76465e+07	1.33912e+07	1.82225e+07	1.59292e+07	1.79933e+07	1.53832e+07	1.93253e+07	1.4001e+07	1.80292e+07	1.84976e+07	1.70058e+07	2.01592e+07	1.50179e+07	1.82162e+07	1.53572e+07	1.82992e+07	1.68685e+07	1.57518e+07	1.53432e+07	1.41942e+07	1.79045e+07	1.59961e+07	1.78591e+07	1.46168e+07	1.72351e+07	1.5109e+07	1.46986e+07	1.49861e+07	1.65144e+07	1.27473e+07	1.36013e+07
N-Acetylputrescine	Amino Acid	Polyamine Metabolism	HMDB0002064	Meta_38	0.993	131.118	[M+H]+	Positive	220.74	3.45553e+07	1.65629e+07	7.48747e+07	1.72151e+07	8.9473e+07	3.1195e+07	1.35436e+07	1.19956e+07	2.34062e+07	7.11748e+07	1.03764e+08	2.64859e+07	4.07393e+07	6.18752e+07	6.92947e+07	3.53904e+07	2.73387e+07	8.76422e+06	4.49679e+07	2.40719e+07	8.7105e+07	6.32454e+07	8.2211e+07	9.97371e+06	2.60299e+07	1.26729e+07	2.72555e+06	9.51583e+07	2.27108e+07	2.53163e+07	3.90328e+07	1.09479e+07	2.26205e+07	4.35442e+07	164915196	1.61965e+08	5.41476e+07	3.93837e+06	3.48537e+07	6.82368e+07
Pyroglutamic Acid	Amino Acid	Glutathione Metabolism	HMDB0000267	Meta_35	0.949	130.05	[M+H]+	Positive	203.56	2.51079e+07	1.63102e+07	5.71647e+07	1.67039e+07	2.89755e+07	1.99404e+07	1.29168e+07	2.13833e+08	1.02568e+07	5.36945e+07	3.69355e+07	1.41588e+07	1.79149e+07	2.30512e+07	2.83327e+07	2.76716e+07	2.38218e+07	1.34276e+07	3.10681e+07	2.46005e+07	1.59697e+07	3.43365e+07	26782282	1.40743e+07	3.41708e+07	1.015e+07	8.10252e+06	3.50639e+07	1.66713e+07	1.59536e+07	1.33993e+07	1.08573e+07	1.66918e+07	1.31395e+07	3.46545e+07	3.74366e+07	1.22767e+07	1.18984e+07	2.4526e+07	1.0772e+07
Glycine	Amino Acid	Glycine, Serine and Threonine Metabolism	HMDB0000123	Meta_3	0.941	76.04	[M+H]+	Positive	25.05	2.55794e+07	1.52779e+07	4.69774e+07	1.91088e+07	2.50666e+07	1.4163e+07	1.6993e+07	1.72507e+07	12808381	4.45586e+07	2.43694e+07	1.31367e+07	1.58457e+07	2.38612e+07	2.26254e+07	2.07925e+07	1.75021e+07	1.39662e+07	2.01978e+07	2.99201e+07	1.69653e+07	3.69978e+07	2.75901e+07	2.05304e+07	1.998e+07	1.76502e+07	1.60444e+07	2.99964e+07	1.94327e+07	1.65948e+07	2.21123e+07	9.43995e+06	1.98937e+07	2.22872e+07	3.14315e+07	2.98675e+07	1.73571e+07	1.23941e+07	3.18666e+07	1.2489e+07
Carnitine-D3	Unclassified	Unclassified		Meta_76	0.949	165.131	[M+H]+	Positive	35.72	1.74374e+07	1.49472e+07	1.05228e+07	6.54155e+06	1.1611e+07	7.91159e+06	1.37317e+07	1.26194e+07	1.50744e+07	10109458	1.44811e+07	1.87689e+07	1.19975e+07	1.08587e+07	1.11831e+07	5317902	1.85326e+07	1.19396e+07	4.49984e+06	1.78354e+07	9.14193e+06	1.43907e+07	1.49283e+07	1.28781e+07	5.50338e+06	1.22797e+07	2.02303e+07	1.41437e+07	1.71547e+07	1.37248e+07	1.19686e+07	1.38495e+07	1.31278e+07	9.86104e+06	9.61576e+06	9.71884e+06	1.26181e+07	1.58935e+07	1.3683e+07	1.04823e+07
Nonanoic Acid (C9:0)	Lipid	Medium Chain Fatty Acid	HMDB0000847	Meta_270	7.279	157.123	[M-H]-	Negative_NH4HCO3	234.2	1.2898e+07	1.37383e+07	1.42813e+07	1.42211e+07	1.31195e+07	1.34939e+07	1.33012e+07	1.10248e+07	1.10917e+07	1.39277e+07	1.00685e+07	1.39358e+07	1.21032e+07	1.41152e+07	1.37011e+07	1.53333e+07	1.39306e+07	1.27852e+07	1.56169e+07	1.25593e+07	1.51972e+07	1.06826e+07	1.49498e+07	1.26066e+07	1.353e+07	1.47038e+07	1.08043e+07	1.24346e+07	1.09471e+07	1.3012e+07	1.18028e+07	1.71011e+07	1.16942e+07	1.35059e+07	1.36657e+07	1.20528e+07	1.15852e+07	1.26246e+07	1.21733e+07	1.161e+07
Picolinic Acid	Amino Acid	Tryptophan Metabolism	HMDB0002243	Meta_31	0.85	124.041	[M+H]+	Positive	14.02	1.24779e+07	1.3705e+07	1.68052e+07	1.6911e+07	1.57459e+07	2.46335e+07	1.2739e+07	1.63426e+07	1.82927e+07	1.82717e+07	1.36595e+07	7.97525e+06	1.61991e+07	1.8169e+07	2.47713e+07	2.3753e+07	1.47043e+07	1.31149e+07	22277662	1.09434e+07	1.50534e+07	1.64152e+07	2.15911e+07	1.3565e+07	1.58468e+07	7.07544e+06	2.17807e+07	1.69866e+07	1.16592e+07	1.05322e+07	1.16699e+07	8.91536e+06	3.74563e+07	8.27134e+06	1.31081e+07	2.12197e+07	2.53027e+07	1.66539e+07	1.77463e+07	1.81529e+07
L-Aspartic Acid	Amino Acid	Alanine, Aspartate and Glutamate Metabolism	HMDB0000191	Meta_393	0.942	132.03	[M-H]-	Negative_FA	48.48	2.84438e+07	1.35592e+07	2.64779e+07	2.19236e+07	4.40009e+07	2.47786e+07	2.10646e+07	2.06515e+07	1.6573e+07	2.72896e+07	3.50389e+07	4.78792e+07	1.94179e+07	2.36781e+07	2.47854e+07	2.12488e+07	2.15483e+07	1.57343e+07	2.50023e+07	1.88126e+07	1.43129e+07	2.6231e+07	2.39922e+07	1.29337e+07	2.39695e+07	1.51948e+07	8.52429e+06	2.63619e+07	1.98247e+07	2.26603e+07	2.7987e+07	1.63357e+07	1.92915e+07	2.96533e+07	3.35547e+07	3.87267e+07	1.25043e+07	1.05072e+07	3.00528e+07	1.30139e+07
L-Tryptophan	Amino Acid	Tryptophan Metabolism	HMDB0000929	Meta_116	3.229	205.097	[M+H]+	Positive	79.69	1.37277e+07	1.35418e+07	5.91512e+07	2.24356e+07	5.65678e+07	5.66554e+07	1.0885e+07	2.45181e+07	2.2196e+07	6.28426e+07	4.64449e+07	5.50215e+06	3.80725e+07	2.77286e+07	3.54619e+07	3.01947e+07	1.46326e+07	2.56171e+07	4.3007e+07	2.13148e+07	1.35035e+08	1.73919e+07	3.82859e+07	1.3092e+07	1.08522e+07	3.71794e+06	2.61398e+06	4.16777e+07	4.33299e+06	6.00736e+06	9.63283e+06	3.18999e+06	5.06992e+06	9.93756e+06	8.51278e+07	9.16174e+07	1.91856e+07	6.9576e+06	7.8419e+06	1.52498e+07
Coumaric acid (isomer of 192, 194)	Unclassified	Unclassified		Meta_59	1.25	147.044	[M+H-H2O]+	Positive	7.66	2.00015e+07	1.32269e+07	3.53394e+07	4.62901e+07	3.80025e+07	1.76813e+07	1.05282e+07	1.70796e+07	8.76194e+06	3.7681e+07	2.59747e+07	2.09468e+07	2.03048e+07	2.29107e+07	2.84091e+07	2.34397e+07	1.96811e+07	7.14227e+06	3.07831e+07	1.57265e+07	2.31438e+07	3.41173e+07	2.10562e+07	1.25899e+07	6.61674e+06	1.0924e+07	1.68954e+06	2.31434e+07	8.93567e+06	1.34178e+07	1.67161e+07	9.42403e+06	1.12714e+07	1.60172e+07	3.99577e+07	4.8181e+07	2.06411e+07	5.89948e+06	1.94138e+07	2.41045e+07
TRYPTOPHAN	Unclassified	Unclassified		Meta_96	3.228	188.07	[M+H]+	Positive	105.54	1.3379e+07	1.3207e+07	5.87037e+07	2.21699e+07	5.6584e+07	5.71318e+07	1.10914e+07	2.4189e+07	2.12729e+07	6.25431e+07	4.63447e+07	5.2787e+06	3.88537e+07	27537279	3.56795e+07	2.98669e+07	1.47852e+07	2.47609e+07	4.17959e+07	2.0728e+07	1.34672e+08	1.65439e+07	3.78198e+07	1.27857e+07	1.07854e+07	3.61124e+06	2.50274e+06	4.13919e+07	4.15003e+06	6.04738e+06	9.53191e+06	3.18447e+06	4.76088e+06	9.52322e+06	8.51491e+07	9.0902e+07	1.84768e+07	6.93302e+06	7.64107e+06	1.52746e+07
m-Cumenyl methylcarbamate	Unclassified	Unclassified		Meta_104	6.376	194.117	[M+H]+	Positive	84.43	1.39132e+07	1.2274e+07	2.04538e+07	2.43278e+07	2.23818e+07	1.56903e+07	1.86252e+07	1.19201e+07	2.187e+07	1.86591e+07	1.56084e+07	1.11416e+07	8.97528e+06	1.17493e+07	1.64517e+07	2.04528e+07	1.80997e+07	1.55908e+07	2.00992e+07	1.8399e+07	1.99996e+07	2.15463e+07	1.68629e+07	1.7861e+07	2.34999e+06	1.68349e+07	3.91559e+06	1.98964e+07	1.87863e+07	1.77211e+07	1.2912e+07	1.74652e+07	1.71808e+07	1.74729e+07	2.45779e+07	2.32117e+07	1.20338e+07	1.55047e+07	2.51166e+07	1.55466e+07
D-ORNITHINE	Unclassified	Unclassified		Meta_44	0.877	133.097	[M+H]+	Positive	101.47	3.39561e+07	1.21534e+07	56117506	2.84322e+07	9.73871e+07	2.30097e+07	1.82593e+07	2.98224e+07	2.32598e+07	6.11259e+07	5.80174e+07	2.56696e+07	4.23753e+07	4.18146e+07	3.99143e+07	4.03722e+07	3.91137e+07	1.69424e+07	4.81217e+07	4.00236e+07	3.87263e+07	5.70454e+07	6.57506e+07	1.63474e+07	2.42265e+07	2.95744e+07	8.44163e+06	7.87438e+07	3.35356e+07	4.17452e+07	5.02558e+07	2.2578e+07	1.59168e+07	5.14594e+07	1.09214e+08	1.15341e+08	4.14385e+07	9.37754e+06	6.25293e+07	4.98887e+07
Tyr-Ile	Unclassified	Unclassified		Meta_199	4.087	295.165	[M+H]+	Positive	177700	1.22052e+07	1.20418e+07	2.73568e+06	2.68824e+07	1.90796e+07	1.48691e+07	1.00239e+07	6.68355e+06	5.84209e+06	1.71525e+06	2.89052e+07	2.2407e+07	1.39183e+07	1.86925e+07	1.22603e+07	3.06159e+06	1.32534e+07	6.78642e+06	2.78142e+06	1.34616e+07	7.59175e+06	2.39681e+07	9.14814e+06	7.57496e+06	5.98047e+06	1.30095e+07	2.44231e+06	8.94075e+06	8.14511e+06	1.0166e+07	2.15766e+07	1.02552e+07	4.5634e+06	2.86225e+07	2.35627e+07	1.60891e+07	5.56332e+06	2.81178e+06	8.24273e+06	6.80085e+06
Oleic Acid (C18:1)	Lipid	Long Chain Fatty Acid	HMDB0000207	Meta_343	8.141	281.249	[M-H]-	Negative_NH4HCO3	986.22	2.07344e+07	1.20261e+07	2.87056e+07	5.08613e+07	1.48514e+07	1.2204e+07	1.41082e+07	9.92743e+06	8.95424e+06	2.79155e+07	9.37131e+06	9.74906e+06	1.06048e+07	9.8218e+06	9.75818e+06	3.31324e+07	1.70958e+07	1.12554e+07	3.57693e+07	1.81244e+07	145042899	2.51232e+07	1.01951e+07	1.97076e+07	8.92252e+06	1.77983e+07	8.15962e+06	9.91239e+06	8.51869e+06	1.07453e+07	9.95693e+06	1.47763e+07	8.64052e+06	1.08103e+07	1.15722e+07	1.06806e+07	9.12639e+06	1.15785e+07	4.61577e+07	7.87752e+06
3-Methyl-2-Oxovaleric Acid	Amino Acid	Leucine, Isoleucine and Valine Metabolism	HMDB0000491	Meta_387	3.785	129.055	[M-H]-	Negative_FA	8.3	9.15843e+06	1.17943e+07	2.7184e+07	1.47362e+07	1.96193e+07	1.44964e+07	9.67472e+06	7.60633e+06	1.074e+07	2.83816e+07	1.9983e+07	1.23497e+07	1.51816e+07	1.26747e+07	1.4219e+07	1.79975e+07	2.18984e+07	1.04452e+07	2.51734e+07	1.1623e+07	1.76555e+07	1.18249e+07	1.32411e+07	1.25137e+07	8.04106e+06	9.13268e+06	2.87066e+06	1.46031e+07	1.27615e+07	1.1927e+07	1.62093e+07	9.602e+06	1.08573e+07	1.37531e+07	2.65376e+07	2.73254e+07	1.24978e+07	9.61352e+06	1.6639e+07	1.24825e+07
Guanine	Nucleotide	Purine Metabolism, Guanine containing	HMDB0000132	Meta_65	1.007	152.057	[M+H]+	Positive	40.51	4.16975e+06	1.11716e+07	6.33214e+06	1.32323e+07	9.45532e+06	1.04338e+07	9.30755e+06	9.15439e+06	9.90512e+06	4.90616e+06	8.40044e+06	2.19867e+06	3.62504e+07	1.82761e+07	1.74595e+07	1.38071e+06	6.82104e+06	7.55645e+06	1.41514e+06	4.42269e+06	5.87229e+06	2.91125e+06	1.97209e+07	4.84184e+06	1.54422e+06	1.12394e+07	737134	2.11607e+07	1.80389e+07	2.04062e+07	1.13402e+07	1.0325e+07	1.85694e+07	1.28974e+07	2.7378e+07	2.2969e+07	1.66076e+06	3.42548e+06	3.79582e+07	2.19177e+06
2-Hydroxybutyric Acid	Carbohydrate	Propanoate Metabolism	HMDB0000008	Meta_379	1.708	103.039	[M-H]-	Negative_FA	81.15	9.25424e+06	1.03589e+07	5.29962e+07	1.09889e+07	1.6787e+07	3.17609e+07	7.40231e+06	4.58481e+07	1.41153e+07	5.17235e+07	1.51861e+07	5.6659e+07	19472019	7.00963e+06	6.52543e+06	1.27748e+07	7.05648e+06	2.39334e+07	1.80461e+07	1.01e+07	1.82412e+07	1.64236e+07	1.04011e+07	1.24173e+07	1.92908e+07	2.01852e+07	4.54624e+06	8.51924e+06	8.14238e+06	1.14843e+07	1.47946e+07	1.78722e+07	9.35885e+06	1.7025e+07	1.73673e+07	1.72737e+07	4.06181e+07	8.58814e+06	5.78848e+06	5.32502e+07
Gamma-Glutamylmethionine	Peptide	Gamma-glutamyl Amino Acid	HMDB0034367	Meta_188	1.934	279.1	[M+H]+	Positive	9.81	1.04645e+07	1.01216e+07	3.73232e+06	5.83495e+06	3.98831e+06	7.93029e+06	428780	2.6216e+06	492480	3.48718e+06	4.8712e+06	0	7.14949e+06	8.60281e+06	9.74199e+06	2.95464e+06	6.78412e+06	1.61847e+06	3.38739e+06	1.50965e+06	1.74642e+06	2.67468e+06	6.78579e+06	229667	0	639290	278231	8.03763e+06	2.49951e+06	3.13819e+06	1.15751e+06	517468	1.49418e+06	1.44058e+06	1.55012e+07	1.46737e+07	699497	122294	814717	1.02768e+06
Hydroxyphenyllactic Acid	Amino Acid	Tyrosine Metabolism	HMDB0000755	Meta_287	1.249	181.05	[M-H]-	Negative_NH4HCO3	710.15	1.66442e+07	9.73746e+06	6.40849e+07	1.73475e+07	5.48442e+07	3.8146e+07	7.41458e+06	8.38945e+06	8.92886e+06	6.79027e+07	3.27131e+07	2.81752e+07	2.3282e+07	2.56308e+07	2.55134e+07	2.19799e+07	1.94648e+07	1.22352e+07	2.98716e+07	1.4586e+07	3.17522e+07	3.82175e+07	1.96022e+07	1.65159e+07	8.48587e+07	1.23939e+07	1.03534e+06	2.0637e+07	7.13215e+06	1.27912e+07	1.81779e+07	1.08646e+07	1.35861e+07	2.10633e+07	4.11015e+07	3.92818e+07	6.90825e+07	6.93077e+06	2.87756e+07	8.45293e+07
Uracil	Nucleotide	Pyrimidine Metabolism, Uracil containing	HMDB0000300	Meta_19	0.851	113.036	[M+H]+	Positive	11.89	7.8003e+06	9.34848e+06	7.40627e+06	9.02107e+06	8.04432e+06	1.42592e+07	9.08973e+06	5.77208e+06	1.36358e+07	6.53549e+06	5.30192e+06	1.08884e+06	3.84508e+06	8.90579e+06	9.13646e+06	1.01699e+07	6.37378e+06	1.11697e+07	8.55933e+06	1.08385e+07	6.61299e+06	7.40754e+06	9.98314e+06	8.43375e+06	3.92728e+06	3.70105e+06	6.50987e+06	6.12279e+06	5.94251e+06	5.96588e+06	2.72279e+06	4.83925e+06	9.84949e+06	1.40798e+06	9.65546e+06	6.17256e+06	5.80779e+06	1.19626e+07	6.72474e+06	1.78163e+06
Cyclohexanamine	Xenobiotics	Chemical	HMDB0031404	Meta_12	2.057	100.112	[M+H]+	Positive	76.57	1.0186e+07	9.19893e+06	9.21682e+06	7.98771e+06	9.50486e+06	1.01049e+07	1.16213e+07	7.80661e+06	1.05725e+07	8.94257e+06	9.27905e+06	9.20937e+06	8.26109e+06	1.10287e+07	1.82371e+07	1.12307e+07	1.01779e+07	1.0313e+07	1.24728e+07	9.59353e+06	8.51933e+06	1.11929e+07	1.22333e+07	1.0759e+07	2.946e+06	9.80081e+06	10734831	1.34658e+07	9.47985e+06	1.02392e+07	1.10511e+07	9.74415e+06	9.60419e+06	9.24617e+06	1.09083e+07	1.10681e+07	9.15732e+06	1.04478e+07	1.0121e+07	9.35339e+06
Pyruvic Acid	Carbohydrate	Glycolysis, Gluconeogenesis, and Pyruvate Metabolism	HMDB0000243	Meta_231	0.956	87.008	[M-H]-	Negative_NH4HCO3	247.39	3.55085e+06	9.05871e+06	1.03729e+07	8.12215e+06	1.60111e+07	3.51571e+07	6.38906e+06	7.58604e+07	1.20109e+07	1.08513e+07	9.41465e+06	4.31918e+07	1.45115e+07	1.69506e+06	1.5091e+06	1.58263e+07	1.00985e+07	1.3483e+07	2.10135e+07	9.10011e+06	1.6228e+07	1.26381e+07	1.03176e+07	4.47171e+06	5.43458e+07	3.1676e+06	2.41233e+06	9.81263e+06	3.9501e+06	6.39478e+06	1.93462e+07	2.86442e+06	1.34151e+07	2.04557e+07	1.58609e+07	1.67952e+07	1.25189e+07	3.09158e+06	2.02684e+06	1.6286e+07
2-Oxoarginine	Amino Acid	Urea cycle; Arginine and Proline Metabolism	HMDB0004225	Meta_82	1.053	174.095	[M+H]+	Positive	26.1	1.14324e+07	9.01818e+06	2.71988e+07	2.59289e+07	1.26826e+07	1.01704e+07	4.86898e+06	5.38126e+06	6.93377e+06	2.70593e+07	2.205e+07	2.44051e+06	4.9002e+06	1.94579e+07	2.41423e+07	1.42545e+07	1.29303e+07	3.51768e+06	1.82539e+07	5.57029e+06	6.46638e+06	7.18567e+06	1.84228e+07	7.3811e+06	7.59057e+06	2.89057e+06	403732	2.19403e+07	6.53931e+06	8.31391e+06	7.72045e+06	2.59329e+06	2.5069e+06	8.38481e+06	3.40273e+07	3.48365e+07	1.42462e+07	3.49311e+06	1.83797e+07	1.35513e+07
N-Acetylglycine	Amino Acid	Glycine, Serine and Threonine Metabolism	HMDB0000532	Meta_24	0.847	118.047	[M+H]+	Positive	12.34	8.56138e+06	8.85565e+06	7.25374e+06	8.39851e+06	8.0805e+06	1.03424e+07	9.14241e+06	4.38356e+06	9.578e+06	6.46987e+06	1.06162e+07	2.74476e+06	4.65854e+06	8.08245e+06	1.07929e+07	1.0477e+07	7.23086e+06	1.00118e+07	8.33566e+06	8.88853e+06	6.43477e+06	7.13892e+06	8.44114e+06	8.36236e+06	2.12532e+06	5.30898e+06	5.59049e+06	8.10119e+06	7.05608e+06	7.67703e+06	3.07452e+06	4.84494e+06	8.06971e+06	2.3156e+06	8.20356e+06	6.40576e+06	6.39632e+06	1.05369e+07	6.87051e+06	2.80097e+06
3-Hydroxybutyric Acid	Lipid	Ketone Bodies	HMDB0000011	Meta_380	1.411	103.039	[M-H]-	Negative_FA	44.27	4.6109e+06	8.77579e+06	4.04569e+07	5.49525e+06	6.79502e+06	7.63434e+07	4.04014e+06	2.56547e+07	1.41183e+07	4.02215e+07	5.93071e+06	7.72991e+06	7.31031e+06	4.12158e+06	4.19358e+06	2.00688e+07	3.87619e+06	3.13375e+07	2.52014e+07	3.93358e+06	2.49983e+07	8.55236e+06	6.49896e+06	8.75203e+06	6.14288e+06	1.08557e+07	4.32461e+06	5.0018e+06	3.86786e+06	3.39198e+06	4.52435e+06	9.58454e+06	3.52835e+06	4.41329e+06	6.6031e+06	7.39593e+06	7.12313e+06	4.12968e+06	4.04836e+06	9.04416e+06
Leu-Tyr	Peptide	Dipeptide	HMDB0028941	Meta_200	3.427	295.165	[M+H]+	Positive	103847	5.19047e+06	8.63694e+06	1.4141e+06	1.69513e+07	8.44316e+06	1.34257e+07	3.68202e+06	655059	7.42241e+06	792860	1.87615e+07	4.02974e+06	1.00062e+07	1.75479e+07	1.043e+07	766006	6.31457e+06	1.60943e+06	827805	4.65546e+06	2.85801e+06	1.18008e+07	5.09455e+06	5.75721e+06	1.51159e+06	3.30261e+06	761652	5.36282e+06	4.22937e+06	5.30059e+06	1.14899e+07	3.02888e+06	4.87498e+06	1.33829e+07	1.73759e+07	6.14909e+06	6.5283e+06	2.64144e+06	8.77579e+06	8.78962e+06
2-Hydroxyglutaric Acid	Carbohydrate	Citrate cycle (TCA cycle)	HMDB0059655	Meta_261	0.838	147.029	[M-H]-	Negative_NH4HCO3	448.36	1.23603e+07	8.63134e+06	9.5149e+07	8.8762e+06	4.78187e+07	4.58642e+07	9.06295e+06	3.4003e+07	1.66007e+07	9.32035e+07	5.12566e+07	3.98259e+07	1.12464e+07	2.76122e+07	2.92283e+07	2.35038e+07	1.40701e+07	1.36407e+07	2.79618e+07	1.79962e+07	3.2714e+07	4.11144e+07	5.43503e+07	8.43487e+06	5.88076e+07	4.96575e+06	3.00363e+06	5.57758e+07	1.1242e+07	2.02894e+07	1.34575e+07	4.29484e+06	8.7095e+06	1.55772e+07	6.69142e+07	6.7324e+07	5.10444e+07	4.74672e+06	2.01325e+07	6.64258e+07
ALPHA-TOCOPHEROL	Unclassified	Unclassified		Meta_121	1.709	216.196	[M+H]+	Positive	57.14	7.32626e+06	8.56755e+06	6.44633e+06	5.74602e+06	6.25519e+06	7.93857e+06	7.69381e+06	7.87689e+06	8.73233e+06	6.18821e+06	7.0601e+06	7.06986e+06	7.68871e+06	7.60441e+06	7.49515e+06	8.19514e+06	7.74568e+06	7.34236e+06	6.78531e+06	7.53242e+06	6.9927e+06	7.32206e+06	7.49386e+06	7.46326e+06	1.95994e+06	7.32449e+06	7.98556e+06	8.24541e+06	7.17534e+06	6.95619e+06	7.34095e+06	7.38028e+06	7.88409e+06	6.39765e+06	6.50006e+06	6.17625e+06	7.33861e+06	7.92219e+06	6.87188e+06	7.79165e+06
Guaiacol	Xenobiotics	Natural Product/Food/Plant	HMDB0001398	Meta_16	2.127	107.049	[M+H-H2O]+	Positive	27.64	9.15253e+06	8.5428e+06	2.78675e+07	2.47644e+07	2.02735e+07	1.56733e+07	6.36341e+06	6.37482e+06	7.49036e+06	3.11179e+07	1.41056e+07	7.67858e+06	1.3431e+07	1.1705e+07	1.3951e+07	1.57655e+07	7.6913e+06	5.52691e+06	2.28059e+07	8.00151e+06	1.8409e+07	1.128e+07	1.10731e+07	7.65473e+06	4.82334e+06	8.47734e+06	1.66471e+06	1.21066e+07	4.449e+06	6.40811e+06	6.25677e+06	7.58572e+06	5.57842e+06	8.35722e+06	2.46885e+07	2.6221e+07	8.77591e+06	4.72958e+06	8.97446e+06	8.65425e+06
Succinic Acid-D4(Neg_NH4HCO3)	Unclassified	Unclassified		Meta_248	0.846	121.043	[M-H]-	Negative_NH4HCO3	72.37	8.24291e+06	8.23196e+06	7.27674e+06	6.95979e+06	6.62897e+06	7.70961e+06	9.48454e+06	7.84653e+06	7.84897e+06	7.38506e+06	6.30075e+06	6.77418e+06	6.97443e+06	9.37305e+06	7.89677e+06	6.78035e+06	6.16339e+06	7.30314e+06	5.68736e+06	9.04835e+06	7.38266e+06	7.44171e+06	9.68547e+06	6.12088e+06	5.05917e+06	7.8342e+06	1.26709e+07	9.05296e+06	7.61494e+06	8.10227e+06	7.07552e+06	9.0389e+06	7.92317e+06	6.54136e+06	6.09713e+06	6.49586e+06	5.89428e+06	8.48495e+06	7.73371e+06	5.337e+06
3-Methyl-2-Oxobutyrate	Amino Acid	Leucine, Isoleucine and Valine Metabolism	HMDB0000019	Meta_381	2.079	115.039	[M-H]-	Negative_FA	8.12	6.47791e+06	8.19645e+06	1.6747e+07	1.1045e+07	1.38079e+07	1.37092e+07	5.38293e+06	1.24816e+07	8.37481e+06	1.62199e+07	1.24326e+07	1.16779e+07	1.3198e+07	6.33274e+06	7.26563e+06	1.30221e+07	1.10467e+07	7.9269e+06	1.61592e+07	9.65306e+06	1.09745e+07	7.7475e+06	8.09287e+06	9.44852e+06	6.71105e+06	1.04098e+07	3.6812e+06	1.0888e+07	6.59275e+06	6.78121e+06	1.31993e+07	8.30373e+06	5.87424e+06	1.34321e+07	1.39193e+07	1.65226e+07	1.09958e+07	7.1941e+06	1.0587e+07	1.36431e+07
Phe-Leu	Peptide	Dipeptide	HMDB0253025	Meta_189	5.17	279.17	[M+H]+	Positive	21.86	6.58489e+06	8.17089e+06	2.94796e+06	1.19043e+07	2.23384e+07	1.16187e+07	1.9461e+06	341327	5.50739e+06	2.18153e+06	2.58244e+07	1.34041e+06	5.49153e+06	2.99318e+07	19319752	5.45005e+06	1.4759e+07	559224	5.19562e+06	2.76872e+06	5.6401e+06	1.77459e+07	1.33759e+07	3.47377e+06	1.48507e+06	2.90434e+06	0	1.49286e+07	2.44663e+06	3.49593e+06	3.38337e+06	2.14262e+06	6.91144e+06	4.53788e+06	4.39632e+07	2.43631e+07	2.53765e+07	994790	7.5153e+06	3.23697e+07
Choline Phosphate	Lipid	Glycerolipid and Phospholipid Metabolism	HMDB0001565	Meta_93	0.949	184.073	[M]+	Positive	16.25	1.0898e+07	7.98694e+06	9.49231e+06	1.27004e+07	6.90228e+06	1.12639e+07	4.86675e+06	1.02244e+07	8.37484e+06	9.2274e+06	2.87516e+06	6.08563e+06	1.38126e+07	2.12018e+06	2.39858e+06	7.40287e+06	6.68509e+06	5.03707e+06	7.80788e+06	3.23511e+06	1.52334e+06	4.11658e+06	7.1198e+06	5.92264e+06	1.59583e+07	3.87159e+06	3.4342e+06	7.40287e+06	4.02933e+06	4.1176e+06	4.03839e+06	5.59653e+06	5.29117e+06	4.36855e+06	8.46493e+06	9.40494e+06	8.48235e+06	5.40936e+06	1.84345e+06	1.03593e+07
1,3,7-Trimethylurate	Xenobiotics	Xanthine Metabolism	HMDB0002123	Meta_417	0.999	209.066	[M-H]-	Negative_FA	58.39	8.36457e+06	7.82026e+06	1.03959e+07	2.59214e+06	1.88818e+07	4.98588e+06	2.98562e+06	6.16156e+06	6.37551e+06	1.02592e+07	1.2111e+07	6.92717e+06	8.7e+06	6.73461e+06	6.59878e+06	8.59253e+06	6.0899e+06	3.50964e+06	1.06595e+07	5.40916e+06	8.14663e+06	9.76144e+06	9.94858e+06	3.79772e+06	1.95972e+07	5.08916e+06	808878	1.14575e+07	5.31076e+06	7.4203e+06	1.16249e+07	4.43228e+06	2.75959e+06	1.28791e+07	1.61934e+07	1.7542e+07	8.63865e+06	1.82228e+06	6.93694e+06	1.00714e+07
Dodecanoic Acid (C12:0)	Lipid	Medium Chain Fatty Acid	HMDB0000638	Meta_303	7.648	199.17	[M-H]-	Negative_NH4HCO3	364.8	1.38097e+07	7.72908e+06	7.96179e+06	8.32796e+06	8.9185e+06	7.79273e+06	8.27462e+06	9.29935e+06	7.40867e+06	8.25951e+06	7.58549e+06	9.5668e+06	1.26022e+07	7.54053e+06	7.87831e+06	1.066e+07	1.14228e+07	8.36627e+06	1.31838e+07	8.93265e+06	1.03723e+07	8.79698e+06	7.77704e+06	7.74615e+06	8.4958e+06	8.53548e+06	6.73085e+06	8.24098e+06	7.31792e+06	7.8965e+06	8.39933e+06	8.25038e+06	8.39825e+06	9.03028e+06	7.7919e+06	7.9999e+06	7.99709e+06	7.98008e+06	8.81827e+06	7.32511e+06
Suberate (C8-DC)	Lipid	Fatty Acid, Dicarboxylate	HMDB0000893	Meta_404	5.096	173.082	[M-H]-	Negative_FA	12.07	7.1447e+06	7.69949e+06	5.62683e+06	2.19204e+07	6.4464e+06	1.05314e+07	7.12677e+06	5.91422e+06	8.4261e+06	5.4231e+06	7.1132e+06	5.66092e+06	1.35628e+07	4.80699e+06	5.19686e+06	1.32673e+07	7.8672e+06	8.442e+06	1.64157e+07	8.50127e+06	5.48357e+06	5.10289e+06	4.64944e+06	5.6451e+06	4.83457e+06	4.40608e+06	4.98885e+06	4.43798e+06	5.94666e+06	4.09013e+06	7.8209e+06	4.23178e+06	5.74985e+06	7.22504e+06	6.25491e+06	6.81534e+06	9.68702e+06	4.72244e+06	5.05108e+06	1.27e+07
L-Threonine	Amino Acid	Glycine, Serine and Threonine Metabolism	HMDB0000167	Meta_26	0.95	120.066	[M+H]+	Positive	18.6	1.18823e+07	7.23526e+06	1.73961e+07	9.8296e+06	1.20121e+07	1.59648e+07	9.10137e+06	2.41787e+07	9.41177e+06	1.79124e+07	1.35407e+07	9.6911e+06	1.55143e+07	7.44091e+06	1.27541e+07	2.08574e+07	6.50926e+06	1.14181e+07	1.81963e+07	1.96605e+07	1.18302e+07	1.32145e+07	1.14202e+07	8.0104e+06	1.65593e+07	3.73517e+06	5.4541e+06	1.30153e+07	5.67521e+06	4.02335e+06	8.17435e+06	4.82404e+06	6.649e+06	9.0113e+06	1.509e+07	1.86896e+07	1.13177e+07	5.62019e+06	9.34833e+06	7.82566e+06
Pro-Ile	Peptide	Dipeptide	HMDB0304810	Meta_135	3.34	229.154	[M+H]+	Positive	11.06	1.39561e+07	7.23508e+06	3.02375e+07	1.11625e+07	1.18226e+07	1.03977e+07	1.20852e+06	9.5499e+06	4.19211e+06	2.89302e+07	2.17889e+07	1.18439e+06	2.64555e+06	9.31159e+06	1.25494e+07	9.65998e+06	1.11805e+07	2.99165e+06	1.54024e+07	4.09867e+06	9591126	1.06904e+07	1.3867e+07	3.60888e+06	770859	1.30006e+06	0	1.61395e+07	1.67436e+06	2.92906e+06	3.08115e+06	1.05217e+06	1.62381e+06	4.44679e+06	3.01463e+07	3.47113e+07	4.97471e+06	1.396e+06	2.20561e+07	5.2067e+06
Histamine	Amino Acid	Histidine Metabolism	HMDB0000870	Meta_18	0.862	112.087	[M+H]+	Positive	47.92	2.06487e+06	7.19847e+06	3.8917e+06	2.89844e+06	6.38839e+06	1.51927e+08	3.18097e+06	3.06584e+06	2.37227e+06	4.31699e+06	7.41378e+07	734043	2.14776e+07	1.26735e+07	1.35207e+07	4.55899e+07	8.3089e+06	6.48096e+06	5.98934e+07	1.7287e+06	1.54181e+07	8.33226e+06	637598	5.508e+06	7.89131e+06	1.48008e+06	31556.1	1.21166e+06	871918	1.1263e+06	4.97191e+06	1.49586e+06	7.92131e+06	5.69355e+06	3.01178e+06	3.57139e+06	7.63214e+06	1.71494e+06	1.07906e+07	1.01759e+07
Cytosine	Nucleotide	Pyrimidine Metabolism, Cytidine containing	HMDB0000630	Meta_17	0.986	112.051	[M+H]+	Positive	6.45	7.43533e+06	7.11216e+06	6.60774e+06	7.7752e+06	1.3191e+07	8.63088e+06	9.92239e+06	6.23798e+06	1.16494e+07	6.08631e+06	1.47945e+07	4.52409e+06	2.15881e+07	1.37053e+07	1.70975e+07	3.39416e+06	1.20084e+07	6.23163e+06	3.04028e+06	8.41413e+06	8.92199e+06	1.12344e+07	8.85439e+06	7.24105e+06	5.20304e+06	4.85431e+06	2.46197e+06	9.58434e+06	1.4648e+07	1.54914e+07	1.12094e+07	6.54615e+06	1.13848e+07	1.11233e+07	1.21018e+07	1.20441e+07	6.2314e+06	6.00683e+06	3.22626e+07	6.79881e+06
N-Acetylthreonine	Amino Acid	Glycine, Serine and Threonine Metabolism	HMDB0062557	Meta_73	1.01	162.076	[M+H]+	Positive	17.12	6.37615e+06	7.08053e+06	1.45728e+07	1.29139e+07	1.38204e+07	1.05138e+07	4.61079e+06	9.78738e+06	4.49289e+06	1.41679e+07	1.19813e+07	1.02099e+07	1.14841e+07	8.55133e+06	9.23905e+06	1.41965e+07	7.48701e+06	5.49478e+06	1.60232e+07	4.64172e+06	7.94634e+06	1.46653e+07	6.19011e+06	4.67219e+06	1.10002e+07	3.67646e+06	2.06157e+06	6.47551e+06	4.62946e+06	4.88543e+06	7.29932e+06	3.28144e+06	8.74969e+06	6.78627e+06	9.35128e+06	1.06636e+07	1.97906e+07	3.06972e+06	3.64029e+06	2.36036e+07
Citrulline	Amino Acid	Urea cycle; Arginine and Proline Metabolism	HMDB0000904	Meta_87	0.951	176.103	[M+H]+	Positive	68.78	1.79285e+07	7.01604e+06	3.75296e+07	1.17686e+07	3.13552e+07	1.57531e+07	1.03162e+07	3.57281e+07	1.52088e+07	3.18046e+07	4.09177e+07	1.38924e+07	1.13495e+07	3.03633e+07	3.3325e+07	1.48142e+07	1.54888e+07	6.30947e+06	1.8088e+07	2.04392e+07	2.25087e+07	3.92704e+07	2.78899e+07	8.13146e+06	2.64566e+07	1.28044e+07	3.93508e+06	3.00141e+07	1.5219e+07	1.80874e+07	1.82536e+07	1.09286e+07	9.97526e+06	2.12201e+07	4.2464e+07	4.23773e+07	1.60613e+07	5.66022e+06	3.76068e+07	1.90151e+07
Perfluorobutane Sulfonic Acid	Xenobiotics	Chemical	HMDB0246220	Meta_348	6.98	298.943	[M-H]-	Negative_NH4HCO3	468.62	7.21788e+06	6.4887e+06	5.81441e+06	4.7445e+06	5.86946e+06	6.99732e+06	6.21519e+06	5.07142e+06	4.85592e+06	5.51986e+06	5.74913e+06	6.4162e+06	4.93364e+06	6.10367e+06	6.68542e+06	8.36497e+06	5.1265e+06	7.51339e+06	8.49748e+06	6.725e+06	5.75094e+06	4.52938e+06	5.86928e+06	6.01179e+06	6.71534e+06	4.6393e+06	7.01549e+06	7.1189e+06	5.37384e+06	5.7937e+06	5.96912e+06	5.12277e+06	4.74224e+06	4.6957e+06	6.29365e+06	5.30309e+06	6.20145e+06	5.12635e+06	6.2336e+06	5.20898e+06
Ala-Ala	Peptide	Dipeptide	HMDB0003459	Meta_71	0.981	161.092	[M+H]+	Positive	12.13	9.74931e+06	6.46885e+06	1.21087e+07	6.59778e+06	1.32473e+07	8.15444e+06	3.26898e+06	6.26828e+06	4.60208e+06	1.04273e+07	1.57127e+07	4.30499e+06	7.06577e+06	1.11947e+07	1.15112e+07	4.93821e+06	1.10917e+07	2.61342e+06	7.24173e+06	3.18952e+06	1.05879e+07	7.4074e+06	7.29885e+06	1.78273e+06	2.72857e+06	3.04266e+06	878072	8.80875e+06	3.77785e+06	3.30583e+06	4.9484e+06	2.52544e+06	5.01158e+06	5.72087e+06	1.3323e+07	1.31169e+07	3.41001e+06	1.4846e+06	1.1833e+07	3.3562e+06
5,6-Dihydrouracil	Nucleotide	Pyrimidine Metabolism, Uracil containing	HMDB0000076	Meta_20	0.848	115.051	[M+H]+	Positive	2.7	7.09009e+06	5.94281e+06	6.92832e+06	7.85604e+06	7.31855e+06	1.24106e+07	4.06501e+06	8.35046e+06	9.51586e+06	7.27392e+06	5.77756e+06	5.10772e+06	8.94874e+06	5.03802e+06	8.68768e+06	1.01441e+07	6.55233e+06	4.9051e+06	8.45787e+06	5.38043e+06	6.91322e+06	7.3849e+06	1.06916e+07	7.76288e+06	7.52666e+06	3.51344e+06	9.18376e+06	9.90327e+06	6.48463e+06	5.99978e+06	6.32886e+06	4.44821e+06	1.46535e+07	5.30227e+06	5.7842e+06	9.57593e+06	1.0969e+07	5.62627e+06	9.44356e+06	9.25947e+06
Prolinamide	Xenobiotics	Natural Product/Food/Plant	HMDB0253910	Meta_22	0.964	115.087	[M+H]+	Positive	3.76	8.76014e+06	5.90634e+06	1.13875e+07	7.03663e+06	1.73887e+07	1.65857e+07	7.27663e+06	7.41786e+06	1.27126e+07	1.03024e+07	2.19385e+07	7.03483e+06	1.59562e+07	9.88425e+06	1.11365e+07	1.97859e+07	1.20453e+07	9.55071e+06	2.34546e+07	9.1607e+06	1.45415e+07	9.40262e+06	1.00167e+07	8.95502e+06	7.82559e+06	5.55008e+06	8.19524e+06	1.4703e+07	5.7394e+06	5.25244e+06	1.28614e+07	5.13018e+06	5.9469e+06	7.55918e+06	13954877	1.82106e+07	1.17182e+07	7.47405e+06	1.30334e+07	1.63553e+07
Linoleic Acid (C18:2n6)	Lipid	Long Chain Fatty Acid	HMDB0000673	Meta_342	7.986	279.233	[M-H]-	Negative_NH4HCO3	911.29	1.14902e+07	5.89115e+06	1.82843e+07	5.39323e+07	2.79698e+07	8.62645e+06	8.41283e+06	1.65856e+07	4.0715e+06	1.75656e+07	4.87067e+06	4.45016e+06	9.4748e+06	3.51395e+06	3.32598e+06	3.06621e+07	1.45825e+07	7.57659e+06	3.65087e+07	1.65043e+07	8.99993e+07	3.93895e+07	3.85963e+06	1.45811e+07	5.81875e+06	1.11844e+07	1.7767e+06	4.17461e+06	3.91286e+06	6.73394e+06	7.40932e+06	8.1069e+06	4.18257e+06	1.00543e+07	6.93978e+06	7.87012e+06	7.72589e+06	6.13739e+06	5.07996e+07	2.96023e+06
Pentadecanoic Acid (C15:0)	Lipid	Long Chain Fatty Acid	HMDB0000826	Meta_324	7.966	241.217	[M-H]-	Negative_NH4HCO3	308.22	5.95168e+06	5.88867e+06	6.44525e+06	7.10125e+06	5.45052e+06	5.75449e+06	6.16326e+06	5.13951e+06	5.2959e+06	6.28446e+06	5.28715e+06	6.25627e+06	6.0406e+06	5.71955e+06	5.85663e+06	6.88505e+06	5.65843e+06	6.08398e+06	7.24196e+06	6.23774e+06	8.01573e+06	6.15049e+06	5.69443e+06	6.0191e+06	5.43525e+06	6.53213e+06	5.17025e+06	5.89355e+06	5.41304e+06	5.97766e+06	5.65405e+06	6.54592e+06	5.44601e+06	5.98158e+06	5.54728e+06	5.58067e+06	5.74355e+06	5.44611e+06	6.74826e+06	5.60802e+06
TRANS-CINNAMATE	Unclassified	Unclassified		Meta_37	2.127	131.049	[M-H2O+H]+	Positive	43.29	7.90587e+06	5.69211e+06	2.27639e+07	2.02604e+07	1.66866e+07	1.28525e+07	4.82888e+06	4.65399e+06	5.15419e+06	2.59223e+07	1.13053e+07	5.51476e+06	1.23753e+07	1.06503e+07	1.18328e+07	1.33486e+07	6.59424e+06	4.449e+06	1.96372e+07	6.14533e+06	1.68763e+07	9.87881e+06	9.11761e+06	6.54133e+06	2.84684e+06	6.50846e+06	792658	1.04561e+07	3.42709e+06	4.99677e+06	5.202e+06	5.57078e+06	4.265e+06	5.58886e+06	2.08644e+07	2.14972e+07	7.12838e+06	3.14861e+06	7.42056e+06	7.35571e+06
Phe-Gly	Peptide	Dipeptide	HMDB0028995	Meta_131	2.628	223.108	[M+H]+	Positive	25.71	6.86119e+06	5.67707e+06	1.182e+07	1.06971e+07	1.27199e+07	7.26533e+06	2.66463e+06	3.49997e+06	2.90193e+06	9.27333e+06	1.41799e+07	318116	3.62715e+06	1.94878e+07	1.47704e+07	1.40402e+07	9.51657e+06	1.52437e+06	1.67282e+07	4.69013e+06	7.6903e+06	9.48216e+06	6.2147e+06	4.09519e+06	699406	2.82452e+06	677123	7.34561e+06	2.34909e+06	2146784	1.23687e+06	2.55074e+06	2.22907e+06	1.62931e+06	1.59245e+07	1.27023e+07	7.15862e+06	1.61793e+06	3.8131e+06	7.71271e+06
Phosphoethanolamine	Lipid	Glycerolipid and Phospholipid Metabolism	HMDB0000224	Meta_257	0.889	140.011	[M-H]-	Negative_NH4HCO3	229.89	2.96733e+06	5.55601e+06	7397.69	8.52775e+06	179340	6.56712e+06	5.34781e+06	183345	6.22359e+06	18557.5	1.56299e+06	2.56937e+06	9.04236e+06	1.38511e+06	1.00339e+06	180749	2.23601e+06	1.06154e+07	409810	5.70882e+06	4.15684e+06	305658	0	9.95968e+06	6.00235e+06	1.41349e+07	4.91343e+06	6889.8	906919	1.2503e+06	1.22952e+06	1.45678e+07	0	1.56194e+06	0	0	389346	1.0546e+07	786130	753972
Propionylcarnitine-D3	Unclassified	Unclassified		Meta_128	1.477	221.157	[M+H]+	Positive	59.45	7.43772e+06	5.49221e+06	6.40807e+06	7.68723e+06	7.18149e+06	8.14744e+06	5.67166e+06	6.47334e+06	7.35361e+06	6.57728e+06	7.30092e+06	7.31373e+06	8.07566e+06	6.45963e+06	7.84183e+06	8.2185e+06	7.73815e+06	5.69699e+06	7.33087e+06	6.43996e+06	7.26575e+06	6.77412e+06	6.43427e+06	8.27252e+06	1.99739e+06	7.29431e+06	5.36507e+06	7.44472e+06	6.91671e+06	6.63432e+06	7.76377e+06	5.448e+06	7.44866e+06	7.03896e+06	7.25632e+06	7.15406e+06	9.03545e+06	5.27011e+06	6.58228e+06	8.71951e+06
5-O-Methylvisammioside	Xenobiotics	Natural Product/Food/Plant		Meta_223	6.435	453.168	[M+H]+	Positive	238573	6.17156e+06	5.42935e+06	6.23429e+06	7.29272e+06	8.29144e+06	7.08257e+06	6.01959e+06	5.75057e+06	7.19481e+06	5.61983e+06	8.26244e+06	6.4627e+06	8.80723e+06	9.02156e+06	9.37642e+06	4.22471e+06	8.10416e+06	6.48454e+06	6.27425e+06	7.81185e+06	5.69073e+06	6.96419e+06	2.11525e+07	7.94463e+06	2.88948e+06	1.02682e+07	8.217e+06	6.91123e+06	1.26358e+07	9.78551e+06	6.63405e+06	8.07885e+06	5.74773e+06	5.88777e+06	5.87731e+06	5.63493e+06	8.28634e+06	7.62543e+06	4.90462e+06	7.50729e+06
Gly-Tyr	Peptide	Dipeptide	HMDB0028853	Meta_424	1.6	237.088	[M-H]-	Negative_FA	150.72	8.81431e+06	5.35172e+06	1.19944e+07	2.04337e+07	1.1212e+07	7.85846e+06	5.51837e+06	1.09945e+07	3.17052e+06	1.14745e+07	1.5118e+07	8.07248e+06	7.62557e+06	1.44903e+07	1.8378e+07	8.18739e+06	1.14179e+07	4.06081e+06	1.09138e+07	7.22906e+06	3.98752e+06	1.87515e+07	1.33162e+07	5.38886e+06	3.05989e+06	4.64764e+06	1.04167e+06	1.52348e+07	1.51977e+07	2.08504e+07	2.2101e+07	6.31557e+06	5.26848e+06	2.1719e+07	2.67912e+07	2.99265e+07	9.8944e+06	4.19233e+06	2.19922e+07	7.56891e+06
Threonic Acid	Cofactors and Vitamins	Ascorbate and Aldarate Metabolism	HMDB0000943	Meta_255	0.899	135.029	[M-H]-	Negative_NH4HCO3	174.11	6.1719e+06	5.0065e+06	4.69879e+06	1.29768e+07	7.9914e+06	9.24299e+06	3.76017e+06	6.97889e+06	7.09921e+06	5.28961e+06	3.76767e+06	1.03006e+07	9.4302e+06	5.64989e+06	5.48964e+06	4.83497e+06	3.3478e+06	8.37362e+06	4.7799e+06	5.63695e+06	9.76335e+06	3.63916e+06	5.96465e+06	2.96823e+06	3.92768e+06	2.4699e+06	1.31923e+06	5.43642e+06	2.24537e+06	3.81807e+06	4.73183e+06	2.17441e+06	4.77186e+06	5.82379e+06	6.46412e+06	6.13136e+06	3.40172e+06	3.0308e+06	4.5895e+06	1.84083e+06
Citric Acid	Carbohydrate	Citrate cycle (TCA cycle)	HMDB0000094	Meta_298	0.806	191.019	[M-H]-	Negative_NH4HCO3	1171.36	4.58339e+06	4.77253e+06	1.26678e+06	2.58487e+07	7.6082e+06	2.72426e+07	5.44004e+08	5.26816e+07	2.72936e+07	1.31794e+06	4.96095e+06	9.81626e+07	5.67711e+07	5.17086e+06	4.81805e+06	1.65196e+06	2.81342e+07	4.30498e+07	2.12627e+06	1.55366e+07	4.82229e+06	4.34381e+06	1.10162e+07	2.28917e+07	1014713207	1.3186e+08	1.31375e+07	1.27796e+07	2.02354e+07	2.84796e+07	281812796	1.11933e+08	1.11946e+08	2.89771e+08	2.6083e+07	2.86823e+07	1.09754e+06	1.2397e+07	5.80512e+07	1.3542e+06
2-Aminopyridine	Xenobiotics	Chemical	HMDB0245026	Meta_9	1.02	95.0608	[M+H]+	Positive	7.96	3.13526e+06	4.67057e+06	8.47561e+06	5.81745e+06	1.12862e+07	1.36443e+07	2.82249e+06	2.31559e+06	6.04661e+06	9.06288e+06	14401270	3.24705e+06	1.00446e+07	6.87237e+06	8.24955e+06	7.71154e+06	5.73876e+06	3.91125e+06	1.18578e+07	4.7581e+06	9.81338e+06	8.66806e+06	5.42276e+06	4.77711e+06	4.445e+06	1.80664e+06	1.56055e+06	6.56358e+06	2.48943e+06	2.86049e+06	3.27144e+06	1.9085e+06	3.33425e+06	3.67639e+06	1.11886e+07	9.81004e+06	1.28489e+07	2.5033e+06	4.21335e+06	1.64585e+07
4-Hydroxy-4-methyl-2-pentanone	Unclassified	Unclassified		Meta_245	3.794	115.076	[M-H]-	Negative_NH4HCO3	49.69	2.73426e+06	4.65924e+06	74757517	2.67935e+06	1.68673e+07	1.62906e+06	1.56188e+06	543542	7.65721e+06	9.05613e+07	5.13934e+07	1.64518e+06	8.94303e+06	3.89509e+07	4.35388e+07	4.20395e+07	1.18885e+06	3.85277e+06	8.19453e+07	8.97852e+06	6.37163e+06	3.45049e+06	1.12083e+07	1.10315e+06	8.15881e+06	175015	97947.4	9.92838e+06	2.46178e+06	4.97389e+06	8.19795e+06	480788	451768	1.47472e+07	4.4334e+07	4.08817e+07	2.5352e+06	530879	6.50445e+06	5.51876e+06
Stachydrine	Xenobiotics	Natural Product/Food/Plant	HMDB0004827	Meta_52	0.977	144.102	[M+H]+	Positive	272.69	1.0099e+07	4.62192e+06	2.68568e+07	6.34455e+07	1.16994e+07	1.03207e+08	1.01067e+07	3.39894e+07	8.78733e+07	2.34042e+07	3.59101e+07	1.38447e+08	3.22992e+07	6.55638e+07	7.19387e+07	1.70599e+07	1.07119e+07	1.08365e+08	1.9914e+07	8.50318e+06	7.95524e+07	1.23324e+07	5.14073e+08	2.69133e+07	1.36021e+07	7.93376e+06	1.01039e+07	553433166	6.36156e+06	4.73738e+06	5.7728e+08	7.51758e+06	5.89279e+08	6.45608e+08	9.16101e+08	9.17131e+08	2.288e+07	1.54206e+07	1.81523e+08	2.89818e+07
Cinnamic Acid	Amino Acid	Phenylalanine Metabolism	HMDB0000567	Meta_63	2.124	149.06	[M+H]+	Positive	14.1	5.41599e+06	4.6112e+06	1.66732e+07	1.38641e+07	1.25654e+07	1.01669e+07	3.68164e+06	3.64164e+06	3.87073e+06	1.93591e+07	8.72188e+06	4.12883e+06	9.01472e+06	7.76467e+06	8.88973e+06	1.02002e+07	4.84787e+06	3.1316e+06	1.49371e+07	4.97196e+06	1.19684e+07	7.64626e+06	7.40334e+06	4.77791e+06	2.0914e+06	5.24989e+06	930240	7.22678e+06	3.09743e+06	3.56826e+06	4.03974e+06	3.99837e+06	3.20059e+06	4.1207e+06	1.56622e+07	1.61413e+07	5.67052e+06	2.54231e+06	5.4953e+06	5.34038e+06
Succinic Acid	Carbohydrate	Citrate cycle (TCA cycle)	HMDB0000254	Meta_247	0.847	117.018	[M-H]-	Negative_NH4HCO3	226.96	1.58978e+07	4.20642e+06	1.30997e+08	6.52185e+06	1.23176e+08	4.44507e+07	3.32926e+06	3.02184e+08	1.2328e+07	1.3203e+08	1.8047e+07	2.98662e+08	4.69819e+07	3.57278e+07	4.01566e+07	3.31372e+06	5.58387e+06	6.88325e+07	3.42546e+06	2.58546e+07	1.94173e+07	7.50729e+07	6.11377e+07	4.13332e+06	8.64717e+08	5.79557e+06	1.26678e+06	6.04774e+07	9.38715e+06	1.50101e+07	5.29638e+07	5.12311e+06	3.90889e+07	5.87052e+07	1.14525e+08	1.14529e+08	2.92115e+08	2.89119e+06	6.19479e+06	3.84147e+08
Mestranol	Unclassified	Unclassified		Meta_356	7.794	309.175	[M-H]-	Negative_NH4HCO3	231.64	4.31639e+06	4.20536e+06	3.64905e+06	6.26207e+06	3.68231e+06	4.49203e+06	4.5115e+06	3.12489e+06	3.48177e+06	3.90722e+06	3.71601e+06	3.06121e+06	4.5985e+06	3.34505e+06	3.18573e+06	7.26342e+06	1.1302e+07	5.90607e+06	8.54421e+06	5.24159e+06	5.27736e+06	4.40851e+06	3.51735e+06	3.04662e+06	4.27513e+06	3.066e+06	2.55558e+06	2.93789e+06	2.36961e+06	3.05424e+06	3.46374e+06	3.03293e+06	2.66985e+06	4.30088e+06	3.42047e+06	3.41786e+06	3.61954e+06	3.23838e+06	3.9789e+06	3.61045e+06
Gamma-Glutamylglutamate	Peptide	Gamma-glutamyl Amino Acid	HMDB0011737	Meta_187	0.988	277.103	[M+H]+	Positive	27.36	3.48944e+06	4.15773e+06	1.19095e+07	2.87787e+06	7.79282e+06	6.92772e+06	2.05001e+06	1.38523e+06	6.02912e+06	9.38784e+06	1.49879e+07	5.95328e+06	5.03115e+06	8.9495e+06	8.96703e+06	6.13631e+06	5.27398e+06	3.76666e+06	7.18432e+06	5.33484e+06	7.44933e+06	5.40286e+06	5.55456e+06	4.34407e+06	1.88005e+06	5.59965e+06	930840	5.51345e+06	5.44896e+06	4.9801e+06	4.73258e+06	5.30531e+06	2.85e+06	5.48964e+06	8.64112e+06	8.59097e+06	5.68829e+06	2.78468e+06	7.11123e+06	8.0962e+06
L-Norvaline	Amino Acid	Other Amino Acid Metabolism	HMDB0013716	Meta_246	1.08	116.071	[M-H]-	Negative_NH4HCO3	95.17	5.37439e+06	4.13715e+06	6.91659e+07	7.20015e+06	2.21908e+07	2.06235e+07	3.05652e+06	2.59375e+06	4.46467e+06	6.96848e+07	2.69666e+07	4.14242e+06	8.71949e+06	1.11334e+07	1.38232e+07	2.53916e+07	4.90885e+06	4.78078e+06	3.2447e+07	6.94177e+06	2.4393e+07	1.28569e+07	1.57629e+07	2.36675e+06	2.03082e+07	2.17399e+06	540719	1.67243e+07	2.38715e+06	4.19646e+06	5.72874e+06	2.26886e+06	3.59347e+06	6.32634e+06	4.14644e+07	3.71136e+07	9.37788e+06	1.70387e+06	6.92453e+06	7.57974e+06
Pyroglutamine	Amino Acid	Alanine, Aspartate and Glutamate Metabolism	HMDB0062558	Meta_34	0.967	129.066	[M+H]+	Positive	7.72	7.95128e+06	4.10909e+06	6.03807e+06	4.32242e+06	5.60208e+06	8.45664e+06	3.29387e+06	1.60937e+07	6.90609e+06	5.96766e+06	6.40936e+06	6.2004e+06	7.28157e+06	3.62191e+06	4.19559e+06	6.05272e+06	7.91301e+06	4.51188e+06	5.36829e+06	3.62058e+06	5.68766e+06	8.63507e+06	3.13489e+06	4.40843e+06	6.60008e+06	4.18311e+06	3.25118e+06	4.24125e+06	5.10265e+06	3.85004e+06	6.55886e+06	2.83845e+06	3.72277e+06	4.56822e+06	4.73918e+06	8.29769e+06	8.67162e+06	2.68866e+06	6.94975e+06	9.67999e+06
Theobromine	Xenobiotics	Xanthine Metabolism	HMDB0002825	Meta_91	2.004	181.072	[M+H]+	Positive	23.77	1.35997e+06	3.96789e+06	1.95308e+08	1.41142e+08	268220888	1.25355e+08	7.97433e+06	5.43494e+06	5.85566e+07	2.07568e+08	699353	6.96055e+06	2.26555e+07	486475	801447	1.45656e+07	1.39603e+06	1.83352e+07	1.95585e+07	1.29477e+07	754142	1.31402e+08	7.92142e+06	1.12522e+06	1.28365e+06	2.65232e+06	483951	8.68362e+06	1.30241e+06	720049	1.71379e+07	1.81469e+06	5.94776e+06	2.18304e+07	1.69804e+07	1.49823e+07	1.27556e+06	1.09512e+06	9.41633e+06	864145
Thymine	Nucleotide	Pyrimidine Metabolism, Thymine containing	HMDB0000262	Meta_33	1.639	127.05	[M+H]+	Positive	14.64	3.58713e+06	3.92154e+06	3.89904e+06	3.66952e+06	5.86538e+06	5.02107e+06	2.77837e+06	2.13756e+06	2.85791e+06	2.57397e+06	6.89778e+06	2.23872e+06	2.89447e+06	5.22029e+06	5.33012e+06	2.78532e+06	3.77836e+06	1.41531e+06	3.47837e+06	1.96748e+06	7.62343e+06	4.05116e+06	1.98255e+06	2.01232e+06	1.31651e+06	2.31143e+06	2.06165e+06	2.6764e+06	3.18169e+06	3.82852e+06	1.91026e+06	2.04742e+06	2.6189e+06	2.16864e+06	3.35349e+06	3.18995e+06	2.61166e+06	1.6859e+06	3.73917e+06	2.3368e+06
Leu-Val	Peptide	Dipeptide	HMDB0028942	Meta_137	3.321	231.17	[M+H]+	Positive	27.59	3.43049e+06	3.91917e+06	7.5626e+06	8.23406e+06	2.6147e+07	1.19168e+07	2.74166e+06	197716	4.17086e+06	6.20472e+06	2.92159e+07	3.50443e+06	1.0441e+07	2.8674e+07	2.12171e+07	3.91929e+06	9.04471e+06	336668	3.81665e+06	4.12893e+06	9.21924e+06	3.4727e+07	6.76754e+06	6.5168e+06	1.05002e+06	6.13274e+06	0	7.9501e+06	2.68667e+06	3.1658e+06	1.0781e+07	4.25453e+06	5.60351e+06	1.44593e+07	1.79704e+07	1.31606e+07	1.65621e+07	2.38188e+06	1.96028e+07	1.77203e+07
N-Acetylglucosamine 1-phosphate	Carbohydrate	Amino sugar and Nucleotide sugar Metabolism	HMDB0001367	Meta_433	0.955	300.04	[M-H]-	Negative_FA	16.3	2.11584e+06	3.90881e+06	2.2611e+06	2.06692e+06	1.04194e+07	1.9313e+06	1.0884e+06	1.96244e+06	2.06356e+06	1.80902e+06	4.8849e+06	1.95461e+06	2.4167e+06	2.7331e+06	2.59213e+06	3.38358e+06	1.81062e+06	2.05685e+06	4.53231e+06	2.73231e+06	3.14613e+06	4.94057e+06	2.4035e+06	726059	2.89206e+06	1.39935e+06	211161	2.58978e+06	1.06137e+06	1.52293e+06	1.59507e+06	1.05382e+06	1.95189e+06	2.34456e+06	3.07259e+06	3.86719e+06	2.29748e+06	251350	1.69342e+06	2.02353e+06
Glucose 6-Phosphate/Fructose 6-Phosphate	Carbohydrate	Glycolysis, Gluconeogenesis, and Pyruvate Metabolism	HMDB0001401	Meta_333	0.844	259.022	[M-H]-	Negative_NH4HCO3	323.02	6.80789e+06	3.88944e+06	4.47755e+06	1.34031e+07	9.63266e+06	6.29254e+06	3.80403e+06	2.48632e+07	4.71879e+06	4.30077e+06	7.95172e+06	1.82325e+07	1.00989e+07	3.14578e+06	2.88366e+06	2.7371e+06	1.6772e+07	4.25789e+06	3.66663e+06	3.74678e+06	6.86635e+06	1.82995e+07	4.04875e+06	3.54267e+06	2.02771e+07	2.77229e+06	508312	4.22428e+06	6.0826e+06	8.42431e+06	6.55734e+06	2.44237e+06	9.22345e+06	7.30788e+06	8.07011e+06	8.21773e+06	7.9857e+06	2.0895e+06	5.61984e+06	1.10687e+07
Cyclo(L-Val-L-Pro)	Peptide	Dipeptide	HMDB0240493	Meta_106	3.69	197.128	[M+H]+	Positive	15.76	3.75618e+06	3.87514e+06	1.16599e+07	1.28705e+07	1.74331e+07	7.96871e+06	3.98372e+06	1.23742e+06	2.57637e+06	1.25006e+07	2.47572e+06	4.61528e+06	8.44586e+06	2.11002e+06	1.92854e+06	3.64728e+06	4.78448e+06	4.00775e+06	5.24449e+06	2.50181e+06	5.22722e+06	4.22874e+06	1.30141e+06	3.10696e+06	1.08527e+06	3.72544e+06	941349	1.31558e+06	6.01164e+06	8.46862e+06	3.22356e+06	3.02848e+06	901618	3.72107e+06	3.1029e+06	3.061e+06	5.0796e+06	1.98097e+06	1.87387e+06	6.16345e+06
Decanoic Acid (C10:0)	Lipid	Medium Chain Fatty Acid	HMDB0000511	Meta_281	7.424	171.138	[M-H]-	Negative_NH4HCO3	108.75	4.44828e+06	3.7431e+06	3.97763e+06	5.05571e+06	4.18438e+06	4.64859e+06	4.02734e+06	4.71989e+06	3.37372e+06	4.48688e+06	3.44123e+06	4.31081e+06	4.58087e+06	3.9187e+06	3.58406e+06	9.64289e+06	4.06549e+06	4.09703e+06	1.37475e+07	4.17685e+06	4.24418e+06	3.26743e+06	4.0976e+06	3.61165e+06	4.14816e+06	3.66056e+06	3.25419e+06	3.81996e+06	3.10061e+06	4.16977e+06	3.98675e+06	4.53849e+06	3.65275e+06	3.82322e+06	4.3507e+06	3.73706e+06	3.77715e+06	3.81016e+06	3.67548e+06	3.62358e+06
Prolinamide	Xenobiotics	Natural Product/Food/Plant	HMDB0253910	Meta_21	0.876	115.087	[M+H]+	Positive	4.45	6.23274e+06	3.5742e+06	9.22287e+06	5.28567e+06	1.52996e+07	3.11136e+06	3.04114e+06	6.12366e+06	4.05851e+06	9.72394e+06	8.83015e+06	4.83301e+06	8.25127e+06	6.75393e+06	8.0553e+06	6.19981e+06	8.63783e+06	3.19142e+06	6.593e+06	7.12176e+06	7.35226e+06	8.92223e+06	1.01205e+07	3.3576e+06	5.86293e+06	6.1083e+06	1.57416e+06	1.22588e+07	6.84994e+06	7.47904e+06	9.92121e+06	5.77629e+06	3.35864e+06	9.88342e+06	1.55577e+07	1.6994e+07	7.75456e+06	2.51495e+06	1.12001e+07	7.31745e+06
Phenol Sulfate	Amino Acid	Tyrosine Metabolism	HMDB0060015	Meta_282	2.851	172.991	[M-H]-	Negative_NH4HCO3	194.88	2.80755e+06	3.50938e+06	5.61158e+06	6.07516e+06	8.31872e+06	7.5042e+06	2.55017e+06	691388	3.37223e+06	6.28667e+06	4.455e+06	3.27337e+06	1.31996e+07	5.61245e+06	5.33059e+06	5.61809e+06	2.60679e+06	5.61923e+06	8.40091e+06	1.32983e+06	2.24259e+07	1.9221e+06	2.55034e+06	3.51502e+06	1.26595e+07	6.7149e+06	451216	2.89818e+06	2.54993e+06	4.46567e+06	1.25489e+07	6.0381e+06	1.20214e+06	1.47039e+07	6.81989e+06	6.39011e+06	8.03945e+06	1.67157e+06	1.48525e+06	1.20312e+07
N-Carbamoyl-L-Aspartate	Nucleotide	Purine and Pyrimidine Metabolism	HMDB0000828	Meta_407	1.007	175.036	[M-H]-	Negative_FA	14.48	3.70157e+06	3.50283e+06	4.23723e+06	1.59119e+06	6.75508e+06	5.71682e+06	2.22234e+06	2.20339e+06	2.87253e+06	4.72252e+06	8.02849e+06	3.81325e+06	4.5202e+06	4.69406e+06	4.31171e+06	4.82211e+06	2.9593e+06	1.28881e+06	5.30135e+06	2.20795e+06	4.4355e+06	5.65089e+06	2.89736e+06	1.54434e+06	896856	1.05645e+06	915415	2.4855e+06	1.64315e+06	1.74887e+06	3.35405e+06	1.17353e+06	1.37345e+06	2.97091e+06	5.53085e+06	4.56224e+06	2.81075e+06	1.21554e+06	1.6052e+06	6.22352e+06
L-Histidine	Amino Acid	Histidine Metabolism	HMDB0000177	Meta_268	0.986	154.062	[M-H]-	Negative_NH4HCO3	157.32	4.16956e+06	3.43811e+06	4.45351e+06	9.21445e+06	8.76996e+06	5.44544e+06	4.43754e+06	3.98566e+06	4.38363e+06	5.21291e+06	7.27626e+06	6.42975e+06	6.00548e+06	4.05987e+06	5.15426e+06	4.37052e+06	7.57228e+06	3.27348e+06	5.31405e+06	5.44871e+06	3.51726e+06	2.21513e+07	5.74441e+06	6.36412e+06	3.79277e+07	3.93784e+06	1.59393e+06	7.22231e+06	5.13063e+06	5.66674e+06	5.42454e+06	4.41273e+06	5.69583e+06	4.38211e+06	8.47824e+06	1.261e+07	6.73376e+06	3.71702e+06	1.14724e+07	9.9372e+06
Leu-Ala	Peptide	Dipeptide	HMDB0028922	Meta_108	1.696	203.139	[M+H]+	Positive	30.11	1.91936e+06	3.26779e+06	1.13506e+06	6.16597e+06	9.35394e+06	6.30343e+06	908589	127180	2.75325e+06	747099	1.80764e+07	554911	2.47817e+06	1.36077e+07	7.11364e+06	1.94802e+06	4.52651e+06	577711	1.4661e+06	922716	6.44018e+06	8.7465e+06	3.99288e+06	2.65359e+06	334186	1.15253e+06	0	4.43484e+06	569582	695067	1.41399e+06	769146	1521556	2.1875e+06	1.52317e+07	5.77369e+06	3.4022e+06	836827	5.44111e+06	4.16434e+06
Sebacate (C10-DC)	Lipid	Fatty Acid, Dicarboxylate	HMDB0000792	Meta_416	5.894	201.113	[M-H]-	Negative_FA	40.49	3.23591e+06	3.17923e+06	2.88496e+06	1.45093e+07	5.31529e+06	3.67852e+06	3.05187e+06	3.73779e+06	3.59783e+06	3.26977e+06	3.88577e+06	2.96035e+06	4.76718e+06	2.56566e+06	2.58829e+06	5.36258e+06	5.09895e+06	3.7034e+06	6.38409e+06	3.52126e+06	3.85975e+06	1.05816e+07	3.20504e+06	3.39313e+06	2.11268e+06	2.30344e+06	2.31382e+06	3.00933e+06	3.87358e+06	3.62509e+06	3.25262e+06	2.34601e+06	2.61644e+06	3.19223e+06	3.35499e+06	4.10837e+06	5.14635e+06	2.47938e+06	3.12866e+06	7.08302e+06
N-Acetyl-L-Aspartic Acid	Amino Acid	Alanine, Aspartate and Glutamate Metabolism	HMDB0000812	Meta_284	0.884	174.04	[M-H]-	Negative_NH4HCO3	490.01	1.22007e+06	3.15646e+06	4.05681e+06	1.54205e+06	1.69592e+07	2.63765e+07	2.14767e+06	2.21265e+06	6.64276e+06	4.46188e+06	1.30084e+07	2.60743e+07	7.11897e+06	989801	1.05043e+06	2.02046e+07	2.45388e+06	5.67546e+06	2.15703e+07	4.13718e+06	5.80804e+06	1.21692e+07	8.6078e+06	1.34361e+06	9.49311e+06	1.97373e+06	396870	9.58797e+06	1.04171e+06	1.18882e+06	8.91098e+06	1.6867e+06	5.4544e+06	1.25246e+07	1.64774e+07	1.3144e+07	2.67001e+07	576104	950360	2.06801e+07
Paraxanthine	Xenobiotics	Xanthine Metabolism	HMDB0001860	Meta_90	2.785	181.072	[M+H]+	Positive	11.1	2.04297e+06	3.14115e+06	1.3711e+07	1.45313e+07	2.99699e+07	6.82459e+07	1.89139e+07	1.30267e+06	6.26958e+06	1.45975e+07	1.39728e+06	1.27592e+06	5.66841e+06	640504	611186	4.93601e+07	1.07113e+06	2.02912e+06	6.42385e+07	1.9415e+07	369037	6.84609e+07	1.1982e+06	1.37959e+06	990272	851750	520921	1.22324e+06	284122	631953	2.03798e+06	1.13721e+06	1.3387e+06	1.93764e+06	2.77215e+06	2.2455e+06	626963	830703	2.77723e+06	2.12785e+06
Propionylcarnitine	Lipid	Fatty Acid Metabolism (Acyl Carnitine)	HMDB0000824	Meta_124	1.479	218.138	[M+H]+	Positive	21.22	3.25354e+06	3.12149e+06	3.72012e+06	1.04865e+07	5.0706e+06	8.81146e+06	4.53172e+06	2.91965e+06	5.67684e+06	3.89728e+06	4.94919e+06	1.41352e+07	1.63004e+07	2.52662e+06	3.66348e+06	9.44247e+06	4.72357e+06	3.67778e+06	1.24545e+07	2.04562e+06	6.37432e+06	1.15195e+07	2.50452e+06	4.6065e+06	2.92016e+06	8.44478e+06	571859	3.12728e+06	3.00062e+06	3.47666e+06	1.24615e+07	5.52092e+06	5.09772e+06	1.33915e+07	6.52303e+06	6.89025e+06	1.35791e+07	1.4198e+06	4.677e+06	1.88861e+07
N,N,N-Trimethyl-5-Aminovalerate	Amino Acid	Lysine Metabolism	HMDB0240732	Meta_70	1.015	160.133	[M+H]+	Positive	30.08	4.18193e+06	3.0782e+06	7.28715e+06	1.26278e+07	6.65528e+06	1.28639e+07	5.18837e+06	1.97603e+07	7.95677e+06	6.38045e+06	6.9282e+06	8.49824e+06	1.79899e+07	6.04083e+06	6.6201e+06	6.62253e+06	2.18094e+06	6.4185e+06	8.88885e+06	5.91427e+06	1.14975e+07	4.68888e+06	3.91277e+06	8.73665e+06	1.85973e+06	9.98349e+06	1.04184e+06	4.27467e+06	2.14752e+06	2.86261e+06	7.37977e+06	9.47729e+06	3.25522e+06	7.95831e+06	8.12656e+06	7.72122e+06	9.131e+06	4.58068e+06	1.12554e+07	1.12198e+07
Propionylglycine	Lipid	Fatty Acid Metabolism (Acyl glycines)	HMDB0000783	Meta_389	1.354	130.05	[M-H]-	Negative_FA	10.85	3.81051e+06	3.07122e+06	5.44198e+06	5.10553e+06	4.97444e+06	6.15001e+06	3.55488e+06	4.31604e+06	5.30425e+06	5.36457e+06	4.30294e+06	3.2028e+06	5.34935e+06	2.76378e+06	4.18088e+06	5.35058e+06	3.64511e+06	4.3738e+06	6.11483e+06	3.02461e+06	3.95126e+06	4.36873e+06	2.92965e+06	3.29785e+06	3.64131e+06	3.33883e+06	3.3516e+06	2.95019e+06	2.17196e+06	3.58066e+06	2.66992e+06	3.31102e+06	4.36314e+06	3.24128e+06	4.85473e+06	4.78273e+06	4.81571e+06	3.63252e+06	3.99145e+06	6.40568e+06
Palmitoleic Acid (C16:1)	Lipid	Long Chain Fatty Acid	HMDB0003229	Meta_330	7.926	253.217	[M-H]-	Negative_NH4HCO3	262.01	4.51407e+06	3.06632e+06	7.89118e+06	1.24064e+07	8.2172e+06	4.97171e+06	5.58966e+06	5.38537e+06	3.57184e+06	7.34268e+06	4.117e+06	4.57245e+06	6.46211e+06	3.30337e+06	3.243e+06	2.37898e+07	4.66272e+06	6.58093e+06	2.78658e+07	1.06959e+07	3.32949e+07	5.7523e+06	3.52925e+06	8.44619e+06	4.6375e+06	6.34614e+06	2.49676e+06	3.15482e+06	4.20537e+06	5.62781e+06	5.40756e+06	5.17002e+06	3.39822e+06	6.61329e+06	4.24771e+06	4.41002e+06	3.51067e+06	5e+06	1.62502e+07	2.71723e+06
Glycerol 3-Phosphate	Lipid	Glycerolipid and Phospholipid Metabolism	HMDB0000126	Meta_280	0.849	171.006	[M-H]-	Negative_NH4HCO3	110	3.97088e+06	3.02183e+06	2.41567e+06	1.31672e+07	1.14181e+07	9.55429e+06	4.17088e+06	1.2991e+07	6.32333e+06	2.41595e+06	5.29865e+06	9.28877e+06	1.28637e+07	1.05904e+07	8.15075e+06	3.05304e+06	6.73976e+06	3.99963e+06	3.88064e+06	3.95318e+06	7.26123e+06	7.27132e+06	2.17716e+06	8.34876e+06	8.62987e+06	7.30819e+06	995045	2.44933e+06	3.4846e+06	5.34038e+06	8.48491e+06	6.20084e+06	5.65132e+06	1.02523e+07	4.55172e+06	4.46956e+06	4.8312e+06	4.5974e+06	7.97717e+06	6.33924e+06
Arachidate (C20:0)	Lipid	Long Chain Fatty Acid	HMDB0002212	Meta_358	8.741	311.296	[M-H]-	Negative_NH4HCO3	104.34	3.27664e+06	2.94287e+06	3.05685e+06	5.42995e+06	2.91933e+06	2.74622e+06	3.59998e+06	2.62335e+06	2.5094e+06	3.13128e+06	2.92673e+06	3.047e+06	3.20753e+06	2.54126e+06	3.05756e+06	3.01969e+06	2.55993e+06	2.75668e+06	2.84117e+06	3.34527e+06	4.5695e+06	3.38681e+06	3.47386e+06	3.22475e+06	2.77935e+06	4.49297e+06	3.11749e+06	3.36255e+06	2.81009e+06	3.95765e+06	3.17287e+06	4.07969e+06	2.79566e+06	3.42823e+06	3.64631e+06	3.23575e+06	2.89454e+06	3.33283e+06	4.12405e+06	2.67815e+06
Ectoine	Xenobiotics	Natural Product/Food/Plant	METPA0797	Meta_50	0.99	143.082	[M+H]+	Positive	30.99	3.28134e+06	2.8526e+06	2.93707e+06	1.78607e+06	2.76447e+06	2.34595e+06	1.66429e+06	3.84746e+06	2.92411e+06	1.49805e+06	5.3361e+06	2.36695e+06	2.94065e+06	1.87466e+06	2.29657e+06	6.17819e+06	1.9736e+06	1.83939e+06	6.34828e+06	2.00401e+06	2.2664e+06	2.6071e+06	2.07881e+06	2.11033e+06	7.72894e+06	1.97564e+06	1.69493e+06	3.6457e+06	1.39106e+06	1.50223e+06	1.04729e+06	2.30512e+06	2.20454e+06	1.8355e+06	4.57601e+06	3.35953e+06	5.84039e+07	1.62411e+06	3.3075e+06	8.09009e+07
Malic Acid	Carbohydrate	Citrate cycle (TCA cycle)	HMDB0000156	Meta_254	0.831	133.013	[M-H]-	Negative_NH4HCO3	487.08	3.37494e+06	2.7887e+06	9.84273e+06	5.59621e+06	1.33228e+07	1.23557e+07	4.31788e+06	100036874	1.2085e+07	9.41833e+06	1.44768e+06	3.20047e+08	4.92246e+06	3.36382e+06	3.42246e+06	1.73332e+06	2.12339e+06	8.63682e+06	1.86028e+06	6.83869e+06	2.54668e+06	4.19951e+06	3.26483e+06	3.5706e+06	1083941134	5.00487e+06	2.79653e+06	3.50908e+06	3.88102e+06	5.85058e+06	3.76418e+07	4.49589e+06	6.017e+06	4.15086e+07	4.19257e+06	4.57863e+06	5.18542e+06	2.09624e+06	2.3273e+06	5.96824e+06
L-Tyrosine-D4(Neg_NH4HCO3)	Unclassified	Unclassified		Meta_291	1.223	184.091	[M-H]-	Negative_NH4HCO3	148.84	2.80139e+06	2.73803e+06	2.41109e+06	2.36878e+06	2.54294e+06	2.4742e+06	2.74715e+06	2.11485e+06	2.55164e+06	2.37388e+06	2.33092e+06	2.71163e+06	2.41757e+06	3.24958e+06	2.76111e+06	2.5575e+06	2.41525e+06	2.76033e+06	2.35287e+06	2.56437e+06	2.6403e+06	2.62604e+06	2.94073e+06	2.53639e+06	2.37371e+06	2.89174e+06	3.17082e+06	2.87299e+06	2.49708e+06	2.72894e+06	2.64543e+06	2.84057e+06	2.61073e+06	2.33057e+06	2.31828e+06	2.07106e+06	2.20845e+06	2.76405e+06	2.46539e+06	2.13542e+06
Methylmalonylglycine	Lipid	Fatty Acid Metabolism (Acyl glycines)		Meta_405	1.116	174.04	[M-H]-	Negative_FA	21.76	4.11649e+06	2.66526e+06	2.97913e+06	5.17299e+06	9.5205e+06	5.81519e+06	4.07122e+06	4.90713e+06	2.80476e+06	2.77382e+06	7.29892e+06	1.0373e+07	4.48657e+06	3.00746e+06	3.29195e+06	4.9946e+06	2.20454e+06	3.62387e+06	5.93881e+06	8.397e+06	3.2063e+06	6.70507e+06	3.21496e+06	2.36338e+06	7.76778e+06	4.24625e+06	1.07336e+06	4.25132e+06	3.1972e+06	3.75492e+06	6.66979e+06	3.89372e+06	4.68327e+06	6.93283e+06	7.88898e+06	8.30154e+06	1.03997e+07	1.73881e+06	3.90481e+06	1.3198e+07
2-Hydroxypalmitate	Lipid	Fatty Acid, Monohydroxy	HMDB0031057	Meta_339	7.954	271.227	[M-H]-	Negative_NH4HCO3	129.43	2.66185e+06	2.59684e+06	2.66678e+06	3.70711e+06	2.47393e+06	3.01887e+06	2.59631e+06	2.13981e+06	2.46981e+06	2.30642e+06	2.4461e+06	2.53141e+06	2.88584e+06	2.45886e+06	2.461e+06	3.47388e+06	2.34443e+06	2.53932e+06	3.21494e+06	2.74782e+06	4.05967e+06	3.24748e+06	2.48399e+06	2.99077e+06	2.73781e+06	3.00286e+06	2.2718e+06	2.7424e+06	2.21891e+06	2.6249e+06	2.77439e+06	2.89614e+06	2.18882e+06	2.76646e+06	2.39931e+06	2.27463e+06	2.53484e+06	2.70325e+06	3.43446e+06	2.53378e+06
Octanoic Acid (C8:0)	Lipid	Medium Chain Fatty Acid	HMDB0000482	Meta_258	7.056	143.107	[M-H]-	Negative_NH4HCO3	80.16	2.67727e+06	2.53574e+06	3.77629e+06	3.87386e+06	3.57253e+06	3.61387e+06	1.71122e+06	2.10674e+06	2.27877e+06	3.4186e+06	2.11257e+06	2.92141e+06	3.69623e+06	2.49734e+06	2.58575e+06	1.11684e+07	3.22903e+06	2.40526e+06	1.67513e+07	2.85278e+06	3.38185e+06	1.86518e+06	2.52277e+06	2.40564e+06	2.66177e+06	2.64937e+06	1.02947e+06	2.08653e+06	1.26595e+06	2.71295e+06	2.24554e+06	3.63145e+06	2.54088e+06	2.58051e+06	2.61521e+06	2.05542e+06	2.16463e+06	2.28399e+06	2.3669e+06	1.71448e+06
Salicylic acid	Xenobiotics	Drug	HMDB0001895	Meta_395	3.543	137.024	[M-H]-	Negative_FA	10.29	2.39574e+06	2.51015e+06	3.0171e+06	1.18818e+07	3.34687e+06	5.02466e+06	1.83159e+06	1.54176e+06	2.38886e+06	2.42257e+06	3.15195e+06	1.74981e+06	1.99388e+06	3.34013e+06	3.32625e+06	2.7098e+06	3.59609e+06	2.76399e+06	2.7386e+06	2.26727e+06	1.95407e+07	2.5486e+06	2.01539e+06	3.89213e+06	1.68434e+06	2.90755e+06	2.52768e+06	3.4323e+06	2.5555e+06	3.33552e+06	2.44177e+06	2.83356e+06	2.00765e+06	2.25909e+06	4.03274e+06	3.62631e+06	4.59306e+06	2.73403e+06	4.71277e+06	5.13775e+06
Uridine	Nucleotide	Pyrimidine Metabolism, Uracil containing	HMDB0000296	Meta_325	1.242	243.062	[M-H]-	Negative_NH4HCO3	44.61	3.18302e+06	2.49884e+06	1.38139e+06	1.07065e+07	1.49005e+06	2.27605e+06	1.38942e+06	852507	1.16002e+06	1.44181e+06	1.44021e+06	916058	2.42356e+06	2.34735e+06	2.31396e+06	764396	1.86906e+06	1.1612e+06	1.06754e+06	1.03248e+06	2.02064e+06	2.48988e+06	2.90944e+06	832628	1.00453e+06	1.552e+06	8105.45	2.90775e+06	2.19333e+06	3.08488e+06	2.05439e+06	1.49665e+06	2.08101e+06	2.08097e+06	4.03172e+06	4.27606e+06	1.175e+06	546079	6.13544e+06	1.05481e+06
Glycerol	Lipid	Glycerolipid and Phospholipid Metabolism	HMDB0000131	Meta_235	1.992	91.0212	[M-H]-	Negative_NH4HCO3	32.76	2.69663e+06	2.37902e+06	1.87954e+06	2.15563e+06	1.82234e+06	4.7393e+06	1.32793e+06	1.92418e+06	910764	3.04743e+06	1.41789e+06	3.57521e+06	2.08262e+06	3.13794e+06	1.75132e+06	2.18444e+06	3.48736e+06	2.4153e+06	2.85184e+06	2.25383e+06	2.58403e+06	363812	4.25474e+06	1.7149e+06	2.79857e+06	1.59831e+06	3.11065e+06	3.5887e+06	1.83547e+06	2.65881e+06	1.35632e+06	3.66276e+06	2.55683e+06	3.37998e+06	1.23449e+06	2.16594e+06	1.73983e+06	849310	1.63838e+06	1.7829e+06
Oxoglutaric Acid	Carbohydrate	Citrate cycle (TCA cycle)	HMDB0000208	Meta_260	0.847	145.013	[M-H]-	Negative_NH4HCO3	40.87	1.08224e+06	2.37032e+06	3.37318e+06	1.43874e+06	2.18572e+06	2.43683e+06	1.13338e+06	1.06777e+07	1.13238e+06	3.75657e+06	2.19153e+06	5.53783e+06	2.17108e+06	554442	774384	1.72772e+06	2.88123e+06	2.12634e+06	2.0577e+06	2.86425e+06	1.39949e+06	807038	1.06389e+06	2.43959e+06	5.85256e+06	1.09427e+06	1.0262e+06	924764	596621	846893	960646	993708	602438	2.14276e+06	1.03265e+06	1.63698e+06	1.37942e+06	1.66746e+06	712279	1.95483e+06
Undecanedioate (C11-DC)	Lipid	Fatty Acid, Dicarboxylate	HMDB0000888	Meta_420	6.075	215.129	[M-H]-	Negative_FA	24.33	2.45082e+06	2.35959e+06	2.18119e+06	5.0271e+06	2.66693e+06	3.34321e+06	2.31323e+06	1.96505e+06	2.67186e+06	1.90009e+06	3.27086e+06	2.16752e+06	3.52271e+06	1.76005e+06	2.0382e+06	3.79386e+06	4.43299e+06	2.95809e+06	4.50051e+06	2.51892e+06	2.14201e+06	2.24485e+06	2.23719e+06	2.40994e+06	1.66717e+06	1.60785e+06	1.81858e+06	2.28238e+06	2.25123e+06	1.65413e+06	3.44552e+06	1.83207e+06	2.27501e+06	3.28883e+06	2.70421e+06	3.11464e+06	4.11014e+06	1.94984e+06	2.39115e+06	5.3764e+06
Succinylglycine	Lipid	Fatty Acid Metabolism (Acyl glycines)		Meta_406	0.949	174.041	[M-H]-	Negative_FA	52.05	933897	2.32025e+06	2.3964e+06	328618	1.14072e+07	1.69614e+07	757197	1.62953e+06	6.55853e+06	2.03601e+06	1.1575e+07	1.74199e+07	5.23512e+06	461645	377923	1.51341e+07	2.41234e+06	4.03956e+06	1.59502e+07	4.30201e+06	3.55003e+06	1.02449e+07	7.83744e+06	497037	5.60868e+06	38787.5	389108	8.43329e+06	536178	1.02172e+06	7.22193e+06	0	4.7027e+06	9.90333e+06	1.35608e+07	1.28911e+07	2.25818e+07	443027	283563	2.11719e+07
Piperine	Xenobiotics	Natural Product/Food/Plant	HMDB0029377	Meta_195	6.373	286.143	[M+H]+	Positive	52480.2	2.47141e+06	2.29324e+06	0	0	0	0	0	0	0	0	0	0	0	0	0	0	0	0	0	508709	0	7.23608e+06	0	230109	0	77312.5	0	0	625562	347944	0	0	0	0	0	0	633153	84848.6	0	745865
Phe-Tyr	Peptide	Dipeptide	HMDB0029007	Meta_210	3.987	329.149	[M+H]+	Positive	617976	2.36124e+06	2.27433e+06	905968	4.17353e+06	1.2595e+07	2.94555e+07	3.00017e+06	1.08011e+06	9.73721e+06	506349	1.89732e+07	533366	1.28721e+07	2.53177e+07	7.16119e+06	1.02988e+06	2.92988e+06	575881	683207	2.46161e+06	4.28319e+06	3.96761e+06	4.38387e+06	4.31987e+06	667139	1.01642e+06	0	4.70416e+06	878904	1.05515e+06	2.20078e+06	824148	3.03201e+06	3.0568e+06	2.00236e+07	5.97731e+06	4.15741e+06	1.26065e+06	5.40461e+06	1.61111e+07
Indoleacetic Acid	Amino Acid	Tryptophan Metabolism	HMDB0000197	Meta_86	5.513	176.07	[M+H]+	Positive	6.84	1.3077e+06	2.2498e+06	2.45577e+06	1.08748e+06	3.07323e+06	541094	480586	1.09512e+06	1.40862e+06	2.3246e+06	9.6554e+06	535558	2.20779e+06	2.0212e+06	2.22398e+06	2.17234e+06	1.23908e+06	1.37044e+06	3.26019e+06	5.79735e+06	2.5675e+06	4.2143e+06	2.49511e+06	304740	967849	580802	475584	2.59809e+06	542194	1.01243e+06	2.66749e+06	310975	680746	3.44386e+06	4.88832e+06	4.87278e+06	6.18675e+06	387742	185270	6.90988e+06
Gamma-Glutamylleucine	Peptide	Gamma-glutamyl Amino Acid	HMDB0011171	Meta_171	3.618	261.144	[M+H]+	Positive	7.06	4.44258e+06	2.21094e+06	1.7975e+06	4.47734e+06	5.10435e+06	4.15648e+06	1.94223e+06	1.32867e+06	596801	1.8349e+06	2.27783e+06	3.737e+06	3.55341e+06	1.85363e+06	1.88432e+06	1.15848e+06	2.79008e+06	692652	1.45372e+06	2.69182e+06	1.73843e+06	2.61019e+06	3.27049e+06	635031	452080	204218	195209	3.80975e+06	1.04012e+06	1.44424e+06	1.24529e+06	294020	1.10061e+06	1.31339e+06	7.9718e+06	7.39634e+06	622263	460786	1.99618e+06	715035
7-Methylguanine	Nucleotide	Purine Metabolism, Guanine containing	HMDB0000897	Meta_274	0.9	165.04	[M-H]-	Negative_NH4HCO3	35.73	2.1975e+06	2.20277e+06	2.82932e+06	4.31294e+06	3.2469e+06	4.79185e+06	1.54067e+06	2.00992e+07	2.36845e+06	3.21267e+06	1.29456e+06	1.16008e+07	15977814	2.09672e+06	1.40021e+06	2.61733e+06	1.89842e+06	2.98196e+06	2.86686e+06	2.86249e+06	4.19702e+06	1.9254e+06	4.69602e+06	767397	1.28951e+07	1.09777e+06	734266	4.3422e+06	892965	1.25019e+06	3.28286e+06	921303	2.29581e+06	4.19764e+06	4.83411e+06	4.46557e+06	1.35164e+06	950489	2.15265e+06	849318
N-Acetylproline	Amino Acid	Urea cycle; Arginine and Proline Metabolism	HMDB0094701	Meta_68	1.007	158.081	[M+H]+	Positive	8.55	1.57846e+06	2.1645e+06	1.0019e+06	2.36172e+06	1.8867e+06	3.18472e+06	1.08547e+06	3.08057e+06	2.18446e+06	2.77465e+06	1.7378e+06	2.15775e+06	1.19877e+06	2.27944e+06	1.30464e+06	2.53553e+06	2.21815e+06	1.93366e+06	2.50905e+06	1.2509e+06	1.69214e+06	1.9726e+06	2.71997e+06	2.45009e+06	1.86578e+06	1.11774e+06	2.08779e+06	2.26079e+06	2.03598e+06	1.60928e+06	2.72802e+06	1.14423e+06	2.54064e+06	3.49416e+06	3.29272e+06	3.74732e+06	3.13804e+06	2.04308e+06	5.98783e+06	3.37687e+06
Glutarylglycine	Lipid	Fatty Acid Metabolism (Acyl glycines)	HMDB0000590	Meta_413	1.246	188.056	[M-H]-	Negative_FA	19.11	2.92463e+06	2.15251e+06	3.0568e+06	3.70243e+06	4.36822e+06	2.10563e+06	1.49516e+06	5.45151e+06	1.14476e+06	2.92636e+06	3.91754e+06	1.70007e+06	2.47861e+06	2.22397e+06	2.37933e+06	2.60823e+06	3.66742e+06	692663	3.81316e+06	1.05834e+06	3.58839e+06	2.53112e+06	1.18039e+06	749522	1.53479e+06	584636	224495	1.82702e+06	692970	777454	1.6152e+06	577712	864892	1.6555e+06	3.67897e+06	3.8151e+06	2.51302e+06	391620	1.63299e+06	2.97161e+06
L-Tyrosine-D4(Neg_FA)	Unclassified	Unclassified		Meta_411	1.25	184.091	[M-H]-	Negative_FA	32.7	2.5541e+06	2.10843e+06	1.44417e+06	1.5622e+06	1.49599e+06	928740	2.50977e+06	739967	1.96978e+06	1.62661e+06	1.9391e+06	657232	1.22438e+06	2.57145e+06	2.43847e+06	1.73898e+06	2.13832e+06	1.73897e+06	1.58156e+06	1.9942e+06	1.99614e+06	1.87507e+06	2.40794e+06	2.17425e+06	343207	2.52241e+06	2.48492e+06	2.29213e+06	2.30913e+06	2.25861e+06	1.91901e+06	2.18737e+06	1.60147e+06	1.59814e+06	1.80021e+06	1.69687e+06	1.50531e+06	2.49684e+06	2.17512e+06	1.42691e+06
Glycolic Acid	Carbohydrate	Glyoxylate and dicarboxylate metabolism	HMDB0000115	Meta_230	0.925	74.9611	[M-H]-	Negative_NH4HCO3	6.11	1.72552e+06	2.10499e+06	3.83868e+06	2.20362e+06	1.80518e+06	1.20206e+06	2.13003e+06	525712	734416	4.23663e+06	1.14416e+06	1.66017e+06	1.64345e+06	1.30557e+06	1.52668e+06	3.08094e+06	2.65985e+06	1.71852e+06	3.42816e+06	1.16626e+06	3.56078e+06	1849402	958950	1.43684e+06	715897	836462	844413	1.26259e+06	1.14695e+06	1.57527e+06	905254	1.30021e+06	1.30622e+06	701955	1.4194e+06	1.45109e+06	1.84973e+06	838944	1.92352e+06	1.95399e+06
Glutarate (C5-DC)	Lipid	Fatty Acid, Dicarboxylate	HMDB0000661	Meta_390	1.725	131.034	[M-H]-	Negative_FA	18.14	3.0399e+06	2.10344e+06	6.74594e+06	4.9624e+06	5.26569e+06	3.42003e+06	2.30875e+06	6.05431e+06	2.97934e+06	6.01747e+06	6.42339e+06	2.76841e+06	3.87202e+06	3.35587e+06	3.63427e+06	4.99581e+06	1.88437e+06	2.48053e+06	6.29425e+06	2.94119e+06	4.65086e+06	5.03708e+06	3.18298e+06	6.83603e+06	1.68079e+06	2.90874e+06	1.08746e+06	2.65229e+06	1.93122e+06	2.28714e+06	3.61064e+06	2.1824e+06	2.33735e+06	4.11906e+06	3.87992e+06	4.25253e+06	5.106e+06	4.6768e+06	3.19195e+06	6.46429e+06
Heptadecanoic Acid (C17:0)	Lipid	Long Chain Fatty Acid	HMDB0002259	Meta_338	8.166	269.249	[M-H]-	Negative_NH4HCO3	103.93	1.97917e+06	2.05808e+06	2.2263e+06	2.50423e+06	2.15686e+06	1.89981e+06	1.93506e+06	1.55425e+06	1.41013e+06	2.36298e+06	1.30026e+06	1.97467e+06	1.79193e+06	2.43212e+06	1.8024e+06	2.89588e+06	1.75856e+06	1.90023e+06	3.01647e+06	1.98931e+06	3.23168e+06	1.62156e+06	2.11011e+06	1.74987e+06	2.16888e+06	2.226e+06	1.92469e+06	2.17492e+06	1.71549e+06	1.97041e+06	1.67266e+06	2.26194e+06	1.6639e+06	2.16219e+06	1.95414e+06	1.688e+06	1.59412e+06	1.81413e+06	1.69882e+06	1.32369e+06
Cyclo(Leu-Pro)	Peptide	Dipeptide	HMDB0034276	Meta_119	4.706	211.144	[M+H]+	Positive	11.19	1.636e+06	2.03069e+06	2.30894e+06	4.892e+06	3.85372e+06	2.58635e+06	2.73074e+06	307665	803004	2.42601e+06	1.00452e+06	1.60833e+06	2.73383e+06	933883	1.07564e+06	1.47998e+06	3.37744e+06	1.72025e+06	1.94758e+06	1.55351e+06	3.0747e+06	1.6882e+06	582994	2.56829e+06	448325	2.02494e+06	559164	655720	6.00992e+06	8.4719e+06	2.30933e+06	1.62082e+06	392301	2.51884e+06	1.67632e+06	1.70289e+06	2.12008e+06	1.01442e+06	907561	2.50824e+06
Ile-Leu	Peptide	Dipeptide	HMDB0028911	Meta_149	4.497	245.186	[M+H]+	Positive	10.02	1.61301e+06	2.01345e+06	874494	3.65959e+06	4.40145e+06	1.75901e+06	222200	0	638046	720879	1.02463e+07	11741.2	609337	4.50571e+06	3.46015e+06	884028	2.23892e+06	0	913745	413559	6.39138e+06	1.04431e+07	1.50511e+06	540308	0	315863	0	1.57428e+06	213199	310395	141868	7884.45	577417	375259	4.2448e+06	2.75843e+06	1.7106e+06	126282	2.74609e+06	1.66068e+06
Ser-Val	Peptide	Dipeptide	HMDB0029052	Meta_117	1.385	205.118	[M+H]+	Positive	13.47	1.71933e+06	2.00453e+06	2.91342e+06	6.9409e+06	6.65346e+06	1.41753e+06	892186	120599	931192	2.54734e+06	5.44476e+06	509788	1.46782e+06	3.3282e+06	3.0309e+06	1.21492e+06	2.25338e+06	520291	1.48804e+06	587218	4.46799e+06	8.72042e+06	2.13965e+06	385785	732358	978251	0	2.25302e+06	1.44334e+06	1.82205e+06	1.47585e+06	838605	1.7842e+06	1.74522e+06	4.56941e+06	4.75087e+06	1.04084e+06	76987	3.58411e+06	936556
Hordenine	Xenobiotics	Natural Product/Food/Plant	HMDB0004366	Meta_78	2.143	166.125	[M+H]+	Positive	60405.6	3.35274e+06	1.99221e+06	7.70666e+06	8.78122e+06	6.66373e+06	5.47809e+06	2.11508e+06	1.94734e+06	2.10267e+06	1.06603e+07	5.11524e+06	2.05855e+06	5.08038e+06	3.82722e+06	5.02071e+06	5.92044e+06	2.71987e+06	1.69123e+06	7.96868e+06	2737082	6.98433e+06	4.32929e+06	3.73986e+06	2.64711e+06	1.12378e+06	2.68525e+06	226219	4.46885e+06	1.36598e+06	2.0994e+06	2.36851e+06	2.39277e+06	1.57539e+06	2.39254e+06	8.88274e+06	9.07111e+06	2.86845e+06	1.29153e+06	3.27603e+06	3.12176e+06
Guanidinosuccinic Acid	Amino Acid	Urea cycle; Arginine and Proline Metabolism	HMDB0003157	Meta_85	1.577	176.066	[M+H]+	Positive	8.54	1.68415e+06	1.98785e+06	7.44226e+06	2.40914e+06	2.81952e+06	3.3873e+06	1.40455e+06	1.31557e+06	1.42022e+06	7.8133e+06	3.83773e+06	1.04665e+06	1.88906e+06	2.56062e+06	3.63513e+06	4.28965e+06	2.12196e+06	1.50518e+06	4.82021e+06	1.77138e+06	6.32928e+06	2.62526e+06	2.8532e+06	990081	1.46677e+06	1.19453e+06	447345	3.23325e+06	1.56243e+06	1.6093e+06	1.63458e+06	799741	1.54389e+06	1.59069e+06	4.19714e+06	4.34498e+06	1.49427e+06	716411	2.9133e+06	941890
D-Ribose 5-Phosphate	Carbohydrate	Pentose phosphate pathway	HMDB0001548	Meta_322	0.85	229.011	[M-H]-	Negative_NH4HCO3	36.12	2.47744e+06	1.97201e+06	969183	3.657e+06	2.39171e+06	2.62385e+06	1.28185e+06	1.09661e+06	1.44874e+06	1.08723e+06	1.20121e+06	1.63169e+06	3.07963e+06	4.99016e+06	3.41279e+06	297445	2.34655e+06	1.22415e+06	762644	892480	1.3964e+06	759158	2.2337e+06	1.6654e+06	2.07705e+06	1.63345e+06	87587.7	2.10839e+06	2.04094e+06	3.19227e+06	2.66466e+06	1.4512e+06	2.88791e+06	3.39328e+06	4.85249e+06	4.95667e+06	665221	971458	1.12669e+07	987470
3-Hydroxyisovaleric Acid	Amino Acid	Leucine, Isoleucine and Valine Metabolism	HMDB0000754	Meta_383	2.021	117.055	[M-H]-	Negative_FA	9.86	1.98472e+06	1.96706e+06	2.78906e+06	4.13713e+06	2.28209e+06	4.31823e+06	1.49465e+06	1.69932e+06	2.65186e+06	2.61203e+06	3.05222e+06	2.65588e+06	3.19627e+06	1.92544e+06	2.18304e+06	3.39002e+06	2.52746e+06	4.01747e+06	3.59889e+06	1.58298e+06	3.17856e+06	2.60558e+06	1.92404e+06	2.657e+06	1.99352e+06	2.67906e+06	1.59359e+06	1.89247e+06	2.19523e+06	1.65816e+06	2.2993e+06	2.1306e+06	2.5643e+06	1.81204e+06	2.9772e+06	2.99733e+06	3.43294e+06	1.70301e+06	2.94236e+06	4.59899e+06
PHENETHYLAMINE	Unclassified	Unclassified		Meta_145	3.067	243.182	[M+H]+	Positive	8.16	1.73003e+06	1.94899e+06	1.12008e+06	1.97825e+06	926265	1.24954e+06	1.702e+06	1.76762e+06	2.06171e+06	1.2363e+06	1.16305e+06	1.1601e+06	1.10831e+06	1.41947e+06	1.17902e+06	2.80286e+06	1.51336e+06	2.0503e+06	3.10208e+06	1.74712e+06	1.13813e+06	1.12171e+06	1.57139e+06	1.28836e+06	401956	1.06861e+06	1.37898e+06	1.55132e+06	1.26513e+06	1.22861e+06	1.63549e+06	1.20155e+06	1.91834e+06	1.54396e+06	1.65727e+06	2.05119e+06	1.19816e+06	1.24885e+06	1.67873e+06	1.21356e+06
3-Formylindole	Xenobiotics	Natural Product/Food/Plant	HMDB0029737	Meta_53	3.231	146.06	[M+H]+	Positive	9.77	1.79558e+06	1.94477e+06	5.40398e+06	2.29988e+06	4.81035e+06	4.93035e+06	1.6995e+06	2.74233e+06	2.69886e+06	5.60442e+06	4.53212e+06	807991	4.19025e+06	2.62787e+06	4.05091e+06	3.03764e+06	1.83111e+06	2.69139e+06	3.90685e+06	2.63266e+06	1.08487e+07	2.02156e+06	3.38158e+06	1.55842e+06	1.40202e+06	778800	566624	3.93398e+06	1.16585e+06	908107	1.46811e+06	519458	1.03808e+06	1.25957e+06	7.72612e+06	8.43608e+06	2.5547e+06	1.14295e+06	1.24131e+06	2.05773e+06
Dodecanedioate (C12-DC)	Lipid	Fatty Acid, Dicarboxylate	HMDB0000623	Meta_423	6.219	229.145	[M-H]-	Negative_FA	43.63	1.86526e+06	1.92473e+06	1.81249e+06	2.88743e+06	2.86757e+06	2.3073e+06	1.88891e+06	2.93779e+06	1.92926e+06	1.98395e+06	2.34532e+06	1.90703e+06	2.51838e+06	1.63621e+06	1.90229e+06	2.68288e+06	2.58653e+06	2.25259e+06	2.79853e+06	2.02505e+06	2.97312e+06	2.55415e+06	2.02872e+06	1.96032e+06	10423947	1.48347e+06	1.65891e+06	2.38212e+06	1.81534e+06	1.48039e+06	2.18924e+06	1.55484e+06	1.99133e+06	1.9066e+06	2.84685e+06	2.79067e+06	3.7308e+06	1.72098e+06	2.18952e+06	4.70519e+06
1,3-Dimethylurate	Xenobiotics	Xanthine Metabolism	HMDB0001857	Meta_414	0.955	195.051	[M-H]-	Negative_FA	83.16	2.24137e+06	1.87254e+06	2.28236e+06	2.25562e+06	4.10212e+06	6.29002e+06	2.30424e+06	142108856	2.11411e+06	2.02847e+06	3.71368e+06	1.43528e+07	4.00723e+06	1.65631e+06	1.78121e+06	2.67806e+06	2.0641e+06	2.64747e+06	3.45283e+06	2.83406e+06	2.49985e+06	4.49973e+06	4.54511e+06	571796	9.21408e+06	1.07769e+06	1.48736e+06	4.98258e+06	6.83733e+06	7.71994e+06	3.49858e+06	874195	8.74284e+06	4.09736e+06	8.19121e+06	9.11501e+06	4.99812e+06	530776	4.89232e+07	5.58136e+06
3-Hydroxyanthranilic Acid	Amino Acid	Tryptophan Metabolism	HMDB0001476	Meta_67	1.267	154.05	[M+H]+	Positive	10	1.48531e+06	1.81185e+06	3.52741e+06	3.6813e+06	2.10816e+06	2.84096e+06	567023	998583	1.89243e+06	3.50861e+06	2.76443e+06	1.47331e+06	2.0486e+06	1.29467e+06	1.43667e+06	2.96451e+06	3.74786e+06	2.01636e+06	4.42394e+06	1.28529e+06	5.37836e+06	2.93869e+06	2.06909e+06	1.19424e+06	1.20159e+06	745524	682548	2.30939e+06	1.36612e+06	1.6576e+06	1.35221e+06	1.01717e+06	1.4748e+06	1.34764e+06	4.25948e+06	4.71987e+06	4.20328e+06	851750	819416	4.72766e+06
Val-Leu	Peptide	Dipeptide	HMDB0029131	Meta_136	3.738	231.17	[M+H]+	Positive	7.69	1.51206e+06	1.79536e+06	716746	3.46247e+06	5.91351e+06	2.22894e+06	292017	37110.6	841658	760386	9.95862e+06	296459	969145	4.64113e+06	3.47663e+06	999245	2.04242e+06	33433.4	1.07122e+06	618202	6.19339e+06	8.20289e+06	1.38796e+06	664360	42096.3	401613	0	1.76813e+06	294348	310791	368016	202489	789186	506133	4.19441e+06	2.98828e+06	2.32158e+06	137409	2.85236e+06	2.36462e+06
Alpha-Ketobutyrate	Amino Acid	Methionine, Cysteine, SAM and Taurine Metabolism	HMDB0000005	Meta_237	0.971	101.024	[M-H]-	Negative_NH4HCO3	42.52	626929	1.74318e+06	398543	515377	862454	1.4887e+06	545751	4.49037e+07	384146	453303	563534	4.94222e+06	762324	843515	864528	772677	314599	1.25356e+06	789532	780518	999699	359528	600924	411741	1.59959e+07	457453	238837	663759	649599	731751	2.06677e+06	1.0949e+06	1.29557e+06	1.53801e+06	565726	649075	759532	397049	391266	876636
Tyramine O-Sulfate	Amino Acid	Tyrosine Metabolism	HMDB0006409	Meta_421	0.942	216.036	[M+Cl]-	Negative_FA	39.48	1.47564e+06	1.72477e+06	944116	485047	2.50398e+06	3.71992e+06	780781	6.21211e+07	813220	1.33791e+06	2.32517e+06	3.03529e+07	2.35154e+06	2.02204e+06	1.84971e+06	1.24509e+06	1.34166e+06	1.71412e+06	1.49555e+06	1.7835e+06	1.78509e+06	2.22759e+06	978878	79089.9	2.68481e+07	556325	158654	958133	885761	1.19651e+06	4.71033e+06	631823	5.233e+06	4.74772e+06	1.98865e+06	2.38924e+06	2.2619e+06	253814	1.44122e+06	2.55779e+06
D-Gluconic Acid	Carbohydrate	Pentose phosphate pathway	HMDB0000625	Meta_300	0.9	195.051	[M-H]-	Negative_NH4HCO3	560.3	2.15375e+06	1.71952e+06	2.03928e+06	2.70237e+06	2.59127e+06	5.92387e+06	1.61441e+06	9.50375e+07	1.93176e+06	2.54098e+06	1.82417e+06	1.08334e+07	2.62776e+06	2.60361e+06	1.90706e+06	2.13588e+06	1.03959e+06	3.14814e+06	2.1686e+06	2.49834e+06	2.68145e+06	2.73069e+06	4.54684e+06	361625	3.91672e+06	635314	1.14602e+06	4.23845e+06	4.72675e+06	8.02627e+06	2.32319e+06	514019	8.14914e+06	3.19968e+06	4.47107e+06	4.12293e+06	2.34058e+06	478661	4.60354e+07	1.24963e+06
Phenylacetic Acid	Amino Acid	Phenylalanine Metabolism	HMDB0000209	Meta_394	3.04	135.045	[M-H]-	Negative_FA	7.52	2.7404e+06	1.71539e+06	5.64851e+06	2.38889e+06	4.46334e+06	4.52441e+06	1.97758e+06	2.50631e+06	2.17377e+06	5.18977e+06	3.14588e+06	3.65715e+06	3.28111e+06	2.46374e+06	2.81559e+06	3.35901e+06	3.28954e+06	2.283e+06	3.53582e+06	2.52041e+06	4.00775e+06	3.95731e+06	2.3829e+06	2.74421e+06	3.0031e+06	2.224e+06	1.50326e+06	2.59645e+06	2.35159e+06	1.98173e+06	2.41798e+06	1.98094e+06	2.67492e+06	2.57179e+06	4.14449e+06	3.50193e+06	5.87765e+06	1.87605e+06	3.3492e+06	7.10592e+06
N-Alpha-Acetylornithine	Amino Acid	Urea cycle; Arginine and Proline Metabolism	HMDB0003357	Meta_83	0.978	175.108	[M+H]+	Positive	22.22	3.64267e+06	1.69146e+06	6.92427e+06	1.41347e+06	5.1238e+06	6.08343e+06	1.28616e+06	9.3969e+06	2.86444e+06	5.86213e+06	5.81044e+06	3.05162e+06	2.87766e+06	3.82559e+06	4.45116e+06	3.87007e+06	1.80305e+06	2.72079e+06	4.05587e+06	1.96132e+06	4.07255e+06	7.41543e+06	2.15527e+06	643007	5.36304e+06	628448	403323	2.70569e+06	654341	634728	1.8172e+06	534569	2.23706e+06	1.86822e+06	4.1326e+06	4.44041e+06	7.54047e+06	277218	2.37217e+06	1.01618e+07
Trans-Cinnamaldehyde	Xenobiotics	Natural Product/Food/Plant	HMDB0003441	Meta_43	6.427	133.065	[M+H]+	Positive	6.02	1.40987e+06	1.67603e+06	1.61518e+06	2.03358e+06	2.2618e+06	1.7759e+06	899157	2.1035e+06	1.88786e+06	828793	1.89348e+06	1.42693e+06	1.85512e+06	1.12848e+06	1.87564e+06	1.50447e+06	2.2902e+06	1.29615e+06	1.56489e+06	1.43944e+06	867703	1.99786e+06	1.11433e+07	1.23605e+06	164363	1.30913e+06	1.28813e+06	588715	3.85692e+06	1.26773e+06	1.41091e+06	975485	1.23178e+06	1.80444e+06	1.88676e+06	1.61447e+06	1.42008e+06	1.08926e+06	1.2941e+06	1.95065e+06
3-Hydroxyhexanoate	Lipid	Fatty Acid, Monohydroxy	HMDB0061652	Meta_391	4.173	131.071	[M-H]-	Negative_FA	9.62	1.34923e+06	1.6499e+06	2.95254e+06	1810469	2.00674e+06	2.41175e+06	1.43344e+06	1.87182e+06	1.56686e+06	2.69217e+06	2.33021e+06	1.96014e+06	2.89194e+06	1.33156e+06	1.98441e+06	1.89023e+06	1.80996e+06	2.71528e+06	2.38868e+06	1.589e+06	2.57336e+06	2.12066e+06	1.78595e+06	1.62894e+06	3.76173e+06	2.46379e+06	1.07271e+06	1.879e+06	1.07739e+06	1.29626e+06	1.53673e+06	2.48393e+06	1.19774e+06	1.33024e+06	3.24769e+06	3.82248e+06	2.48671e+06	1.07203e+06	1.90326e+06	3.01591e+06
Pantothenate	Cofactors and Vitamins	Pantothenate and CoA Metabolism	HMDB0000210	Meta_127	2.203	220.118	[M+H]+	Positive	14.22	1.48438e+06	1.64504e+06	2.39164e+06	4.83128e+06	818180	3.58857e+06	534573	3.59013e+06	779802	2.68104e+06	2.06288e+06	311949	1.64292e+06	3.73807e+06	3.83065e+06	3.10461e+06	739095	1.04744e+06	3.82198e+06	665445	2.08786e+06	628478	832634	784463	206479	674350	319402	777404	279000	477094	545426	557748	105619	550440	2.07285e+06	1.99074e+06	178120	423860	425698	839918
Pimelate (C7-DC)	Lipid	Fatty Acid, Dicarboxylate	HMDB0000857	Meta_398	4.077	159.066	[M-H]-	Negative_FA	6.99	1.67735e+06	1.64043e+06	1.2013e+06	3.61231e+06	1.83942e+06	1.60899e+06	1.60807e+06	1.49433e+06	1.35218e+06	1.17931e+06	1.57557e+06	1.61311e+06	2.34969e+06	982297	1.28591e+06	1.75314e+06	1.56771e+06	1.81987e+06	2.49231e+06	1.34224e+06	973571	979318	1.04306e+06	1.00671e+06	807550	822297	1.25527e+06	1.47525e+06	1.09111e+06	1.37612e+06	1.42338e+06	1.07801e+06	1.37646e+06	1.6801e+06	1.33273e+06	1.36525e+06	1.59607e+06	839061	1.15864e+06	1.98719e+06
Ile-Asn	Peptide	Dipeptide	HMDB0028902	Meta_150	2.762	246.144	[M+H]+	Positive	6.6	943143	1.64027e+06	1.70956e+06	3.15746e+06	1.814e+06	1.89126e+06	592349	92873.2	1.03321e+06	1.4098e+06	3.09159e+06	211075	681315	1.67585e+06	1.49411e+06	734625	1.72685e+06	221226	791195	360353	1.46894e+06	2.5372e+06	1.2936e+06	392869	116162	866975	0	1.7525e+06	393358	625692	344764	644156	959943	571485	3.2294e+06	2.747e+06	1.13992e+06	92283.1	1.16144e+06	1.34229e+06
2-Hydroxycaproic Acid	Lipid	Fatty Acid, Monohydroxy	HMDB0001624	Meta_253	2.047	131.071	[M-H]-	Negative_NH4HCO3	49.75	1.62611e+06	1.60286e+06	2.93506e+07	1.87651e+06	5.80509e+06	8.63102e+06	421851	2.15024e+06	1.49223e+06	3.17295e+07	7.25388e+06	2.00837e+06	1.78787e+06	5.67763e+06	5.3414e+06	8.29598e+06	820825	2.33493e+06	1.31733e+07	1.76991e+06	9.32774e+06	3.11217e+06	2.38483e+06	785868	1.81624e+07	706853	41191.1	2.16226e+06	563043	972567	892700	521908	664566	1.13721e+06	5.9057e+06	5.93568e+06	4.28567e+06	362405	4.28653e+06	6.4711e+06
N-Acetylasparagine	Amino Acid	Alanine, Aspartate and Glutamate Metabolism	HMDB0006028	Meta_403	0.976	173.057	[M-H]-	Negative_FA	9.52	3.09472e+06	1.58192e+06	7.92816e+06	1.79699e+06	4.54013e+06	1.51405e+06	1.10289e+06	2.16977e+06	1.79185e+06	7.89461e+06	5.26671e+06	1.54418e+06	1.49308e+06	4.045e+06	4.30296e+06	2.06752e+06	2.14395e+06	976598	1.72194e+06	1.91058e+06	3.25649e+06	4.43025e+06	2.86854e+06	618140	1.36379e+06	1.24363e+06	2.03864e+06	3.03021e+06	2.73737e+06	2.50665e+06	2.00277e+06	1.31879e+06	1.38798e+06	2.08235e+06	4.15636e+06	4.21272e+06	1.93492e+06	1.22832e+06	2.86474e+06	2.27429e+06
4-Guanidinobutanoate	Amino Acid	Urea cycle; Arginine and Proline Metabolism	HMDB0003464	Meta_54	1.051	146.092	[M+H]+	Positive	10.96	1.11138e+06	1.57433e+06	1.84088e+06	4.63532e+06	1.38399e+06	1.85015e+06	667409	8.50849e+06	859823	1.97502e+06	338049	974067	981419	306408	200470	1.39518e+06	305851	717562	1.4834e+06	893368	1.00732e+06	1.27522e+06	570751	415720	472515	72059.8	444433	524559	430553	502554	683131	52704.9	413326	646505	703999	714928	1.08431e+06	158414	222595	1.19274e+06
N-Acetylglutamate	Amino Acid	Alanine, Aspartate and Glutamate Metabolism	HMDB0001138	Meta_101	1.243	190.071	[M+H]+	Positive	5.65	1.71198e+06	1.56956e+06	1.5492e+06	1.35418e+06	2.33817e+06	1.66646e+06	1.04582e+06	3.62501e+06	854093	1.75634e+06	1.90279e+06	2.16195e+06	1.42756e+06	1.20278e+06	1.44141e+06	1.43164e+06	1.60182e+06	1.33317e+06	1.74988e+06	1.15636e+06	1.996e+06	1.19548e+06	1.41035e+06	932315	1.29055e+06	1.0077e+06	541188	1.01935e+06	616217	1.0168e+06	1.97868e+06	531344	1.18064e+06	1.92707e+06	1.51184e+06	1.56322e+06	1.82418e+06	730653	1.82195e+06	1.69664e+06
Sarcosine	Amino Acid	Glycine, Serine and Threonine Metabolism	HMDB0000271	Meta_232	0.958	88.0395	[M-H]-	Negative_NH4HCO3	34.24	1.9237e+06	1.53899e+06	6.10107e+06	3.73136e+06	4.02281e+06	3.76711e+06	1.11963e+06	3.18251e+06	1.50796e+06	6.55047e+06	2.68503e+06	4.47881e+06	2.38995e+06	2.54331e+06	2.21493e+06	3.44074e+06	1.68508e+06	2.1846e+06	4.21503e+06	2.19784e+06	3.87235e+06	3.18305e+06	2.9709e+06	1.19353e+06	3.441e+06	1.18466e+06	795673	2.81527e+06	1.36406e+06	1.77695e+06	1.75774e+06	1.28013e+06	1.55448e+06	1.80468e+06	3.80249e+06	4.46383e+06	3.39133e+06	551936	2.28458e+06	3.46755e+06
Ser-Leu	Peptide	Dipeptide	HMDB0029043	Meta_126	2.725	219.134	[M+H]+	Positive	25.29	1.6888e+06	1.48933e+06	3.22071e+06	4.11973e+06	8.97055e+06	3.61635e+06	947406	233015	1.02457e+06	3.20496e+06	1.31269e+07	2.17191e+06	4.48798e+06	5.62786e+06	4.50236e+06	1.38271e+06	3.4535e+06	339529	1.3652e+06	992333	6.17959e+06	1.10613e+07	1.83057e+06	1.68494e+06	4.36084e+06	1.01955e+06	0	1.8073e+06	1.22096e+06	1.80056e+06	4.22113e+06	722670	2.77427e+06	5.52766e+06	4.24706e+06	3.69476e+06	4.75126e+06	679852	8.1045e+06	5.64256e+06
Deoxycytidine	Nucleotide	Pyrimidine Metabolism, Cytidine containing	HMDB0000014	Meta_133	1.058	228.106	[M+H]+	Positive	6.22	1.8254e+06	1.48917e+06	2.50509e+06	1.77481e+06	2.26363e+06	1.85276e+06	116185	2.44958e+06	1.13653e+06	2.46381e+06	3.06651e+06	620473	750685	3.77081e+06	3.73779e+06	1.67845e+06	1.83811e+06	551648	2.01529e+06	1.48028e+06	1.07455e+06	1.08194e+06	3.11251e+06	1.91938e+06	839428	263540	0	3.2681e+06	504559	1.00262e+06	751525	294791	55733.3	1.10139e+06	6.51583e+06	7.26932e+06	801479	809339	1.8302e+06	1.15105e+06
N6-Acetyllysine	Amino Acid	Lysine Metabolism	HMDB0000206	Meta_99	1.02	189.124	[M+H]+	Positive	59648.1	2.15258e+06	1.47818e+06	5.13043e+06	2.76433e+06	3.88949e+06	4.03762e+06	974443	3.24833e+06	1.35674e+06	4.78014e+06	5.04366e+06	1.80682e+06	2.85064e+06	2.18459e+06	2.6788e+06	3.61152e+06	1.45521e+06	1.10923e+06	5.24516e+06	1.29733e+06	5.4805e+06	3.32213e+06	1.35211e+06	1.00245e+06	1.88147e+06	1.05877e+06	0	1.81761e+06	610451	831069	922390	1.10985e+06	769806	1.60478e+06	3.59653e+06	2.70481e+06	3.10672e+06	468193	3.34769e+06	3.61052e+06
Thr-Leu	Peptide	Dipeptide	HMDB0029065	Meta_141	2.945	233.15	[M+H]+	Positive	5.96	864429	1.42892e+06	582650	2.3657e+06	3.61994e+06	1.31031e+06	269649	312405	463271	484840	4.23169e+06	92704.9	654056	1.76887e+06	1.24453e+06	797333	1.06595e+06	86558	615647	347343	2.58425e+06	3.54618e+06	1.12601e+06	333057	73399.7	588168	243898	1.36567e+06	174642	265424	951672	333883	950702	984224	2.89849e+06	2.60006e+06	1.08854e+06	106223	2.16233e+06	1.21421e+06
Glycerate	Carbohydrate	Glyoxylate and dicarboxylate metabolism	HMDB0000139	Meta_241	0.899	105.018	[M-H]-	Negative_NH4HCO3	13.39	2.20158e+06	1.42833e+06	2.09827e+06	1.46907e+06	1.46231e+06	1.28501e+06	707609	1.13578e+06	1.02199e+06	2.65888e+06	2.4307e+06	1.34543e+06	945609	3.7929e+06	4.77658e+06	1.29882e+06	798353	793859	1.34961e+06	889436	1.79362e+06	1.10262e+06	1.19039e+06	310125	1.08171e+06	479684	352267	1.1518e+06	850979	977113	949926	609263	602350	943431	1.67992e+06	1.87851e+06	454891	314494	1.1715e+06	330025
Gly-Phe	Peptide	Dipeptide	HMDB0028848	Meta_130	3.397	223.107	[M+H]+	Positive	23.27	2.08564e+06	1.42537e+06	3.3221e+06	4.37545e+06	3.15655e+06	1.90039e+06	1.22976e+06	3.11708e+06	1.71707e+06	2.49437e+06	3.53225e+07	644787	1.26473e+06	1.50589e+07	1.64302e+07	2.29056e+06	3.05273e+06	735188	2.80047e+06	2.10095e+06	1.46729e+07	3.59708e+06	2.64437e+06	1.29481e+06	852934	386157	252972	2.73539e+06	1.31388e+06	1.42698e+06	1.83577e+06	599330	1.88001e+06	2.43393e+06	5.27335e+06	5.22098e+06	4.01853e+06	857849	3.27968e+06	3.99711e+06
N6,N6,N6-Trimethyllysine	Amino Acid	Lysine Metabolism	HMDB0001325	Meta_100	0.893	189.16	[M+H]+	Positive	12432.9	1.99485e+06	1.41846e+06	2.27937e+06	1.8924e+06	2.07319e+06	1.69046e+06	647795	1.76553e+06	959621	2.31401e+06	2.65318e+06	1.5475e+06	1.66101e+06	1.02837e+06	1.50856e+06	2.32921e+06	1.04357e+06	913693	3.1572e+06	934194	3.20133e+06	2.74619e+06	1.06613e+06	886219	3.37379e+06	617280	79157	1.2822e+06	624709	523533	936480	341196	886138	1.02119e+06	1.96698e+06	1.9999e+06	2.0667e+06	586875	1.29284e+06	2.81901e+06
Quinolinate	Cofactors and Vitamins	Nicotinate and Nicotinamide Metabolism	HMDB0000232	Meta_275	0.952	166.017	[M-H]-	Negative_NH4HCO3	39.39	1.09566e+06	1.38165e+06	1.39026e+06	5.7794e+06	624057	3.34397e+06	1.27119e+06	345568	3.0285e+06	1.80665e+06	2.6908e+06	2.68175e+06	2.97848e+06	705362	507722	2.11205e+06	2.21561e+06	1.20076e+06	3.78806e+06	1.77781e+06	1.55301e+06	653238	1.01043e+06	2.04339e+06	1.88464e+06	2.28648e+06	2.37973e+06	629692	2.19241e+06	1.19873e+06	2.00729e+06	3.24572e+06	1.22961e+06	1.79417e+06	888349	1.37833e+06	1.76145e+06	1.96061e+06	2.33652e+06	1.9471e+06
Ala-Leu	Peptide	Dipeptide	HMDB0028691	Meta_110	2.936	203.139	[M+H]+	Positive	12.59	1.17143e+06	1.38146e+06	874615	3.6377e+06	4.344e+06	1.44105e+06	265311	136497	559549	757261	4.51671e+06	179920	884648	2.82587e+06	2.50007e+06	993619	1.56867e+06	38967.2	1.18226e+06	417855	2.74203e+06	4.96345e+06	2.00677e+06	502742	30879.9	199998	0	1.96939e+06	279853	276041	788309	151347	1.43771e+06	1.08865e+06	4.74037e+06	3.78905e+06	1.74867e+06	113859	3.88766e+06	1.72761e+06
Alliin	Xenobiotics	Natural Product/Food/Plant	HMDB0033592	Meta_88	0.893	178.059	[M+H]+	Positive	12.46	725029	1.38031e+06	2.48617e+06	2.16845e+06	2.0224e+06	1.2387e+06	1.55993e+06	4.46285e+06	505518	2.80142e+06	1.45023e+06	3.16554e+06	1.79703e+06	552460	971004	1.28963e+06	2.76337e+06	816778	1.79911e+06	2.71728e+06	1.70159e+06	5.43012e+06	1.8759e+06	1.70619e+06	4.49924e+06	663510	506205	2.03925e+06	754627	985741	689805	655364	2.51808e+06	892061	2.28561e+06	3.16509e+06	1.45838e+06	941122	2.36526e+06	2.52044e+06
2-Naphthylamine	Xenobiotics	Natural Product/Food/Plant	HMDB0243964	Meta_51	3.236	144.081	[M+H]+	Positive	8.98	2.03768e+06	1.37928e+06	4.01972e+06	1.81988e+06	3.49069e+06	4.82684e+06	1.20935e+06	2.47375e+06	2.61849e+06	3.94221e+06	3.72389e+06	985531	2.6981e+06	2.0145e+06	3.34094e+06	2.16741e+06	1.6725e+06	1.9787e+06	2.8481e+06	1.84986e+06	7.67163e+06	1.91869e+06	2.88706e+06	2.00243e+06	1.04141e+06	779316	662129	3.19396e+06	1.19616e+06	933540	1.28308e+06	562460	1.07945e+06	896754	5.01635e+06	5.61638e+06	2.0828e+06	809342	1.378e+06	1.69483e+06
1,3-Diphenylguanidine	Xenobiotics	Chemical		Meta_120	4.784	212.118	[M+H]+	Positive	4.91	1.37412e+06	1.37765e+06	1.89576e+06	1.49917e+06	156838	674823	1.49774e+06	1.08489e+06	230768	2.09457e+06	425444	312428	680305	96565.8	118107	2.48942e+06	411950	736438	3.20284e+06	896449	448183	1.37239e+06	414567	117119	108244	231117	158041	323032	73976.9	237282	652322	0	38677.5	515724	332892	105772	171198	171982	127260	210791
Malonylglycine	Lipid	Fatty Acid Metabolism (Acyl glycines)	HMDB0240730	Meta_422	0.942	217.048	[M-H]-	Negative_FA	459.95	406643	1.3764e+06	2.40028e+06	1.01732e+06	3.25524e+07	1.70543e+07	2.36178e+06	2.50396e+08	1.68101e+06	2.28307e+06	372267	8.21927e+06	1.24789e+06	7.14909e+06	7.99016e+06	2.81263e+06	425543	2.14338e+07	3.0262e+06	5.08276e+06	569672	413123	762360	0	3.33395e+07	220944	2.51063e+07	383606	1.15543e+06	1.21703e+06	6.02467e+06	149774	149301	6.22764e+06	354900	320932	96319.1	48063.7	233952	135377
Butyrylcarnitine	Lipid	Fatty Acid Metabolism (Acyl Carnitine)	HMDB0002013	Meta_139	2.763	232.154	[M+H]+	Positive	17.44	1.33787e+06	1.36618e+06	3.95691e+06	5.19549e+06	2.1663e+06	4.87319e+06	1.47461e+06	1.65113e+06	1.70689e+06	3.91242e+06	2.31261e+06	2.95646e+06	5.54771e+06	1.19249e+06	1.33228e+06	3.12166e+06	1.77703e+06	2.54011e+06	3.99984e+06	795989	3.45668e+06	4.28541e+06	729032	1.41626e+06	669483	1.90003e+06	246016	882039	1.11804e+06	1.3751e+06	2.50382e+06	1.49655e+06	2.6568e+06	2.71564e+06	1.94279e+06	1.92699e+06	5.37732e+06	657536	1.43561e+06	7.72086e+06
1,2,3-benzenetriol sulfate	Xenobiotics	Chemical		Meta_308	1.762	204.981	[M-H]-	Negative_NH4HCO3	63.11	102653	1.31814e+06	142119	110460	502158	5.81698e+06	64556.1	6887.56	95471	136823	101435	170045	745140	0	20267.8	6.01874e+06	42205.6	433816	8.22286e+06	437204	37890.8	1.80991e+06	0	390093	151440	242933	55705.1	0	9786.99	184784	6651.02	207546	39269.1	7517.31	0	7196.77	7.44686e+06	171419	0	1.02288e+07
Gamma-Glutamylthreonine	Peptide	Gamma-glutamyl Amino Acid	HMDB0029159	Meta_157	0.978	249.108	[M+H]+	Positive	14.35	1.73498e+06	1.28918e+06	2.28549e+06	1.02434e+06	1.19076e+06	1.32159e+06	436400	965606	757383	1.62945e+06	2.25051e+06	114953	1.26605e+06	1.02412e+06	957710	429317	980954	659780	832492	1.23237e+06	2.25788e+06	1.01023e+06	781024	421257	683169	112290	124503	807223	0	226850	0	0	0	0	1.07867e+06	1.28836e+06	265046	126160	669583	202864
Glucose 1-Phosphate	Carbohydrate	Glycolysis, Gluconeogenesis, and Pyruvate Metabolism	HMDB0001586	Meta_169	0.958	261.037	[M+H]+	Positive	51.46	1.07269e+06	1.28833e+06	0	0	486905	1.75825e+06	323073	5.9415e+07	336322	161929	553650	6.09446e+06	680293	1.26805e+06	912611	311108	715213	3.44023e+06	262683	725449	399477	1.03405e+06	497559	358785	1.39407e+08	531031	234402	397347	703615	591807	1.01545e+06	327833	1.78772e+06	1.67575e+06	179278	264948	473807	447393	887733	341817
Undecanoic Acid (C11:0)	Lipid	Medium Chain Fatty Acid	HMDB0000947	Meta_292	7.54	185.154	[M-H]-	Negative_NH4HCO3	47.12	1.07798e+06	1.28708e+06	1.20486e+06	1.28654e+06	1.07427e+06	1.10309e+06	1.26106e+06	1.22002e+06	1.14689e+06	1.31389e+06	1.01855e+06	1.47874e+06	1.25846e+06	974845	982539	1.63869e+06	1.20051e+06	1.21057e+06	1.14856e+06	1.44072e+06	1.42518e+06	1.09813e+06	1.00228e+06	1.12137e+06	1.21511e+06	1.28669e+06	810253	1.10347e+06	1.00909e+06	1.00653e+06	1.18317e+06	1.09922e+06	922896	962534	949331	971822	919137	1.04985e+06	1.39489e+06	935426
Caffeine	Xenobiotics	Xanthine Metabolism	HMDB0001847	Meta_105	3.701	195.087	[M+H]+	Positive	70.12	711392	1.2618e+06	10865244	6.36254e+06	4.73494e+07	6.20431e+07	2.38268e+08	4.5995e+06	6.51245e+06	1.05146e+07	546086	687303	4.18897e+07	194735	142905	6.31585e+07	476786	1.91726e+06	8.88619e+07	6.70488e+07	693307	4.48789e+08	1.1404e+06	662924	320680	220176	363102	1.16518e+06	652473	160015	1.65224e+06	128137	1.15429e+06	2.07191e+06	2.36872e+06	2.1241e+06	361870	369328	1.81496e+06	977439
Gly-Leu	Peptide	Dipeptide	HMDB0000759	Meta_97	2.975	189.123	[M+H]+	Positive	6547.97	1.16667e+06	1.24957e+06	3.68089e+06	2.47953e+06	2.62446e+06	2.23452e+06	504795	392486	707542	3.42902e+06	5.1246e+06	217864	964390	2.05189e+06	2.28685e+06	1.76525e+06	1.50011e+06	658644	2.19592e+06	501520	3.50856e+06	2.6405e+06	1.77773e+06	362794	236155	526251	37070.4	1.95569e+06	471291	606009	401935	381516	838317	528613	3.5045e+06	4.09516e+06	830771	196437	3.18878e+06	856099
Cytidine	Nucleotide	Pyrimidine Metabolism, Cytidine containing	HMDB0000089	Meta_146	0.979	244.093	[M+H]+	Positive	29.69	1.48529e+06	1.24135e+06	493360	2.08032e+06	3.48967e+06	1.92254e+06	3.18106e+06	795266	3.11122e+06	739746	2.31701e+06	919345	9.22262e+06	3.68285e+06	4.40696e+06	106492	3.47505e+06	1.55496e+06	0	2.6307e+06	239817	2.05071e+06	2.11778e+06	2.63775e+06	1.62613e+06	1.39254e+06	236982	2.02655e+06	3.81627e+06	4.57825e+06	3.85598e+06	1.63854e+06	4.17695e+06	3.64552e+06	2.55529e+06	2.66195e+06	1.51943e+06	1.4564e+06	1.22245e+07	1.07206e+06
SUCROSE	Unclassified	Unclassified		Meta_219	0.956	365.105	[M+Na]+	Positive	1029.32	1.03362e+06	1.214e+06	301357	107275	523739	2.37775e+07	1.01541e+06	2651232212	4.32722e+06	151675	0	4.96733e+07	2.25757e+06	294501	325178	0	1.12351e+06	3.28568e+07	336843	4.73377e+06	410900	377958	623174	136448	7.29334e+08	473054	1.62991e+06	523689	1.13695e+06	835474	2.35345e+06	369726	2.63821e+06	2.31593e+06	745528	613774	1.03174e+06	97242.4	3.17812e+06	1.11512e+06
Phe-Ile	Peptide	Dipeptide	HMDB0028998	Meta_190	4.807	279.17	[M+H]+	Positive	7.94	982697	1.20228e+06	4.23492e+06	1.2812e+06	5.05261e+06	4.35611e+06	750911	147811	2.3754e+06	3.17834e+06	9.71727e+06	330508	1.82277e+06	1.2252e+07	7.92741e+06	2.0698e+06	1.89246e+06	122595	2.08963e+06	472540	3.60695e+06	2.6339e+06	2.1305e+06	1.00685e+06	100218	884548	0	2.80855e+06	464315	886027	974437	583512	884431	1.53686e+06	6.75226e+06	4.8303e+06	7.43306e+06	351572	2.47962e+06	8.57703e+06
Aminomalonic Acid	Amino Acid	Other Amino Acid Metabolism	HMDB0001147	Meta_384	1.349	118.022	[M-H]-	Negative_FA	24.62	2.9087e+06	1.18958e+06	1.57577e+07	1.51673e+06	1.51778e+07	5.93015e+06	1.02322e+06	3.62768e+07	2.58589e+06	1.56349e+07	3.1891e+06	3.28922e+07	6.58869e+06	4.95321e+06	5.70585e+06	748053	1.56055e+06	8.67574e+06	916541	3.38316e+06	3.1184e+06	9.74816e+06	6.92535e+06	1.27655e+06	3.32971e+07	1.21249e+06	294284	7.11202e+06	1.89378e+06	2.99072e+06	7.81617e+06	1.20017e+06	4.98317e+06	8.198e+06	1.54418e+07	1.51012e+07	3.44685e+07	900108	1.86882e+06	4.23766e+07
Hexanoylglycine	Lipid	Fatty Acid Metabolism (Acyl glycines)	HMDB0000701	Meta_402	4.883	172.098	[M-H]-	Negative_FA	13.94	1.38655e+06	1.18089e+06	2.18988e+06	2.76718e+06	3.29673e+06	3.26442e+06	890097	1.10374e+06	1.12935e+06	2.25822e+06	1.81802e+06	1.55008e+06	2.90533e+06	1.41164e+06	1.5819e+06	2.89851e+06	1.47044e+06	939615	4.11515e+06	1.14595e+06	1.20475e+06	2.5874e+06	3.49349e+06	1.21128e+06	954867	975338	685377	3.76511e+06	1.02817e+06	679707	2.24312e+06	764554	1.8177e+06	2.28845e+06	8.02492e+06	8.28426e+06	3.44366e+06	744114	6.11733e+06	4.64667e+06
Phenylpyruvic Acid	Amino Acid	Phenylalanine Metabolism	HMDB0000205	Meta_399	4.721	163.04	[M-H]-	Negative_FA	16.64	889821	1.16279e+06	1.68858e+06	1.04941e+06	3.23579e+06	1.16188e+06	682668	537978	988201	1.58981e+06	4.17252e+06	968740	1.73496e+06	1.8922e+06	2.25216e+06	7.76617e+06	1.72672e+06	793709	1.0308e+07	1.1924e+06	1.12167e+06	1.19382e+06	6.87489e+06	882924	529676	878243	70389.1	7.09939e+06	1.18642e+06	1.7627e+06	4.93045e+06	877840	5.53219e+06	5.9232e+06	1.47582e+07	1.47112e+07	3.21486e+06	556348	2.8089e+06	4.42007e+06
N-Acetylarginine	Amino Acid	Urea cycle; Arginine and Proline Metabolism	HMDB0004620	Meta_122	1.011	217.129	[M+H]+	Positive	8.09	1.62224e+06	1.15621e+06	2.522e+06	5.20783e+06	3.86669e+06	2.82911e+06	1.13638e+06	2.15422e+06	1.19512e+06	2.42735e+06	2.43737e+06	1.91958e+06	2.29318e+06	2.35345e+06	2.24568e+06	1.5655e+06	2.91938e+06	809535	2.2526e+06	1.13369e+06	1.71485e+06	2.16285e+06	2.73683e+06	1.51371e+06	1.28642e+06	1.35024e+06	201119	3.09837e+06	1.0163e+06	1.44865e+06	2.23578e+06	1.2954e+06	2.59497e+06	3.15245e+06	5.83117e+06	5.65467e+06	2.57043e+06	807095	3.46391e+06	3.41345e+06
Ser-Tyr	Peptide	Dipeptide	HMDB0029051	Meta_181	1.554	269.113	[M+H]+	Positive	7.84	1.37916e+06	1.10548e+06	169615	2.65593e+06	2.1658e+06	4.11526e+06	781542	525175	1.83197e+06	172080	2.33436e+06	859390	1.42407e+06	1.63611e+06	1.7005e+06	328588	2.21883e+06	542553	389923	1.08785e+06	1.19772e+06	1.20958e+06	1.41688e+06	1.59756e+06	346901	1.34813e+06	935065	1.34772e+06	365783	467973	1.31385e+06	1.22214e+06	982004	961200	2.96401e+06	2.33832e+06	1.3081e+06	1.05879e+06	1.45005e+06	2.27827e+06
Vanillactate	Xenobiotics	Natural Product/Food/Plant	HMDB0000913	Meta_313	1.023	211.06	[M-H]-	Negative_NH4HCO3	46.59	1.1679e+06	1.08742e+06	1.43473e+06	3.01471e+06	1.20084e+06	1.39534e+06	1.06859e+06	262070	834214	1.71404e+06	1.12263e+06	1.66582e+06	1.30278e+06	553636	670750	1.00461e+06	962130	794261	1.1068e+06	1.45049e+06	307158	2.118e+06	1.27559e+06	1.04154e+06	1.46803e+06	1.41355e+06	308785	1.26113e+06	1.40708e+06	1.93921e+06	3.66723e+06	1.51381e+06	1.21936e+06	4.44717e+06	1.72039e+06	1.872e+06	808384	734912	2.07216e+06	253575
N-ACETYL-PHENYLALANINE	Unclassified	Unclassified		Meta_311	4.04	206.082	[M-H]-	Negative_NH4HCO3	74.78	848898	1.08519e+06	948395	5.73176e+06	2.11869e+06	2.12328e+06	713045	102621	459822	957279	544558	641203	2.38319e+06	1.25815e+06	1.52439e+06	3.31994e+06	1.15727e+06	366206	5.50551e+06	306971	510500	462473	1.36063e+06	1.02023e+06	835134	1.10681e+06	50174.1	1.40294e+06	288944	569487	655414	1.03973e+06	192673	769116	3.53383e+06	3.29235e+06	765389	347553	1.27724e+06	1.09279e+06
Cys-Gly, Oxidized	Amino Acid	Glutathione Metabolism	HMDB0242125	Meta_215	0.953	355.08	[M+H]+	Positive	8.36	569595	963006	420357	1.1438e+06	0	161785	588282	0	400471	487416	218855	558859	427957	297949	0	931884	791789	494101	1.15086e+06	849875	1.08119e+06	1.12662e+06	853332	308974	0	50587.3	303392	735207	128851	349667	0	131612	653788	505736	224549	688127	140818	236397	372785	282868
Azelaic acid	Unclassified	Unclassified		Meta_294	1.116	187.097	[M-H]-	Negative_NH4HCO3	36.89	936826	958733	581854	2.50561e+06	1.14899e+06	1.75192e+06	681992	386386	1.18458e+06	461882	1.34167e+06	543097	2.25385e+06	409377	338320	2.81038e+06	1.116e+06	1.16814e+06	3.57909e+06	965841	557430	426814	699214	254336	1.34824e+06	260781	248722	799942	277981	344355	1.73389e+06	299398	526215	1.79173e+06	1.18845e+06	1.2726e+06	3.14365e+06	150678	616897	4.41515e+06
Leu-Glu	Peptide	Dipeptide	HMDB0028928	Meta_172	1.554	261.145	[M+H]+	Positive	6	836103	946894	1.04872e+06	1.97737e+06	2.04565e+06	1.0752e+06	112051	123436	372236	1.1589e+06	3.85806e+06	107298	508475	1.43584e+06	1.28832e+06	533869	710689	37394.9	495186	401377	2.76174e+06	3.2764e+06	906462	318952	72505.7	304637	0	998823	108970	184683	234490	225757	240228	254525	1.9484e+06	1.92541e+06	656335	83426.5	1.44057e+06	884362
Isovalerylglycine	Amino Acid	Leucine, Isoleucine and Valine Metabolism	HMDB0000678	Meta_397	3.394	158.082	[M-H]-	Negative_FA	7.5	1.75338e+06	943471	2.80393e+06	1.95909e+06	2.88912e+06	2.2288e+06	847123	1684900	1.07471e+06	1.74097e+06	2.85644e+06	1.92714e+06	2.0444e+06	1.89072e+06	1.44342e+06	2.09502e+06	1.62458e+06	1.24399e+06	2.34135e+06	1.97928e+06	1.52574e+06	2.81616e+06	1.79017e+06	1.47438e+06	1.6672e+06	1.26556e+06	1.17621e+06	2.14042e+06	1.53213e+06	1.20587e+06	1.85517e+06	1.02246e+06	1.89254e+06	2.59368e+06	4.25135e+06	3.40553e+06	2.85309e+06	974710	1.90023e+06	3.50776e+06
Glucosamine 6-Phosphate	Carbohydrate	Amino sugar and Nucleotide sugar Metabolism	HMDB0001254	Meta_332	0.875	258.039	[M-H]-	Negative_NH4HCO3	37.83	721614	922910	155230	430179	1.59473e+06	525650	219805	570130	414315	370215	694542	609943	1.09685e+06	54453.2	256677	367576	769217	551433	467959	684180	504223	1.08479e+06	98804.6	677707	1.20832e+06	77378	130558	209416	111140	139239	78552.6	38467.4	444638	124649	350374	447402	282336	393196	588364	422891
Ile-Ile	Peptide	Dipeptide	HMDB0028910	Meta_147	4.098	245.185	[M+H]+	Positive	4.28	532534	915765	989906	1.13212e+06	1.91431e+06	3.64612e+06	138780	0	648727	1.06642e+06	4.37277e+06	42039.1	899962	4.31546e+06	3.16969e+06	834276	1.00575e+06	28150.3	786237	235776	2.30002e+06	1.91379e+06	1.29747e+06	278475	0	128868	0	1.54892e+06	76647	181489	246980	77460.5	892208	224607	2.66866e+06	2.52901e+06	1.07967e+06	39912	1.22348e+06	1.17802e+06
Ile-Val	Peptide	Dipeptide	HMDB0028920	Meta_138	2.958	231.17	[M+H]+	Positive	5.31	701439	911636	398568	1.39405e+06	2.31204e+06	588497	171176	0	172487	413333	2.97163e+06	87795.9	221410	1.35048e+06	1.11942e+06	644349	808951	0	731263	139524	2.80217e+06	2.54112e+06	363060	115860	0	107609	0	398004	43170.6	87468.7	65280.9	96274.3	152491	105079	930174	849825	445158	0	1.54937e+06	385587
Lys-Leu	Peptide	Dipeptide	HMDB0028955	Meta_166	1.549	260.196	[M+H]+	Positive	26540.1	953540	908325	1.25043e+06	1.48926e+06	1.85279e+06	628996	212474	214944	397832	760284	3.03646e+06	73555.7	374964	1.01638e+06	1.05069e+06	831706	1.45829e+06	33266.9	1.04721e+06	230406	1.41809e+06	2.43736e+06	561944	98696.5	37233.8	317397	0	485217	96627.9	241493	109745	290425	233126	165693	1.38283e+06	1.25251e+06	678009	0	1.56834e+06	838781
AMP	Nucleotide	Purine Metabolism, Adenine containing	HMDB0000045	Meta_368	0.929	346.056	[M-H]-	Negative_NH4HCO3	30.15	653079	887044	198784	872000	509004	1.23363e+06	375717	55453.7	877235	184663	746140	805796	1.28133e+06	402417	265510	650530	635033	586634	723964	546063	499336	755679	790110	699795	1.01313e+06	680343	139381	835040	467417	509097	1.2894e+06	651371	776194	1.2035e+06	874579	1.18357e+06	669599	504139	930711	568134
Oxalic Acid	Cofactors and Vitamins	Ascorbate and Aldarate Metabolism	HMDB0002329	Meta_233	0.851	88.9872	[M-H]-	Negative_NH4HCO3	17.85	1.75453e+06	883287	1.40277e+06	2.51063e+06	1.32692e+06	1.54809e+06	977843	1.71351e+06	1.43812e+06	1.42763e+06	635630	1.82611e+06	1.47116e+06	1.0691e+06	574983	2.15282e+06	1.00426e+06	1.88314e+06	1.59786e+06	1.35594e+06	1.28192e+06	882688	890769	675419	6.4691e+06	959807	947848	1.17292e+06	736557	800498	1.30967e+06	1.44253e+06	860802	905337	1.04631e+06	1.41567e+06	311908	881579	2.04643e+06	568372
Tetrahydrocortisone 3-Glucuronide	Lipid	Corticosteroids	HMDB0010357	Meta_440	5.806	539.242	[M+K]+	Negative_FA	133706	441185	871769	323076	2.09716e+06	1.12474e+06	323604	271930	219983	277422	312538	533968	166126	524858	468709	496516	579779	716250	53174	760188	405192	253215	1.27415e+06	1.13089e+06	287752	50265.4	106971	0	1.22166e+06	129011	230274	135091	110911	192046	177977	2.34456e+06	2.63806e+06	568025	89847.3	563012	639739
Phe-Phe	Peptide	Dipeptide	HMDB0013302	Meta_208	5.337	313.153	[M+H]+	Positive	21.77	1.40824e+06	871190	167735	3.9521e+06	5.90885e+06	5.46772e+06	1.83541e+06	1.2531e+06	3.52406e+06	62444.3	4.76393e+06	2.37905e+06	5.07014e+06	3.57701e+06	926887	260554	2.86659e+06	796443	145124	1.52358e+06	1.36642e+06	4.07429e+06	1.37165e+06	4.30614e+06	795957	2.61031e+06	126399	1.5588e+06	951856	1.46648e+06	4.741e+06	1.70153e+06	2.00008e+06	6.85781e+06	6.62351e+06	1.52363e+06	1.72307e+06	1.28139e+06	3.30102e+06	4.64586e+06
N2-Acetyl,N6-Methyllysine	Amino Acid	Lysine Metabolism	HMDB0242186	Meta_112	1.035	203.139	[M+H]+	Positive	6.61	368656	862786	1.45986e+06	1.48012e+06	966849	1.08657e+06	448123	318892	317243	1.61218e+06	909006	682179	681548	465991	499075	2.21323e+06	745704	434878	2.77286e+06	277496	2.30957e+06	1.47681e+06	489557	963925	625064	800093	94845	645954	322122	519007	833625	821126	614070	956646	1.25104e+06	1.29275e+06	2.36668e+06	319146	783579	2.87011e+06
Erythronic Acid	Carbohydrate	Amino sugar and Nucleotide sugar Metabolism	HMDB0000613	Meta_256	1.187	135.03	[M-H]-	Negative_NH4HCO3	19.81	909911	855291	424696	2.2868e+06	772458	655469	358867	322139	307035	456418	907570	71815.2	1.61489e+06	1.02294e+06	928798	106220	531135	362709	117583	268380	1.10459e+06	442503	838942	150755	121055	515374	5933.33	955899	530692	673392	352643	441859	398948	431209	1.58559e+06	2.00524e+06	79316.9	36195.3	2.62553e+06	119012
Acesulfame	Xenobiotics	Natural Product/Food/Plant	HMDB0033585	Meta_273	1.505	161.986	[M-H]-	Negative_NH4HCO3	372.11	292878	843497	0	19473.8	6771.03	1.4045e+06	5.53712e+06	13600.7	73024.3	0	322531	0	8.73757e+07	421323	450394	1.40683e+07	2.29946e+06	1.6091e+06	1.99958e+07	9.29393e+06	0	7246.31	0	700049	7656.76	0	0	0	0	0	73480.3	0	2.2926e+06	97770.7	0	0	0	312879	0	0
Tryptophan Betaine	Amino Acid	Tryptophan Metabolism	HMDB0061115	Meta_155	3.39	247.144	[M+H]+	Positive	4.45	551534	841153	1.00395e+06	419253	1.53025e+06	300776	80885.3	42061.5	362157	1.01046e+06	475121	829616	1.60488e+06	0	0	1.42855e+06	215606	104096	1.62779e+06	66936.8	358851	198348	77124	1.66404e+06	0	1.12761e+06	0	165813	222090	313268	250852	991279	798087	388888	347468	433662	348403	753838	70213.1	347334
P-Cresol Sulfate	Xenobiotics	Benzoate Metabolism	HMDB0011635	Meta_293	4.792	187.006	[M-H]-	Negative_NH4HCO3	37.95	1.84964e+06	829004	196729	4.28281e+06	2.29193e+06	4.58322e+06	805778	397137	413391	141144	1.22591e+06	97469	1.84409e+06	2.21449e+06	2.10369e+06	1.7245e+06	38012.1	1.59045e+06	2.63412e+06	1.61192e+06	436056	936168	458966	452590	844975	2.67104e+06	62063.7	414426	392920	578477	2.85805e+06	2.2618e+06	333785	3.08646e+06	758752	737506	1.87763e+06	291612	19657.7	2.4258e+06
Dimethylarginine (SDMA + ADMA)	Amino Acid	Urea cycle; Arginine and Proline Metabolism	HMDB0001539	Meta_113	0.936	203.15	[M+H]+	Positive	13.66	1.22649e+06	823046	2.70234e+06	2.22563e+06	2.2587e+06	1.93782e+06	459207	1.25592e+06	758428	2.62424e+06	2.94487e+06	1.92093e+06	1.25262e+06	922631	1.39715e+06	2.14251e+06	1.32667e+06	937120	2.45002e+06	1.00602e+06	3.26829e+06	1.8728e+06	772450	1.35579e+06	1.50771e+06	734929	342124	839483	412389	439664	840824	481584	589868	877511	1.92154e+06	1.9912e+06	2.18389e+06	946434	1.19063e+06	2.69231e+06
Arg-Leu	Peptide	Dipeptide	HMDB0028713	Meta_196	1.459	288.202	[M+H]+	Positive	148234	772999	798976	1.20421e+06	1.83112e+06	3.98107e+06	7.3482e+06	783285	435161	2.29318e+06	993516	2.75377e+06	427370	4.13047e+06	5.34545e+06	6.27983e+06	1.93894e+06	917451	256768	1.99907e+06	1.65581e+06	995708	1.76552e+06	1.52382e+06	1.20671e+06	204626	1.38597e+06	0	1.52088e+06	2.34953e+06	2.85252e+06	2.14258e+06	1.13587e+06	2.20101e+06	2.63045e+06	4.25594e+06	4.04664e+06	2.82525e+06	241264	9.38077e+06	4.65549e+06
Phe-Val	Peptide	Dipeptide	HMDB0029008	Meta_176	3.886	265.154	[M+H]+	Positive	7.73	768383	789618	553282	2.68791e+06	3.44483e+06	1.2522e+06	574179	84375.2	476040	350678	5.82061e+06	149573	478414	2.50624e+06	1.58712e+06	947683	970597	141735	915033	422612	3.9112e+06	3.96843e+06	439521	213333	31144.9	519853	0	438430	67038.2	116515	199233	349676	483638	264552	1.36256e+06	1.13794e+06	680397	33492.8	1.94036e+06	786537
Ser-Ile	Peptide	Dipeptide	HMDB0029042	Meta_125	2.409	219.133	[M+H]+	Positive	6.56	552918	785453	854019	1.66369e+06	1.67654e+06	776894	183697	0	265494	582470	2.32438e+06	0	416503	968003	955706	854783	485110	0	786999	94048.7	1.9103e+06	1.56637e+06	392694	34683.1	0	150118	0	472383	30444.2	35890.5	27716	166640	344999	69856.8	928300	780510	709462	0	1.08378e+06	703974
Val-Val	Peptide	Dipeptide	HMDB0029140	Meta_123	1.926	217.155	[M+H]+	Positive	9.97	459902	781672	553731	1.48982e+06	2.11176e+06	700439	115230	0	336773	638651	2.82887e+06	54022.4	355702	1.45803e+06	1.57451e+06	624286	594810	37307.6	570709	215805	1.93858e+06	2.60573e+06	566721	160029	52150	180412	38858.8	544323	130532	90378.6	26940.8	162101	350835	195222	1.44157e+06	1.34498e+06	675531	28262.4	1.95671e+06	444464
2-Methylcytidine	Nucleotide	Pyrimidine Metabolism, Cytidine containing	HMDB0242132	Meta_162	1.007	258.109	[M+H]+	Positive	10.18	773364	779511	1.26475e+06	2.53433e+06	1.63147e+06	1.17209e+06	685283	2.05438e+06	488692	897387	1.68578e+06	562685	901829	1.82171e+06	1.96192e+06	855553	1.44831e+06	240274	856374	153951	429173	3.51062e+06	3.09334e+06	554526	2.06155e+06	818218	208358	4.36013e+06	1.35277e+06	1.72699e+06	2.37061e+06	748998	341836	3.43138e+06	7.37992e+06	6.19968e+06	270591	420703	6.12437e+06	581494
Propionic acid	Unclassified	Unclassified		Meta_378	1.349	73.0285	[M-H]-	Negative_FA	84.39	2.64438e+06	779404	1.65665e+07	1.2777e+06	1.65574e+07	5.85178e+06	754779	3.98413e+07	2.27193e+06	1.64958e+07	3.02121e+06	3.63889e+07	7.07044e+06	4.76131e+06	5.83846e+06	634815	1.20819e+06	8.65371e+06	738872	3.35911e+06	2.97671e+06	1.10093e+07	6.94299e+06	889316	3.61722e+07	1.1249e+06	251396	7.87525e+06	1.6689e+06	2.69447e+06	7.32008e+06	1.03338e+06	4.68232e+06	9.04655e+06	1.65038e+07	1.58423e+07	3.63576e+07	548818	1.40289e+06	4.58333e+07
3-Methylindole	Xenobiotics	Natural Product/Food/Plant	HMDB0000466	Meta_40	3.23	132.081	[M+H]+	Positive	2.86	932142	776669	1.93964e+06	885413	2.07775e+06	2.09163e+06	623528	1.25529e+06	1.47473e+06	2.0937e+06	1.81406e+06	344948	1.60258e+06	1.0435e+06	1.57166e+06	1.34798e+06	1.07655e+06	1.31152e+06	1.69839e+06	1.14931e+06	3.89317e+06	1.05998e+06	1.30995e+06	884985	666585	487911	512548	1.68658e+06	555275	677437	562976	125975	249942	538665	3.14673e+06	3.4642e+06	878313	685064	694868	1.32786e+06
Epigallocatechin	Xenobiotics	Natural Product/Food/Plant	HMDB0001871	Meta_204	1.028	307.083	[M+H]+	Positive	12102.9	54459.7	768306	0	219094	0	73508.5	195374	257499	58929	79045.2	0	54188.1	1.00045e+06	531997	713713	611183	411593	468418	491527	1.87216e+06	468791	0	0	512188	0	428039	0	0	130486	212934	0	158356	459057	249937	0	0	0	507867	265107	0
Trp-Glu	Peptide	Dipeptide	HMDB0029082	Meta_211	3.079	334.138	[M+H]+	Positive	138986	901049	767987	3.08813e+06	748588	1.28849e+06	960837	171900	145538	673800	3.13835e+06	2.25026e+06	180650	520376	1.36947e+06	1.3468e+06	786754	363619	520391	1.20303e+06	624952	3.41575e+06	478697	318497	231524	68207.5	437785	0	392192	320774	445344	199535	284273	35459.9	254633	1.02527e+06	875170	517371	138873	290800	670474
2-Hydroxyphenylacetic Acid	Amino Acid	Phenylalanine Metabolism	HMDB0000669	Meta_396	6.033	151.039	[M-H]-	Negative_FA	5.42	699595	767925	773935	844162	1.16252e+06	893110	542750	463956	1.07458e+06	1.07575e+06	1.02885e+06	749020	665581	805546	1.36495e+06	960223	1.09189e+06	1.18126e+06	1.32687e+06	917237	1.21683e+06	1.01118e+06	885825	975382	815137	513732	1.191e+06	628729	1.20746e+06	952157	580653	908877	1.20646e+06	688616	651707	1.03359e+06	1.3599e+06	1.01885e+06	706713	473564
Leu-Trp	Peptide	Dipeptide	HMDB0028940	Meta_209	5.216	318.181	[M+H]+	Positive	8.55	338564	767659	223889	1.2957e+06	2.38792e+06	1.63275e+06	222587	0	230694	135329	2.4521e+06	258510	904646	1.57934e+06	1.12289e+06	596690	778680	87165.9	703755	118854	1.83682e+06	2.19819e+06	309691	611798	42530.9	112179	0	257864	0	0	174267	100091	791302	352105	1.02467e+06	692076	571861	146629	528904	827622
Hydroxypyruvic Acid	Amino Acid	Glycine, Serine and Threonine Metabolism	HMDB0001352	Meta_239	0.835	103.003	[M-H]-	Negative_NH4HCO3	17.3	619638	759126	481802	1.22519e+06	816852	1.19743e+06	516989	1.21384e+06	712792	661046	608061	632948	1.08559e+06	574140	885219	774366	890480	681682	1.108e+06	425402	1.44743e+06	573552	2.21095e+06	145646	199698	782705	329708	2.00707e+06	755601	754220	918706	821416	354748	1.02689e+06	2.69096e+06	1.58484e+06	768502	288323	1.113e+06	623226
4-Hydroxyphenylpyruvic Acid	Amino Acid	Tyrosine Metabolism	HMDB0000707	Meta_286	1.611	179.034	[M-H]-	Negative_NH4HCO3	10.05	461351	758942	1.62012e+06	1.09313e+06	3.69952e+06	681948	603420	205442	343932	1.72464e+06	1.22196e+06	1.20503e+06	820191	594948	586729	855257	1.46159e+06	331535	1.17977e+06	583196	1.0506e+06	802181	751877	1.11197e+06	1.53754e+06	692539	59564.9	907042	396786	873881	1.03155e+06	572080	29517.7	1.20652e+06	1.77399e+06	1.92063e+06	829368	369368	783599	1.11118e+06
Ile-Ala	Peptide	Dipeptide	HMDB0028900	Meta_109	1.546	203.139	[M+H]+	Positive	29.42	852673	757970	3.25174e+06	2.75074e+06	7.33055e+06	1.77523e+06	501676	479095	601028	2.59479e+06	1.15146e+07	1.97159e+06	3.56226e+06	5.23064e+06	3.0339e+06	732264	2.89593e+06	249089	801827	968185	2.36493e+06	1.581e+07	809278	1.27683e+06	3.58836e+06	826153	0	871668	1.08205e+06	1.70148e+06	5.74696e+06	618978	1.2908e+06	5.89151e+06	2.25914e+06	1.27229e+06	4.33708e+06	507602	1.17295e+07	5.47742e+06
Tetradecanedioate (C14-DC)	Lipid	Fatty Acid, Dicarboxylate	HMDB0000872	Meta_429	6.451	257.176	[M-H]-	Negative_FA	82316	702707	744685	813500	1.01047e+06	922835	792372	785583	807806	958688	794425	1.23935e+06	839759	763413	759818	707932	943862	1.18153e+06	775355	1.12251e+06	671571	749330	898833	803035	818599	522131	725362	623196	674214	787175	589459	915019	754033	885211	891226	947559	1.11957e+06	1.19893e+06	701548	805606	1.38548e+06
Glyceraldehyde 3-Phosphate	Carbohydrate	Glycolysis, Gluconeogenesis, and Pyruvate Metabolism	HMDB0001112	Meta_279	0.848	168.991	[M-H]-	Negative_NH4HCO3	56.55	753863	741138	1.12502e+06	2.33645e+06	2.3361e+06	3.22671e+06	1.0376e+06	1.54686e+06	1.48702e+06	1.29861e+06	1.54309e+06	3.824e+06	2.58444e+06	738819	783498	1.22185e+06	661658	1.1473e+06	1.63972e+06	966361	2.05146e+06	1.63287e+06	339294	1.55182e+06	1.7815e+06	936550	174284	443531	577589	755431	615987	863257	1.48576e+06	745296	771934	634354	544995	938528	1.08665e+06	1.35143e+06
Gly-Ile	Peptide	Dipeptide	HMDB0028844	Meta_98	2.685	189.123	[M+H]+	Positive	1948.09	1.01414e+06	738413	821793	2.8865e+06	1.61116e+06	2.21453e+06	583478	248967	552749	863344	2.21448e+06	215766	849742	2.5683e+06	2.82924e+06	1.22289e+06	563603	603980	1.32732e+06	304157	1.70897e+06	1.32735e+06	1.15449e+06	462986	120408	569944	28887.8	1.51539e+06	389923	506004	168717	364310	286805	303946	3.02044e+06	3.02662e+06	2.76946e+06	99776	1.50668e+06	3.25025e+06
Gamma-Glutamylglutamine	Peptide	Gamma-glutamyl Amino Acid	HMDB0011738	Meta_186	0.967	276.119	[M+H]+	Positive	34753.4	1.06578e+06	736117	7.03042e+06	498595	2.34389e+06	1.36748e+06	511657	2.41425e+06	1.47969e+06	5.52632e+06	8.69443e+06	899504	1.01347e+06	2.37811e+06	2.94341e+06	1.20532e+06	1.13469e+06	771729	1.29159e+06	829450	2.53047e+06	2.40484e+06	1.30993e+06	945464	1.56572e+06	2.10952e+06	59955.7	1.54002e+06	2.47298e+06	2.16819e+06	1.78413e+06	1.75634e+06	712845	2.42436e+06	2.69744e+06	2.33417e+06	519085	563077	4.63268e+06	658929
Ketoisovaleric Acid	Amino Acid	Leucine, Isoleucine and Valine Metabolism	HMDB0000019	Meta_244	1.437	115.039	[M-H]-	Negative_NH4HCO3	4.14	498720	733594	1.33781e+06	920534	1.15019e+06	1.09774e+06	669625	1.07422e+06	628704	1.81355e+06	1.25897e+06	1.40031e+06	870756	733915	667990	1.25766e+06	918023	871844	1.75498e+06	794452	1.46498e+06	661980	931934	930201	1.70333e+06	792241	206510	797907	699050	789491	1.56384e+06	808556	509283	1.24479e+06	1.48969e+06	1.46135e+06	841277	570407	675051	1.05331e+06
Isovalerylcarnitine (C5)	Amino Acid	Leucine, Isoleucine and Valine Metabolism	HMDB0000688	Meta_152	4.054	246.17	[M+H]+	Positive	13.09	1.00049e+06	726071	2.00094e+06	6.52048e+06	1.61646e+06	3.28023e+06	1.30627e+06	1.63262e+06	1.12177e+06	2.0314e+06	2.44693e+06	1.72118e+06	9.28062e+06	1.6614e+06	2.1385e+06	3.2917e+06	2.36979e+06	3.01983e+06	4.75646e+06	611739	4.39369e+06	1.28566e+06	540539	1.17743e+06	1.79266e+06	3.36545e+06	238759	563756	577099	796683	2.71396e+06	2.75212e+06	741506	2.75187e+06	1.45543e+06	1.50071e+06	3.35937e+06	562894	1.1908e+06	4.65647e+06
Mannitol/Sorbitol	Carbohydrate	Polysaccharides and Oligosaccharides	HMDB0000247	Meta_288	0.96	181.071	[M-H]-	Negative_NH4HCO3	392.62	168401	707595	610476	832847	1.31935e+07	8.09973e+06	974708	204329122	819334	684736	91811.6	3.02941e+06	502177	4.00184e+06	3.14147e+06	866777	223780	1.85486e+07	1.17865e+06	1.6114e+06	197983	89334.7	291469	188278	5.8554e+07	162554	2.63091e+07	20707.9	591668	665271	3.40123e+06	232669	132732	3.61383e+06	9384.75	75597.7	29473.4	104651	12055.2	6679.04
Guanosine	Nucleotide	Purine Metabolism, Guanine containing	HMDB0000133	Meta_193	1.24	284.099	[M+H]+	Positive	22822.4	434118	693762	277875	2.02447e+06	461129	715440	1.0406e+06	360445	268645	406587	0	0	2.18528e+06	1.32608e+06	1.4212e+06	0	432608	310307	0	540969	690699	0	1.08799e+06	565766	0	336306	0	1.18747e+06	1.41542e+06	1.93039e+06	3.65443e+06	490173	4.09502e+06	3.54379e+06	1.63867e+06	1.77765e+06	110663	986799	1.6311e+07	120350
Gamma-Aminobutyric Acid	Amino Acid	Alanine, Aspartate and Glutamate Metabolism	HMDB0000112	Meta_238	0.89	102.055	[M-H]-	Negative_NH4HCO3	41.14	890652	682051	3.89137e+06	685888	2.05803e+06	1.89828e+06	460324	1.61032e+07	426740	4.4184e+06	1.45451e+06	1.17068e+06	932097	1.60667e+06	1.06601e+06	1.15239e+06	512692	371508	1.2966e+06	981965	1.08598e+06	994845	1.07477e+06	382048	808735	293270	80025.7	931496	360946	567639	489785	309553	626787	656378	1.57132e+06	1.35175e+06	324271	339409	654215	315803
L-Serine	Amino Acid	Glycine, Serine and Threonine Metabolism	HMDB0000187	Meta_240	0.941	104.035	[M-H]-	Negative_NH4HCO3	61.36	615908	681451	2.46886e+06	939055	1.40818e+06	2.71632e+06	1.33626e+06	221149	816507	2.51255e+06	1.01441e+06	985919	1.9101e+06	783142	789479	1.85317e+06	299353	2.34043e+06	2.09033e+06	3.23514e+06	747345	1.46585e+06	800790	1.04997e+06	2.87073e+06	304909	412349	817041	431625	664948	1.28375e+06	407922	788161	1.19052e+06	820895	1.22272e+06	731409	883443	1.38271e+06	514827
3-Methylxanthine	Xenobiotics	Xanthine Metabolism	HMDB0001886	Meta_79	1.385	167.056	[M+H]+	Positive	21.95	205983	678854	7.9489e+06	4.50078e+06	1.29405e+07	3.45479e+06	344841	359137	1.64087e+06	8.03538e+06	124079	411325	952969	164183	287884	842439	469462	1.02431e+06	901530	481848	243619	1.97056e+06	522485	506575	224270	231441	696353	525921	204733	11912.2	661925	281808	603023	1.00923e+06	952064	576177	138749	343116	562218	609282
Ile-Arg	Peptide	Dipeptide	HMDB0028901	Meta_197	1.054	288.203	[M+H]+	Positive	58628.3	300993	676015	0	1.02206e+06	2.49948e+06	2.47176e+06	102060	71719	1.42401e+06	0	1.93887e+06	427699	1.49823e+06	1.86995e+06	143153	243834	1.25409e+06	0	336335	485164	432009	804788	179849	944339	397593	1.3405e+06	0	1.18099e+06	0	62455.3	1.70622e+06	790653	1.06442e+06	2.55936e+06	1.87988e+06	1.84857e+06	1.79356e+06	64333	1.11402e+06	3.34032e+06
Gamma-Glutamylisoleucine	Peptide	Gamma-glutamyl Amino Acid	HMDB0011170	Meta_173	3.38	261.145	[M+H]+	Positive	4.52	1.02086e+06	670666	797158	1.32665e+06	1.53689e+06	1.9878e+06	625091	360625	358417	868282	684569	3.02967e+06	1.70707e+06	535221	589168	468605	645365	426263	627513	1.32334e+06	570511	482991	1.08354e+06	619868	312000	194470	104500	933479	199540	428946	332490	111809	345752	300418	2.14317e+06	2.53824e+06	310442	259839	701955	283046
Ile-Glu	Peptide	Dipeptide	HMDB0028906	Meta_170	1.442	261.144	[M+H]+	Positive	5.24	639818	663717	1.39063e+06	970365	1.49479e+06	977887	149668	168248	329795	1.20052e+06	2.62371e+06	205738	394027	719671	1.0147e+06	562753	904159	124572	530328	193158	1.99882e+06	1.25927e+06	765612	358785	0	165773	0	878276	149609	216396	179840	219388	158296	220029	1.67091e+06	1.78527e+06	534954	37439.2	720437	370787
Inosine	Nucleotide	Purine Metabolism, (Hypo)Xanthine/Inosine containing	HMDB0000195	Meta_180	1.24	269.088	[M+H]+	Positive	6.69	953237	663089	0	1.1559e+06	0	837084	355469	190711	512810	0	154019	0	995548	927014	1.63715e+06	0	447582	499345	0	626867	219412	0	315079	107135	0	103141	0	302467	288673	475583	431349	196504	862503	508384	411088	800689	0	260109	5.27247e+06	0
N,N-Dimethyl-Proline-Proline Betaine	Amino Acid	Urea cycle; Arginine and Proline Metabolism		Meta_144	1.306	241.155	[M+H]+	Positive	9.26	861737	653153	1.14381e+06	2.4666e+06	1.75231e+06	1.85068e+06	480894	966548	1.01658e+06	1.41307e+06	1.09372e+06	1.81653e+06	2.36616e+06	714043	1.00033e+06	2.41461e+06	1.03493e+06	519681	2.40857e+06	325498	2.04649e+06	1.84402e+06	548051	871352	1.02393e+06	1.16621e+06	0	746970	364367	226928	1.34125e+06	648488	1.05125e+06	1.19163e+06	2.07681e+06	2.59928e+06	2.32628e+06	258679	633548	4.08745e+06
Deoxyadenosine	Nucleotide	Purine Metabolism, Adenine containing	HMDB0000101	Meta_159	1.243	252.109	[M+H]+	Positive	6.52	966039	641387	287575	1.10979e+06	1.04329e+06	1.14892e+06	593289	88760.2	357360	377573	567593	0	0	1.64051e+06	2.15608e+06	356268	196377	0	326065	288801	3.05298e+06	108223	675433	413871	72992.3	0	0	840175	1.26544e+06	1.8709e+06	607354	97340.2	312815	961972	1.59651e+06	1.4703e+06	790520	146054	387384	718409
His-Leu	Peptide	Dipeptide	HMDB0028889	Meta_183	1.393	269.16	[M+H]+	Positive	8.96	1.87506e+06	612491	2.29778e+06	1.71358e+06	1.95444e+06	851655	640788	1.1463e+06	276002	1.87908e+06	2.7479e+06	168945	456626	984095	778693	843094	645786	212953	953914	647560	5.69731e+06	4.21632e+06	1.01088e+06	815023	65716	369049	0	1.35376e+06	141234	242575	237259	232237	295239	326646	3.14917e+06	2.90708e+06	1.66753e+06	262669	884424	2.05358e+06
Tartaric Acid	Carbohydrate	Glyoxylate and dicarboxylate metabolism	HMDB0000956	Meta_263	0.842	149.008	[M-H]-	Negative_NH4HCO3	13.21	5.7956e+06	611354	104826	1.72236e+06	37192.1	290198	425447	111143	228911	431074	212222	2.09615e+06	619334	1.95259e+06	80668.2	112623	492545	686947	228738	827301	425851	94580.7	682613	72344.9	1.76314e+06	204733	23806.3	926076	1.95054e+06	3.08898e+06	1.24884e+06	211244	693973	1.98793e+06	764638	1.2138e+06	103157	259049	469600	139022
2'-O-Methyluridine	Nucleotide	Pyrimidine Metabolism, Uracil containing	HMDB0240328	Meta_163	0.98	259.093	[M+H]+	Positive	8.4	715405	602053	3.66658e+06	262248	1.46598e+06	1.12371e+06	338749	490324	1.02087e+06	2.54365e+06	3.3916e+06	125077	497585	2.18514e+06	2.70534e+06	959980	894032	407179	1.82393e+06	591835	1.78041e+06	621472	783875	686571	503984	1.37915e+06	0	1.09341e+06	1.23184e+06	1.21642e+06	669157	1.07419e+06	300600	686582	1.34061e+06	1.35856e+06	373587	367347	2.06977e+06	325649
Arachidonic Acid (C20:4n6)	Lipid	Long Chain Fatty Acid	HMDB0001043	Meta_351	7.984	303.233	[M-H]-	Negative_NH4HCO3	168.27	1.7685e+06	577556	2.96415e+06	5.01224e+06	3.77005e+06	606350	668066	710927	264888	2.69419e+06	754998	267493	730800	229732	308298	2.24119e+06	1.56674e+06	403767	2.83993e+06	2.30629e+06	3.78673e+07	4.60474e+06	230935	970103	59882.2	1.2685e+06	10928	286874	33895.1	114852	662481	797186	190104	970783	782514	778286	141433	258934	1.02674e+07	39084
Gamma-Glutamylvaline	Peptide	Gamma-glutamyl Amino Acid	HMDB0011172	Meta_154	1.913	247.128	[M+H]+	Positive	5.11	939645	547657	930013	783521	1.49538e+06	2.1806e+06	808705	593833	243924	881427	977039	3.51943e+06	2.2585e+06	402796	422427	576542	733384	473709	627310	1.3294e+06	876899	857259	640060	412055	335003	82680.2	63058.4	732377	88905.8	93326.2	463501	0	547956	591054	1.55133e+06	1.61302e+06	252502	286557	872066	313977
Leu-Gly-Leu	Peptide	Small peptide		Meta_203	5.323	302.207	[M+H]+	Positive	5.18	343027	515770	512907	2.37061e+06	556128	828938	57358	105330	224023	592655	799802	0	513014	965808	1.01714e+06	727811	565257	0	967552	53493.4	1.35639e+06	883846	597740	580192	0	0	0	717379	52586.6	125998	624807	49954.2	1.05659e+06	802213	1.4149e+06	1.28096e+06	1.25262e+06	274292	1.50679e+06	1.21618e+06
Heptanoic Acid (C7:0)	Lipid	Medium Chain Fatty Acid	HMDB0000666	Meta_251	6.442	129.091	[M-H]-	Negative_NH4HCO3	9.86	364365	506878	423396	706448	1.6678e+06	413927	199928	296649	343773	549616	274105	459624	654670	395784	406520	484877	675273	295790	604027	446761	815660	378039	255673	372174	535040	443027	191340	317541	143455	401185	408512	697389	491064	425670	423469	208467	272985	346534	159817	276202
Ile-Tyr	Peptide	Dipeptide	HMDB0028919	Meta_201	3.188	295.165	[M+H]+	Positive	7005.22	417175	502053	33715	868724	1.13939e+06	584814	27189.1	0	336703	111257	2.62522e+06	0	122672	1.53408e+06	697439	548154	880002	0	500479	66825.9	1.13974e+06	1.6079e+06	781676	161544	0	35685.3	0	787337	39515.9	77411.7	31177.2	0	87259.5	50052.6	1.85099e+06	1.43873e+06	1.4169e+06	0	341482	1.74378e+06
Cysteinylglycine	Amino Acid	Glutathione Metabolism	HMDB0000078	Meta_89	0.851	179.054	[M+H]+	Positive	4.03	609769	494892	1.40792e+06	501256	1.03555e+06	1.56535e+06	630213	1.0115e+06	373510	1.00153e+06	638500	433612	780515	726546	1.22255e+06	781114	734109	308576	1.08877e+06	321409	797780	226558	699537	111736	773855	139958	582726	887442	244028	681773	651930	207051	2.70444e+06	273158	714663	1.09284e+06	1.43552e+06	829144	1.58197e+06	977006
Sedoheptulose 7-Phosphate	Carbohydrate	Pentose phosphate pathway	HMDB0001068	Meta_345	0.846	289.033	[M-H]-	Negative_NH4HCO3	37.75	589118	493551	301110	1.01728e+06	901527	587344	245365	972737	449556	378991	687057	1.35284e+06	914757	648099	647021	25765	1.32476e+06	195749	117363	262692	729432	800705	503696	256018	1.54282e+06	271386	0	572816	613362	708058	764970	145611	658989	844955	1.07932e+06	1.14269e+06	95454.7	65092.3	624978	262276
Lauroylglycine	Lipid	Fatty Acid Metabolism (Acyl glycines)	HMDB0013272	Meta_427	6.689	256.192	[M-H]-	Negative_FA	781091	236563	469600	513813	2.18662e+06	1.15755e+06	173146	1.03412e+06	288489	604775	489860	1.78906e+06	1.21733e+06	279737	148211	218687	2.73104e+07	254907	347366	3.8417e+07	506651	452993	190708	285781	2.45476e+06	531876	232313	248303	352352	170753	598372	469333	260887	210646	689987	550708	597827	244303	1.22818e+06	177971	305328
Phosphoenolpyruvate	Carbohydrate	Glycolysis, Gluconeogenesis, and Pyruvate Metabolism	HMDB0000263	Meta_276	0.811	166.974	[M-H]-	Negative_NH4HCO3	11.43	1.60687e+06	458453	430976	2.33849e+06	1.52816e+06	602053	196415	189151	631957	440114	1.60577e+06	576899	949133	270526	65200.7	262743	1.92474e+06	143642	382284	124841	2.14287e+06	683962	195695	657214	979995	427323	0	173576	280052	343328	416855	289888	20780.3	446266	412451	495132	106649	328844	615648	373137
Cyclamate	Xenobiotics	Chemical	HMDB0031340	Meta_408	3.308	178.054	[M-H]-	Negative_FA	30.03	106324	452446	60024.7	284000	117478	639399	2.27135e+06	30785.6	53567.5	117514	131614	19052	6.60886e+06	98315.6	361144	2.363e+06	4.99775e+06	231586	3.54332e+06	791435	49867.9	76369.5	19982.7	1.11467e+06	123409	80140.5	33180.4	133743	127486	147487	117691	36313.7	231493	109491	45641.3	156435	162390	593397	154428	137877
Gly-His	Peptide	Dipeptide	HMDB0028843	Meta_418	0.879	211.083	[M-H]-	Negative_FA	17.34	504067	451900	1.63776e+06	1.14725e+06	764271	339857	340801	710572	318363	1.57108e+06	1.71181e+06	578421	385077	487100	483420	428181	533243	146081	594756	570122	520434	1.95969e+06	431967	133031	342463	405041	0	759871	486623	660802	992967	565123	171122	1.18993e+06	1.50799e+06	1.64384e+06	266991	77405.9	759532	195698
1-Methylurate	Xenobiotics	Xanthine Metabolism	HMDB0003099	Meta_409	0.936	181.038	[M-H]-	Negative_FA	7.25	259825	450458	1.81652e+06	402517	749598	389336	301057	49247	67552.1	1.4927e+06	495045	154512	646365	612486	833063	722907	358460	363057	834101	449942	343801	761057	956471	0	349295	21817.4	109045	842222	328229	457703	71217.4	126659	433924	147744	1.03987e+06	1.08977e+06	292515	56789	316866	154769
Leu-Gly-Gly	Peptide	Small peptide		Meta_151	1.022	246.145	[M+H]+	Positive	3.7	281314	436621	83708.9	523700	548700	104981	0	0	119679	113282	1.45647e+06	210294	270606	227269	199886	310254	835091	0	67100.3	0	605457	1.51605e+06	236725	724067	0	193898	0	457290	0	0	170683	286518	50079	278075	966206	732570	49209.6	84886.1	736055	0
Phenylacetylglutamate	Peptide	Acetylated Peptides	HMDB0059772	Meta_178	4.624	266.104	[M+H]+	Positive	4.61	450310	436353	857376	1.04388e+06	0	0	154301	178679	0	928641	0	0	0	0	0	575691	0	318292	728930	447862	0	191939	0	0	0	0	0	0	0	0	33384.4	0	0	0	0	0	0	0	0	0
Gamma-Glutamylphenylalanine	Peptide	Gamma-glutamyl Amino Acid	HMDB0000594	Meta_198	3.868	295.128	[M+H]+	Positive	34604.1	1.79634e+06	433768	698528	741583	2.15894e+06	1.16748e+06	1.18091e+06	641598	143347	760154	2.34285e+06	3.04638e+06	993126	426661	471425	449732	297106	356864	773398	1.37037e+06	619054	1.44016e+06	621838	618629	267301	97219	119332	538102	221847	363767	292472	125931	233314	367101	1.42981e+06	1.11478e+06	182316	333760	2.12096e+06	238108
His-Ile	Peptide	Dipeptide	HMDB0028888	Meta_184	1.297	269.161	[M+H]+	Positive	6.89	528089	431392	415581	3.66495e+06	956933	295579	550269	162310	151077	457860	706540	397470	377297	340948	598239	515661	368587	188324	681309	297732	672802	865624	421697	35663.6	28196.9	517596	34544.5	295258	32380.7	168145	157199	422040	221634	326646	891887	1.10456e+06	185459	262669	1.12834e+06	188413
Aconitic Acid	Carbohydrate	Citrate cycle (TCA cycle)	HMDB0000072	Meta_283	0.804	173.009	[M-H]-	Negative_NH4HCO3	119.13	328353	396035	267198	1.14375e+06	1.15299e+06	3.37534e+06	2.79995e+06	2.14333e+06	1.22158e+06	227307	732022	5.4208e+06	1.97115e+06	619734	464075	298586	1.37665e+06	1.81382e+06	417776	918641	413935	838807	1.00378e+06	1.47824e+06	6.9621e+07	5.07987e+06	450083	1.17044e+06	910910	1.66546e+06	9.21407e+06	3.73703e+06	6.04517e+06	1.0275e+07	1.80763e+06	1.91316e+06	234245	716353	2.19028e+06	309841
Val-Phe	Peptide	Dipeptide	HMDB0029134	Meta_177	4.278	265.155	[M+H]+	Positive	5.89	500034	387794	96945	1.24887e+06	1.68921e+06	895450	37855.3	0	371104	236726	3.35042e+06	113527	318897	1.8325e+06	1.2083e+06	246367	1.16051e+06	0	297237	131057	1.66237e+06	3.38721e+06	484910	299725	0	196523	0	436849	38359.8	89932.9	181854	86690.4	297939	114932	1.72667e+06	834842	786571	123975	887276	1.23254e+06
Quinic Acid	Amino Acid	Shikimic acid pathway	HMDB0003072	Meta_103	0.852	193.062	[M+ACN+H]+	Positive	9.54	1.08899e+06	387048	885663	901925	972643	1.00451e+06	460878	1.37283e+06	769741	1.10494e+06	742670	404433	991589	305802	1.18878e+06	2.12294e+06	807224	251699	1.70859e+06	0	817088	546835	1.75766e+06	578584	1.22783e+06	165077	1.15068e+06	999869	622220	423331	570491	289657	2.80718e+06	465402	548490	1.2951e+06	2.21962e+06	801267	1.08519e+06	1.42617e+06
Cortisone	Lipid	Corticosteroids	HMDB0002802	Meta_217	5.902	361.201	[M+H]+	Positive	4.02	301933	365613	601921	779672	249495	484608	87998.9	0	223658	450367	450110	418804	321958	597020	566009	381849	202835	656617	606458	194415	605996	342231	421474	380104	57742.7	667918	81437.4	285847	228952	446089	301398	464050	125133	332825	777729	769623	278896	107003	306579	164644
Lys-Ile	Peptide	Dipeptide	HMDB0028954	Meta_168	1.394	260.197	[M+H]+	Positive	3.4	114310	357839	223424	432580	700829	363013	35181.5	0	137480	165483	669585	0	40795.7	595363	775148	430623	104590	0	490349	178390	219669	396942	128964	56776.8	0	0	0	104001	0	0	40505.6	0	0	0	449262	303051	264058	0	540721	276549
N-Methylisoleucine	Amino Acid	Leucine, Isoleucine and Valine Metabolism	HMDB0341355	Meta_57	3.017	146.118	[M+H]+	Positive	5.67	642402	353093	475689	1.27133e+06	839544	437934	604030	77106.7	442288	607727	373328	579627	256716	414924	378811	708463	1.06322e+06	295257	1.12444e+06	180647	660620	336545	203535	224226	243303	640572	63059.5	463260	408056	343739	45764.2	413830	246933	205806	488931	618974	777398	146430	123634	1.00155e+06
Methylmalonylcarnitine	Lipid	Fatty Acid Metabolism (Acyl Carnitine)	HMDB0062735	Meta_174	1.155	262.128	[M+H]+	Positive	7.41	775901	348661	1.99448e+06	1.78048e+06	2.25485e+06	2.05032e+06	703853	3.89465e+06	418845	2.02785e+06	2.30859e+06	1.10037e+06	1.73522e+06	665084	857588	7.29383e+06	568217	370509	9.42084e+06	469259	896495	2.50355e+06	807391	911411	1.72661e+06	1.3175e+06	29320.8	911265	402776	825367	3.20848e+06	981527	693238	3.85611e+06	2.68621e+06	2.76226e+06	1.99759e+06	310904	1.13936e+06	2.39779e+06
Ala-Ile	Peptide	Dipeptide	HMDB0028690	Meta_111	2.558	203.139	[M+H]+	Positive	6.02	124518	336376	143592	586823	708713	271288	98528.7	31491.3	114614	184119	1.04135e+06	0	267095	567876	570913	177484	143967	0	252271	39489.6	819472	1.22487e+06	179580	34002.2	0	0	36648.5	196626	0	0	27705	35120.3	199024	42948	594399	374303	328822	27504.2	759684	239651
N-Methylleucine	Amino Acid	Leucine, Isoleucine and Valine Metabolism		Meta_55	3.385	146.117	[M+H]+	Positive	6.95	178860	330131	667360	876426	701972	3.04805e+06	257144	878157	414824	517311	64443	2.89894e+06	695293	452405	297336	420702	333214	226609	466747	358167	259366	632822	228132	459226	478140	27007.2	136177	84569.2	368628	362532	850741	63244.2	1.27172e+06	1.27747e+06	367320	621336	718453	195994	227734	1.14692e+06
Riboflavin	Cofactors and Vitamins	Vitamin B2 Metabolism	HMDB0000244	Meta_221	4.194	377.146	[M+H]+	Positive	3741.98	170624	326816	1.653e+06	570144	513917	1.035e+06	241747	493151	287212	1.72662e+06	790615	81283.8	370139	641977	698756	766638	370858	224420	1.11688e+06	93627.2	1.20572e+06	178593	661816	563328	60708.3	270525	65445.3	584413	97217.8	163089	170310	146760	150502	114828	1.18335e+06	1.04506e+06	295423	407637	742274	276909
Citraconic Acid	Lipid	Fatty Acid, Dicarboxylate	HMDB0000634	Meta_250	0.823	129.018	[M-H]-	Negative_NH4HCO3	21.41	767245	317995	4.33206e+06	606379	2.24001e+06	2.59386e+06	2.42157e+06	2.48235e+06	560661	4.13702e+06	1.2849e+06	3.14857e+06	1.24707e+06	1.86769e+06	1.47625e+06	554268	1.14447e+06	818142	1.53559e+06	1.2115e+06	1.70485e+06	2.32219e+06	2.97145e+06	710308	2.29087e+07	1.6266e+06	278310	2.44839e+06	1.11185e+06	1.76201e+06	3.34776e+06	1.5234e+06	1.82369e+06	4.03452e+06	3.44755e+06	3.47631e+06	2.07483e+06	457381	1.68612e+06	2.0039e+06
2-Methylbutyrylcarnitine (C5)	Amino Acid	Leucine, Isoleucine and Valine Metabolism	HMDB0000378	Meta_153	3.918	246.17	[M+H]+	Positive	6.26	524947	317754	730887	2.17738e+06	398596	1.90637e+06	603211	912367	610689	769555	930922	2.93951e+06	2.71259e+06	723264	497185	1.82945e+06	1.13125e+06	960254	2.70582e+06	229716	827916	721580	346107	372010	375675	1.35298e+06	32164	383822	537857	523424	737727	1.00866e+06	602310	728961	1.02083e+06	861643	1.96749e+06	74906.3	557753	3.01883e+06
N6-Methyllysine	Amino Acid	Lysine Metabolism	HMDB0002038	Meta_72	0.883	161.129	[M+H]+	Positive	14.6	436063	313372	1.12764e+06	241744	898853	342015	369381	1.05164e+06	632388	1.06498e+06	1.15037e+06	654357	1.18707e+06	390547	469472	766545	231321	502375	1.15502e+06	192551	1.5567e+06	893256	309183	315912	497206	322942	73389.2	411602	96600.1	52996.3	1.17574e+06	649701	449886	1.04262e+06	514935	897312	1.36061e+06	140172	114491	1.91556e+06
Fumaric Acid	Carbohydrate	Citrate cycle (TCA cycle)	HMDB0000134	Meta_243	0.839	115.003	[M-H]-	Negative_NH4HCO3	32.12	236990	312265	514066	380913	234337	909254	411685	4.13224e+06	817388	385648	528514	1.86977e+07	354093	212084	197149	168851	475161	723027	409126	630416	128772	326138	353347	92746.1	9.25224e+07	102739	208407	310944	274245	372880	2.26697e+06	88441.9	532342	2.10333e+06	132111	172737	776806	18307.2	216828	123840
5-Hydroxyindole Sulfate	Amino Acid	Tryptophan Metabolism	HMDB0341278	Meta_419	3.377	212.002	[M-H]-	Negative_FA	6.54	419919	306173	502693	835585	792858	1.02899e+06	92912.3	0	40315.8	494272	471991	20129.9	732318	687561	801706	434900	28018.3	395782	726864	328827	790402	300901	283673	120272	16340.3	498515	0	234420	19747	71295.9	523370	303251	17363.6	543450	674987	766934	1.00397e+06	0	20226.4	1.36987e+06
Ser-Phe	Peptide	Dipeptide	HMDB0029046	Meta_160	1.76	253.118	[M+H]+	Positive	8.91	398119	306081	390399	625652	1.5075e+06	555542	178125	1.02995e+06	301211	323311	1.86178e+06	40293.2	156176	671730	266198	263811	500521	93532.4	389530	39179.8	2.57905e+06	1.05371e+06	174863	160431	31220.7	165698	28004.9	155506	37996.2	0	72964.7	95886.4	34263.2	92185.2	790990	296160	364987	26567.6	588207	468409
Ile-Lys	Peptide	Dipeptide	HMDB0028912	Meta_167	1.006	260.197	[M+H]+	Positive	12.56	578394	285388	0	467497	460036	0	0	0	236247	0	2.16473e+06	0	0	328366	179451	191008	522693	0	0	0	925415	1.6358e+06	108929	0	112112	0	0	204623	0	0	0	75075.1	78257	0	837407	215164	232853	0	509830	55732
Asp-Phe	Peptide	Dipeptide	HMDB0000706	Meta_191	3.495	281.113	[M+H]+	Positive	2.51	284169	276456	374378	667090	341643	1.26258e+06	36717.4	197095	218103	331206	526737	120854	209649	617239	561230	447954	70503.5	464588	663319	302543	1.09354e+06	322352	55717.2	218876	48367.4	258798	0	70386.1	36647.2	0	63818.8	102169	66072.7	122651	327857	313801	168737	33596.7	127028	186000
Citraconic acid	Unclassified	Unclassified		Meta_242	0.809	111.008	[M-H2O-H]-	Negative_NH4HCO3	45.16	247208	275040	33057.4	811698	892289	2.33977e+06	1.96613e+07	1.45009e+06	782676	103959	207389	2.82499e+06	1.63564e+06	115973	245411	128823	838241	1.23053e+06	68981.6	499273	272022	288844	509831	700891	4.39484e+07	3.93143e+06	692227	508604	590196	838240	1.03851e+07	3.23407e+06	3.54416e+06	1.11355e+07	672696	655077	66833.3	429063	1.55478e+06	47960
N-Acetyl-L-Tyrosine	Amino Acid	Tyrosine Metabolism	HMDB0000866	Meta_317	1.5	222.077	[M-H]-	Negative_NH4HCO3	18.66	203939	263359	388300	894449	797002	480409	89450	318641	48107.1	423298	296699	295996	453259	283703	355014	617023	261041	42977.8	879210	44793.2	139945	479284	258436	151546	221152	121212	0	329865	31346.8	65953.9	202336	105946	119963	271923	642917	625635	427993	41046.8	309434	551143
Glycerophosphoinositol	Lipid	Glycerolipid and Phospholipid Metabolism	HMDB0011649	Meta_364	0.884	333.06	[M-H]-	Negative_NH4HCO3	27.62	135512	262215	21170	371240	524971	164310	128786	1.27094e+06	210088	16327.7	242734	414517	433926	30288.6	54150	363193	230027	133604	424007	311752	175745	812189	49791	118810	1.05373e+06	77843.3	51040.3	19534.5	96035.3	150813	190014	129873	459594	277587	38902.5	23341.6	431319	69907.8	271629	426317
N1-Methyladenosine	Nucleotide	Purine Metabolism, Adenine containing	HMDB0003331	Meta_192	0.973	282.12	[M+H]+	Positive	6.75	153454	262212	980550	1.56534e+06	143337	686359	224609	2.1474e+06	426003	689858	899177	503664	1.96839e+06	385707	448220	0	307894	1.15919e+06	0	0	401404	540066	569559	874081	724736	289507	211591	742792	824381	1.01904e+06	365353	284712	287526	293852	1.47467e+06	1.47323e+06	233681	455829	213267	511202
Lactoylvaline	Peptide	Pseudodipeptides (N-Lactoyl-amino acids )	HMDB0062181	Meta_102	4.067	190.107	[M+H]+	Positive	20782.4	52300	258431	518172	359006	451198	1.31895e+06	450375	368636	447795	582371	713388	319925	1.01568e+06	123780	126214	1.69237e+06	207763	716477	1.85286e+06	464324	604372	155398	174482	488221	133092	0	82758	248118	80070.8	133235	198879	81618.3	175911	148309	566030	566219	828926	240658	119156	1.14548e+06
Myristoleic Acid (C14:1n5)	Lipid	Long Chain Fatty Acid	HMDB0002000	Meta_319	7.729	225.186	[M-H]-	Negative_NH4HCO3	18.87	281809	253299	360813	460181	831284	396355	627392	781297	200510	307573	355262	315144	354158	187442	288854	1.57277e+06	283745	470388	2.05654e+06	992886	913902	291554	267547	342953	467649	218391	224607	227340	138669	251535	365369	242261	144155	389481	342658	299703	344589	242023	482344	231485
Deoxyguanosine	Nucleotide	Purine Metabolism, Guanine containing	HMDB0000085	Meta_337	0.895	266.005	[M-H]-	Negative_NH4HCO3	30.04	327828	237766	968829	147444	386621	340147	174683	4.33779e+06	89239.5	1.12956e+06	350471	286115	168295	616812	388116	226668	188822	135025	219812	363107	327342	343306	360764	73802.6	102649	60893.6	0	384496	154894	223441	91709.5	84568.4	221259	153489	344599	281855	0	90957	280978	15993.7
Aminoadipic Acid	Amino Acid	Lysine Metabolism	HMDB0000510	Meta_272	0.895	160.061	[M-H]-	Negative_NH4HCO3	25.53	159297	235371	778065	597997	216347	280792	99246.2	122860	79991.2	967681	274889	108760	447653	392321	318620	566950	75469.9	259085	649088	70148.2	304022	256515	102796	10590.9	251347	123986	10165.8	67791	59699.9	66609.9	353936	64132.5	145223	135470	118345	54359.1	395823	25321	401431	423599
Pentadecenoic Acid (C15:1n5)	Lipid	Long Chain Fatty Acid	HMDB0302623	Meta_323	7.83	239.201	[M-H]-	Negative_NH4HCO3	23.85	177234	233310	332031	491976	599029	437670	392822	588484	211792	394200	274796	259329	308485	308596	173584	1.4761e+06	234016	465939	1.8807e+06	839226	730260	330566	258141	315846	234580	223185	198596	221676	177951	263795	273404	117729	181964	295625	171265	149538	216151	258445	322437	233027
P-Coumaraldehyde	Xenobiotics	Natural Product/Food/Plant	HMDB0037254	Meta_262	2.46	147.044	[M-H]-	Negative_NH4HCO3	7.26	308365	228843	981872	779063	772600	564281	184736	132623	137583	1.17433e+06	472254	186093	288681	421907	315528	516859	101895	141069	762279	223175	692832	268432	437114	216973	403874	231014	0	400755	59216.5	161961	169480	173218	25295.9	221258	909943	915517	213386	59892.1	292190	241351
C-Glycosyltryptophan	Amino Acid	Tryptophan Metabolism	HMDB0240296	Meta_220	1.833	367.15	[M+H]+	Positive	52342.4	322800	227731	388922	899886	824455	719977	226718	72299.4	357288	458590	430840	349390	414590	155064	179358	788234	372195	370978	964962	254993	736567	668005	234594	274806	90632.3	393755	0	226829	134690	102538	235341	237018	248386	269628	394180	438231	469209	35403.8	260685	503572
Glycerophosphoglycerol	Lipid	Glycerolipid and Phospholipid Metabolism	HMDB0240316	Meta_328	0.894	245.042	[M-H]-	Negative_NH4HCO3	22.59	169444	212642	102987	252970	642184	217000	158972	1.66878e+06	236267	187401	405400	356465	314549	170378	145331	303940	262739	253425	382799	404735	380080	509654	185236	212615	638692	116154	58580.5	135426	75874.7	85584.1	148571	125585	190277	143161	521435	362504	351732	186606	321531	295865
Phosphoserine	Amino Acid	Glycine, Serine and Threonine Metabolism	HMDB0000272	Meta_290	0.849	184.001	[M-H]-	Negative_NH4HCO3	31.78	193469	204705	714057	137121	518514	306434	22626.5	116203	220744	777340	1.35324e+06	39466.8	79263	1.20478e+06	885621	92024.1	51357.1	23361.5	195103	59984.1	765253	278913	47138.4	99855.6	156153	25651.7	0	63285.4	402959	639386	123206	17484	447703	213947	137257	154202	19403.9	0	17334	6269
N-Acetyltryptophan	Amino Acid	Tryptophan Metabolism	HMDB0013713	Meta_425	5.211	245.093	[M-H]-	Negative_FA	12.77	139851	202518	371598	189185	264864	324632	34650.1	93606	154721	433784	252573	174598	594201	158273	180742	282661	170089	56272.5	431353	25723.9	168872	71729.5	252604	113920	19395.1	28781.8	0	245541	0	0	50490.7	55093.1	25854.9	88121.8	563384	641948	245819	26883.6	87265.8	405758
dGDP	Nucleotide	Purine Metabolism, Guanine containing	HMDB0000960	Meta_374	0.913	426.014	[M-H]-	Negative_NH4HCO3	15.33	66130	199797	141163	139274	53300.9	104052	110860	35496.5	34835.2	148654	48185.4	203865	98384.3	52715.4	22896	182517	179561	155908	224985	151099	258929	193011	146208	11313.2	27337.5	57228.3	24689.6	120216	67189.8	93308	49775.6	49872.7	158516	85682.5	65362	95286.6	46644.9	64275.9	80825	33733.2
3-Sulfo-L-Alanine	Amino Acid	Methionine, Cysteine, SAM and Taurine Metabolism	HMDB0002757	Meta_278	0.88	167.997	[M-H]-	Negative_NH4HCO3	38.15	290735	198096	275516	263890	1.17285e+06	906474	188435	129168	430315	369159	472978	1.162e+06	787622	71489.5	136772	530115	359421	193865	505160	243773	546483	386346	82251.8	226520	375744	246847	0	31638	408024	562340	301655	246242	404522	344437	150886	119304	92733.1	119118	501376	142030
Tyrosine O-sulfate	Amino Acid	Tyrosine Metabolism	HMDB0155722	Meta_430	1.225	260.024	[M-H]-	Negative_FA	35056	270844	198047	599137	507689	206069	352910	0	148326	0	426285	802807	0	254716	358438	741838	684487	213734	3.77192e+06	658342	271934	1.17374e+06	827394	316007	62070.8	229845	72963.8	0	712356	0	23868.3	145569	63870.3	213852	109426	587578	851463	392862	133449	229878	330452
15-HEPE	Lipid	Eicosanoid	HMDB0010209	Meta_359	7.623	317.212	[M-H]-	Negative_NH4HCO3	35.72	357761	193434	1.92686e+06	1.84164e+06	1.80749e+06	714677	106331	614102	692199	1.81277e+06	2.05158e+06	165061	457761	368207	379923	1.09641e+06	607246	207112	1.39888e+06	511080	3.50825e+06	1.39581e+06	246663	379306	472363	31634	0	275494	289278	358527	123558	115169	145173	161549	561696	589977	570016	112243	447088	326880
Homostachydrine	Xenobiotics	Natural Product/Food/Plant	HMDB0004827	Meta_69	1.036	158.118	[M+H]+	Positive	3.99	277967	191784	169793	782120	300834	848024	447353	853463	581003	387497	755887	381307	774836	464909	737248	283503	254526	697714	434165	378492	601562	576289	308579	288467	188845	323011	473944	594386	409151	175278	463672	307392	240649	318583	781329	636274	456093	306176	769443	1.01525e+06
Alpha/Gamma-Linolenic Acid (C18:3n3 or n6)	Lipid	Long Chain Fatty Acid	HMDB0001388	Meta_341	7.872	277.217	[M-H]-	Negative_NH4HCO3	89.43	498579	190030	386813	980745	2.41417e+06	288468	719600	2.56232e+06	130748	367336	205458	838587	506773	86670.6	125083	964850	1.72457e+06	350238	1.23753e+06	566625	1.67336e+06	1.63504e+06	875088	927851	4.09674e+06	472773	25655.9	1.00811e+06	782915	1.49969e+06	922857	371390	619563	1.12245e+06	1.98439e+06	2.07655e+06	769206	369400	3.03375e+06	318032
Homovanillic Acid	Amino Acid	Tyrosine Metabolism	HMDB0000118	Meta_410	4.081	181.048	[M-H]-	Negative_FA	7.32	150140	188299	91323.9	1.01688e+06	185297	267195	154790	215279	258673	118725	158192	150454	275961	127480	66862	459526	114339	274829	560691	202078	34005.3	0	94592.4	132679	31665.6	37089.3	93505.2	81981.8	71942.5	107593	213277	66568.5	47460.3	188680	135851	238384	239648	35117.7	78705.8	290880
Indolelactate	Amino Acid	Tryptophan Metabolism	HMDB0000671	Meta_118	5.183	206.081	[M+H]+	Positive	5.76	82687.6	183376	1.22381e+06	181465	1.1937e+06	1.02117e+06	0	204798	167637	1.34435e+06	173844	309049	386574	264830	354009	448093	102599	304913	669138	170884	923626	0	213217	135005	160609	61446.5	0	130320	45623.4	0	107714	0	0	59597.9	281374	526091	618839	0	191560	675043
Cysteine sulfinic Acid	Amino Acid	Methionine, Cysteine, SAM and Taurine Metabolism	HMDB0000996	Meta_265	0.892	152.002	[M-H]-	Negative_NH4HCO3	15.74	202268	182971	373415	436995	151287	309568	75886.4	169615	274407	451153	311627	270910	157659	398817	339350	230694	145015	296970	281947	113760	372332	264413	117501	69271	25883.6	90013	0	156239	26747.8	38656.4	21344.9	35786.6	11569.6	14371.1	180185	86076.7	170133	83272.6	17545.3	211133
3-Hydroxyisovalerylcarnitine	Amino Acid	Leucine, Isoleucine and Valine Metabolism	HMDB0062555	Meta_175	1.541	262.165	[M+H]+	Positive	5.74	105174	181877	632847	2.14192e+06	186653	725436	0	302531	263504	486023	1.17926e+06	139336	911820	170454	45685.7	754007	290371	87830	958065	34794.8	931479	583056	233999	225618	153176	383766	0	88529	59756.3	174768	447116	292051	142694	372160	494579	525647	1.20728e+06	0	208948	1.79193e+06
Hexanoylcarnitine	Lipid	Fatty Acid Metabolism (Acyl Carnitine)	HMDB0000756	Meta_165	5.304	260.185	[M+H]+	Positive	14095.7	276952	181443	568229	851646	455813	1.25573e+06	244789	371625	615805	483827	466654	683574	1.81937e+06	204449	305059	501024	482678	608449	792989	108233	913049	756050	190660	457785	202678	1.07421e+06	43416	195653	314587	465516	1.11184e+06	706563	329903	896051	433253	419560	1.07972e+06	111682	619364	1.45705e+06
Glucuronate	Carbohydrate	Amino sugar and Nucleotide sugar Metabolism	HMDB0000127	Meta_299	0.898	193.035	[M-H]-	Negative_NH4HCO3	27.45	204590	174332	535457	266116	402566	461524	145801	1.26687e+06	326418	659057	292507	1.71488e+06	639913	320578	316189	370197	140260	219410	342442	248431	1.31597e+06	340342	364513	34389.1	775212	258068	52915.4	338911	116639	180174	379670	187110	142993	379366	410220	375768	117832	51795.2	271911	58675.5
Eicosenoic Acid (C20:1)	Lipid	Long Chain Fatty Acid	HMDB0062436	Meta_357	8.416	309.28	[M-H]-	Negative_NH4HCO3	14.68	196162	162673	288899	695986	224727	170192	175291	199131	153812	406825	168855	97872.5	131344	176985	94585.5	391527	163858	149705	372717	217213	2.52423e+06	232571	211424	207774	149631	293347	140247	169546	101574	131779	177616	205622	115364	232833	149457	158493	124675	110586	517729	135607
Fructose 1,6-Bisphosphate	Carbohydrate	Glycolysis, Gluconeogenesis, and Pyruvate Metabolism	HMDB0001058	Meta_365	0.782	338.989	[M-H]-	Negative_NH4HCO3	29.23	513651	161937	408956	1.03723e+06	1.02332e+06	952163	383364	131123	477778	371383	536227	336509	404001	188428	83574.5	468023	825730	293737	518792	242972	647106	1.00671e+06	303624	635888	336985	173292	0	339210	267346	359558	245350	152620	363268	221285	617320	493241	719264	296243	700395	422083
Fructoselysine	Xenobiotics	Natural Product/Food/Plant	HMDB0252495	Meta_205	0.764	309.166	[M+H]+	Positive	10.37	175511	156723	44594.6	34491.8	450837	460660	627283	1046321	329348	0	412700	2.28353e+06	747511	394722	75463	60300	709932	919745	0	378307	288386	215337	27486.7	1.32782e+06	160659	14888278	417876	70505.8	139578	589332	18779774	8735348	139833	31313690	168319	0	0	629821	294416	99924
dCMP	Nucleotide	Pyrimidine Metabolism, Cytidine containing	HMDB0001202	Meta_353	1.246	306.058	[M-H]-	Negative_NH4HCO3	12.69	142504	154460	16936.6	1.16184e+06	26981.1	44888.2	77967.6	17907.8	36590.2	15427.7	57106	0	10556	90630.3	126080	0	109021	26109.2	10426.7	48832	31618.4	213330	241212	103651	0	78104	0	262601	211401	269874	114989	166704	185507	53642.5	74342.2	203918	0	45822.9	499662	0
Perfluorooctanoic Acid (PFOA)	Xenobiotics	Chemical		Meta_373	7.429	412.967	[M-H]-	Negative_NH4HCO3	18.03	209607	151916	205198	151792	182471	179488	172473	150461	93454.8	190264	162122	142074	193087	175711	181283	202957	164446	210073	174746	197372	135314	186769	226651	165204	202726	157043	239883	144096	163647	211271	216221	179973	152202	208862	168367	181509	207509	181668	168964	212401
2-Hydroxymyristate	Lipid	Fatty Acid, Monohydroxy	HMDB0002261	Meta_327	7.738	243.196	[M-H]-	Negative_NH4HCO3	12.23	191178	151529	303971	293181	313698	309272	182321	255444	248956	243347	266750	273830	257259	236273	242203	315321	263742	348078	321493	236650	367398	227186	221603	169930	302220	266715	237380	231342	195936	248147	246262	249571	216659	326698	289494	251849	248381	259666	309597	149908
Lactoylleucine	Peptide	Pseudodipeptides (N-Lactoyl-amino acids )	HMDB0062176	Meta_115	5.16	204.123	[M+H]+	Positive	32703.6	0	150097	191397	196434	416797	1.59523e+06	381916	369945	254158	412500	696127	311213	863956	41898.1	0	1.64796e+06	174980	460156	2.32818e+06	537190	674255	0	74559.5	317520	51796.7	0	90048.5	239361	0	0	0	0	126985	49196.9	287849	428733	741238	110794	0	716788
2,5-Dihydroxybenzenesulfonate	Xenobiotics	Chemical	HMDB0245498	Meta_296	0.957	188.981	[M-H]-	Negative_NH4HCO3	32.91	96640.3	141212	159563	126867	610838	2.03192e+06	75767.5	671427	382310	218408	96140.8	3.67396e+06	1.05492e+06	36998.7	73030.5	276467	51984.5	436931	326813	225493	133679	257429	45369.5	108528	5.03567e+06	239409	33817.8	113725	51009.2	165138	400392	219402	447496	488223	387120	317950	301563	142573	30722	246462
1-Naphthalenesulfonate	Xenobiotics	Chemical	HMDB0243955	Meta_312	5.757	207.012	[M-H]-	Negative_NH4HCO3	8.53	175826	128260	575196	941894	70551.4	16338.9	116826	71434.2	23076.5	540939	40691.5	14988.2	364920	16036.2	27252.6	78024	55750.7	12314.2	25597.9	97595.4	36238.5	15943.4	48407.8	8519.95	0	9564.79	10981.1	0	14094.8	12267.7	35570.6	13270.5	0	130979	19928.9	9324.21	21852.6	14249.5	10838.8	11284.9
Pyridoxal 5'-Phosphate	Cofactors and Vitamins	Vitamin B6 Metabolism	HMDB0001491	Meta_156	0.964	248.035	[M+H]+	Positive	8.1	164644	121634	124289	310706	0	184751	98828.6	0	0	84185.2	447665	658953	354714	0	100314	374673	0	96615.1	0	76780.8	83150.7	109541	66649.5	0	0	0	0	0	75098.3	0	0	0	0	61224	147272	214315	87744.4	0	0	1.08762e+06
6-Phosphogluconic Acid	Carbohydrate	Pentose phosphate pathway	HMDB0001316	Meta_340	0.803	275.022	[M-H]-	Negative_NH4HCO3	64.36	648221	119138	28653.4	466449	1.90946e+06	1.36313e+06	339672	455404	418984	44504.1	903004	2.47146e+06	1.50755e+06	120415	112808	100285	635431	84378.2	158822	273478	267308	749133	259005	115737	6.94269e+06	162348	0	278292	379794	525001	610039	22074.6	301119	733339	674946	622070	0	92732.7	793758	14180.7
Heme	Cofactors and Vitamins	Hemoglobin and Porphyrin Metabolism	HMDB0003178	Meta_227	6.587	616.177	[M+H]+	Positive	562030	406104	115428	1.34024e+06	2.60921e+06	1.83477e+06	290517	0	628921	0	1.10153e+06	0	0	91242.4	107884	297324	3.34741e+06	556019	0	4.08776e+06	775027	5.99261e+06	1.49382e+06	0	233985	0	151582	0	0	0	236360	0	176498	0	0	0	70396.6	0	0	664484	0
Pro-Hydroxy-Pro	Amino Acid	Urea cycle; Arginine and Proline Metabolism	HMDB0006695	Meta_134	0.774	229.121	[M+2H]2+	Positive	5.55	336575	111976	592544	982558	2.007e+06	692665	1.11062e+06	1.04436e+06	369229	660071	664854	3.14529e+06	975967	539861	334529	382524	230652	519523	370416	688256	874162	2.30598e+06	710031	1.35384e+06	678211	3.28e+06	403506	861950	788753	1.66426e+06	2.74565e+06	3.09541e+06	232947	4.03963e+06	1.29572e+06	1.37934e+06	63191.4	525307	2.56938e+06	51017.6
Phosphothreonine	Amino Acid	Glycine, Serine and Threonine Metabolism	HMDB0011185	Meta_302	0.984	198.017	[M-H]-	Negative_NH4HCO3	12.74	10509.8	111626	106250	10400.3	144592	13394.6	0	0	16470.4	22175	155203	40901.1	52363.1	0	10521.8	54439.3	42827.1	0	97743.9	7293.09	36461.3	300744	19692.5	0	0	10527.1	10089.7	29210.4	10162.8	12035.1	134630	0	9419.71	115882	137789	194315	39762	0	118073	45121.8
Phosphotyrosine	Amino Acid	Tyrosine Metabolism	HMDB0006049	Meta_334	0.843	260.026	[M-H]-	Negative_NH4HCO3	28.23	282561	110514	155495	652885	359469	266282	135137	1.17909e+06	139924	89280.7	311308	925115	473078	0	79456.5	57369.8	822770	36927.9	57982.2	105453	261203	950046	163606	163129	1.06012e+06	0	8229.62	160981	249698	438871	296652	25099.4	391424	499699	238925	197440	231258	19991.5	184053	571768
Daidzein	Xenobiotics	Natural Product/Food/Plant	HMDB0003312	Meta_161	5.697	255.065	[M+H]+	Positive	25.68	834647	109744	64871.2	65055	403356	321095	0	212455	392291	67102.7	131823	0	250877	0	100519	392335	106550	290724	250703	95241.8	63167.3	204185	65924.4	156928	135286	0	83113	62132.4	7.77911e+06	9.94289e+06	89605.6	0	181206	0	0	0	147862	52879.1	0	139244
Allantoin	Nucleotide	Purine Metabolism, (Hypo)Xanthine/Inosine containing	HMDB0000462	Meta_269	0.944	157.036	[M-H]-	Negative_NH4HCO3	14.01	113257	97864	69911.9	180084	225332	177317	165870	123715	58801.9	24794.2	212558	49942.6	80446.1	50145.4	10138.5	175766	88732.9	85067.7	264357	125277	313192	29556.5	44875.7	57714	99503.9	240569	45768.3	26157.7	114056	127559	23806.9	196747	505036	27229.2	88333.9	59124.9	10716.9	73661.9	225058	8558.02
Phenol Glucuronide	Amino Acid	Tyrosine Metabolism	HMDB0060014	Meta_431	3.66	269.067	[M-H]-	Negative_FA	2933.85	167748	94135.8	841896	235287	329605	514260	207497	188988	252926	810797	167525	587900	774434	214659	197344	436227	110046	112960	556153	230528	319853	301437	58735.6	181746	286441	744563	0	100252	203494	216259	345423	611180	266164	496350	198378	137135	668236	105119	203548	882186
3-Hydroxydecanoate	Lipid	Fatty Acid, Monohydroxy	HMDB0002203	Meta_295	7.285	187.133	[M-H]-	Negative_NH4HCO3	13.11	108797	87726.6	94372.4	195292	95992.2	61943.7	90682.7	83061.9	68982.3	77238.6	84281.2	116216	144597	130214	85955.5	163206	106883	107083	257644	80872.4	71884.4	47037.1	104036	35034.3	134610	121803	52002.9	60610	85227.1	89085	91981.7	74430.1	63901.3	108872	42893.3	27227.2	133563	50395.3	30888.5	156876
Isobutyrylcarnitine (C4)	Amino Acid	Leucine, Isoleucine and Valine Metabolism	HMDB0000736	Meta_140	2.58	232.154	[M+H]+	Positive	5.57	368255	82292.6	625760	1.22989e+06	206434	1.06417e+06	336268	714617	523309	608262	420107	612678	1.46208e+06	329492	411147	662568	717940	495726	842526	169614	455110	209914	100723	241105	223691	767898	64370.8	158271	263360	403736	575647	724019	306799	550747	538583	560263	1.33532e+06	133762	417357	1.99074e+06
Beta-Citrylglutamate	Amino Acid	Alanine, Aspartate and Glutamate Metabolism	HMDB0013220	Meta_360	0.766	320.063	[M-H]-	Negative_NH4HCO3	3345.69	87421.9	75752	138322	557608	172578	282404	119874	39542.3	110666	259933	216551	336503	365559	31899	79884.3	194435	168871	57710	326233	111846	363453	263697	86934.9	332069	466268	394269	0	35537.7	183596	245522	285624	314644	116695	391926	288182	288380	242683	159567	300106	373938
Pseudouridine	Nucleotide	Pyrimidine Metabolism, Uracil containing	HMDB0000767	Meta_326	0.861	243.062	[M-H]-	Negative_NH4HCO3	17.57	111245	69716.4	2.96768e+06	656813	1.27694e+06	653383	284962	68394	238170	3.27242e+06	942657	401692	556281	120529	311267	579939	278631	619023	497974	322380	497244	271900	139491	1.13814e+06	1.54018e+06	1.33628e+06	0	192239	445405	795667	1.29979e+06	1.25826e+06	342298	1.52049e+06	433138	356428	235892	592421	2.11268e+06	301581
Biliverdin	Cofactors and Vitamins	Hemoglobin and Porphyrin Metabolism	HMDB0001008	Meta_225	5.183	583.293	[M+H]+	Positive	128416	201412	68216.6	318176	590397	0	110739	109649	106657	50607.5	503525	49923.6	0	42006.7	0	0	194670	0	105803	224055	115033	138656	47408.3	0	0	0	0	0	0	41309.4	0	0	0	0	0	0	0	0	0	95154.2	0
Carnosine	Peptide	Hybrid peptide	HMDB0000033	Meta_132	0.959	227.125	[M+H]+	Positive	21.5	142399	59333.3	331961	492587	1.29145e+06	0	94093.6	3.86848e+06	176817	284387	904773	1.29236e+06	54217.3	6409.54	47182.6	72385.3	147293	0	1.40954e+06	0	667838	364967	4088.06	20752.9	109957	1448.53	67941.3	7570	0	531523	121638	65614.7	59998.9	123242	231861	245188	438867	1163.29	141890	1.1686e+06
8-Hydroxyoctanoate	Lipid	Fatty Acid, Monohydroxy	HMDB0061914	Meta_271	6.038	159.102	[M-H]-	Negative_NH4HCO3	7.77	10757.7	58097.9	57647.6	31498.5	59624.9	24148.1	10431.9	20886.8	9817.91	107035	23858	32589.8	86811.1	37389.1	14028	65660.7	93629.8	41857.2	93213.8	13656.5	105311	24001.9	12218.5	49430.1	119271	143308	0	21064.6	0	0	21775.2	73152	0	13290	8804.52	71013.2	32586.6	0	15741.1	28221.1
1,3-Diphopshateglycerate/2,3-Diphopshateglycerate	Carbohydrate	Glycolysis, Gluconeogenesis, and Pyruvate Metabolism	HMDB0001294	Meta_335	0.816	264.952	[M-H]-	Negative_NH4HCO3	6.02	247408	56180.8	13166.3	341482	348402	67520.7	15272	0	112356	23337.6	494989	32740.3	161799	38965.9	0	23812.9	574658	10570.3	9235.92	9781.92	379975	38780.1	17008.4	104226	0	10929.7	0	24691.1	0	0	26637.3	35576.8	0	40328.6	85465.3	0	29035.2	32887.9	103008	67689.3
Xanthosine	Nucleotide	Purine Metabolism, (Hypo)Xanthine/Inosine containing	HMDB0000299	Meta_194	1.326	285.083	[M+H]+	Positive	4.7	313108	56087.9	0	475698	0	575307	41021.6	308862	111633	0	217291	140421	286324	244025	261285	38716	65324.4	49105.2	42686.7	85504.6	222211	0	148868	0	0	57316.8	0	197431	133408	195607	131608	0	0	59296.6	399432	514618	0	31183	206429	47777.9
N-Acetylhistidine	Amino Acid	Histidine Metabolism	HMDB0032055	Meta_415	0.984	196.072	[M-H]-	Negative_FA	7.96	175457	54741.3	260512	247089	436491	466637	85638.2	703302	354094	135380	218257	70706.2	217884	108459	60091.6	61315.4	166256	41183	43681.9	249259	190208	667909	589561	0	60675.7	41696.6	0	673927	94360.3	151294	270263	0	832217	191688	1.41515e+06	1.41926e+06	877561	0	238412	1.05557e+06
dUDP	Nucleotide	Pyrimidine Metabolism, Uracil containing	HMDB0001000	Meta_369	0.841	387.01	[M-H]-	Negative_NH4HCO3	14.91	150160	54021	33802.4	296113	154144	150869	38231.5	143218	13212.6	51599.5	105189	78707	198036	47804.1	120560	0	288614	14216.6	19558.5	16042.9	61909.7	193463	66180.1	0	102908	12823.9	0	70440.6	63072.4	117070	162849	36764.3	223237	68093.5	238138	229973	0	0	66346.3	31115.1
N-Formylmethionine	Amino Acid	Methionine, Cysteine, SAM and Taurine Metabolism	HMDB0001015	Meta_285	1.414	176.038	[M-H]-	Negative_NH4HCO3	16.57	100179	52411.4	937433	183906	102309	93999.3	16604.4	38018.1	19659.6	976037	232871	0	70478.4	411064	395171	99366.4	15887.1	87671	155085	14998.8	584894	23845.7	85835	0	0	6997.37	0	140495	8582.33	34228.3	0	8431.38	0	0	383587	367260	0	0	61193.5	0
Sucrose	Carbohydrate	Polysaccharides and Oligosaccharides	HMDB0000258	Meta_367	0.979	341.109	[M-H]-	Negative_NH4HCO3	2618.5	57069.8	48474	0	0	16544.9	3.79296e+06	10900.1	853321709	325048	0	0	1.39384e+07	380920	22123.6	0	8073.49	17647.6	8.15521e+06	0	36626.3	10550.2	9692.46	12053.7	11029.5	1297782479	19512.9	316972	75399.7	105962	189366	280366	0	298100	315009	0	13697.8	28308.7	9079.84	199406	15374.9
Eicosadienoic Acid (C20:2n6)	Lipid	Long Chain Fatty Acid	HMDB0005060	Meta_354	8.235	307.265	[M-H]-	Negative_NH4HCO3	18.66	113530	42750.8	268715	708564	141467	54424.2	110253	34358.7	23425.9	232382	19346.3	17505.5	60431.1	48939.1	23110.8	276127	42755.4	36024.5	221489	47736.4	2.61004e+06	348801	60069.3	76116.9	67830.2	28051.6	30244.7	38571.1	38049.2	48172.7	10776	74871.9	48861.4	41104.3	39419.5	13530.6	20695.3	24909.4	604925	22610.7
His-Trp	Peptide	Dipeptide	HMDB0028896	Meta_213	2.535	342.152	[M+H]+	Positive	6.26	81804.5	40383.1	1.02e+06	591598	1.43779e+06	0	187573	232532	104302	1178690	668188	777866	1.64627e+06	173894	131776	0	427282	151731	198969	520236	410834	653485	242299	303306	202673	383179	68689.7	190777	327068	993372	917226	500034	65828.3	1.15329e+06	298917	239378	478965	28476.2	732333	505755
1-Carboxyethylisoleucine	Amino Acid	Leucine, Isoleucine and Valine Metabolism	HMDB0242158	Meta_306	4.065	202.108	[M-H]-	Negative_NH4HCO3	19.9	10895.8	38324.4	101278	180651	268244	710763	164696	11842.1	78099.5	194199	266746	78154	714144	22446.8	22618.8	918762	38482.5	246294	1.5187e+06	164873	230438	23735.6	39396	82212.3	472105	0	12736.7	59927.3	7582.46	10449.7	63630.4	10149.8	30494.6	111838	228077	254738	242519	33638.1	13750.8	271349
Gamma-Glutamyltyrosine	Peptide	Gamma-glutamyl Amino Acid	HMDB0011741	Meta_207	1.966	311.124	[M+H]+	Positive	6.3	752949	37378.1	94996.2	52378.5	1.09775e+06	402984	427510	267230	33763.2	172765	1.34545e+06	677866	417261	0	0	72670	0	120839	136508	605971	165147	1.13648e+06	0	329576	100518	0	0	0	0	33217.5	78411.5	0	0	148177	0	27974.9	0	152045	1.16387e+06	66168.3
Alpha-Ketoglutaramate	Amino Acid	Alanine, Aspartate and Glutamate Metabolism	HMDB0001552	Meta_259	0.919	144.038	[M-H2O-H]-	Negative_NH4HCO3	12.57	95737.4	36687.8	74867.3	36608.8	24560.2	70826.7	42018.9	1.45687e+06	60184.8	84420.2	41414.3	75835.4	10624.1	90528.9	46043.8	6427.54	27658.2	41334.6	15442.1	97506.2	45215.2	79218.6	217366	12281.5	830192	7906.04	32845	182195	45827.5	65603.4	61657.6	19132	91854.1	33647	59489.2	65615.3	14039.2	7534.48	102438	7671.51
3-Ureidopropionate	Nucleotide	Pyrimidine Metabolism, Uracil containing	HMDB0000026	Meta_252	0.908	131.045	[M-H]-	Negative_NH4HCO3	11.25	52775.6	35900.2	389902	93436.5	84364.5	66271.4	5614.88	44975.4	60339.9	462005	121125	454467	18147.3	444004	255459	61938.7	19093.5	72150.7	73122.4	39796.6	213735	86974.1	341603	8759.64	377298	119779	9160.7	278152	50369.8	90351.7	27904.9	118575	16032.5	73465.6	311650	315534	10812.4	23054.9	145645	14068.1
Docosahexaenoic Acid (C22:6n3 DHA)	Lipid	Long Chain Fatty Acid	HMDB0002183	Meta_363	7.973	327.233	[M-H]-	Negative_NH4HCO3	70.25	380826	33486	502885	807085	428444	234434	170064	130518	27067.1	496871	28755.2	10685.3	79371	50305.1	76687.4	466710	361073	92378.9	445026	250076	1.19296e+07	580110	50555.4	344681	35744.7	377112	67647.2	58876	29982.4	110489	88696.7	213805	13210.1	214451	99517.8	196766	32658.8	59561.4	2.32182e+06	69844.7
2-Methylcitrate/Homocitrate	Carbohydrate	Citrate cycle (TCA cycle)	HMDB0003518	Meta_309	0.8	205.035	[M-H]-	Negative_NH4HCO3	17.75	236696	32580.8	152084	447185	545528	255844	179745	459166	471796	202518	1.06706e+06	818367	126421	676997	698141	204351	387939	196929	368760	14317.6	540700	219629	277994	225474	372884	352002	0	366916	453651	739581	243057	279813	266478	183618	707720	775867	831403	124441	1.39501e+06	1.32625e+06
2,3-Dihydroxybenzoate	Xenobiotics	Benzoate Metabolism	HMDB0000397	Meta_266	3.987	153.018	[M-H]-	Negative_NH4HCO3	9.38	57403.1	32010.5	9208.67	73991.6	390417	108819	11443.3	189708	105830	9699.62	47384.5	164960	399146	65848.3	62618.8	394275	98942	208279	662334	83346.6	115114	101655	91569.3	252408	290871	86644.2	21837.6	34083.6	124584	305579	25520.2	42617.6	11470.8	10427.5	177695	139738	164568	103176	18741	342132
CTP	Nucleotide	Pyrimidine Metabolism, Cytidine containing	HMDB0000082	Meta_375	0.893	481.976	[M-H]-	Negative_NH4HCO3	5.95	7255.09	29100.4	33898	10309.5	0	7569.43	23358.5	0	0	25765.4	0	20302.7	0	0	0	25814.6	46869.6	17739.3	66114.5	9264.56	81428.9	34116.6	0	0	0	0	0	0	0	0	0	0	20698.8	0	8729.12	0	12363.4	0	36294.3	0
Perseitol	Xenobiotics	Natural Product/Food/Plant	HMDB0033750	Meta_314	0.953	211.083	[M-H]-	Negative_NH4HCO3	10.39	34894.1	28447.6	151650	210016	141397	12965.3	32452.3	90118.9	13320.9	152525	337136	31187.1	31308.5	103231	53841.6	58272.4	49894.8	6739.91	51821.3	22493.2	35497.3	494793	101952	11971.1	115972	8736.29	0	59510	25759.9	41135.8	34708.9	19754.9	8770.17	49784.1	258169	233422	16280.6	0	79626.4	10796.7
Eicosatrienoic Acid (C20:3n3)	Lipid	Long Chain Fatty Acid	HMDB0002925	Meta_352	8.073	305.248	[M-H]-	Negative_NH4HCO3	90.77	339720	28149.3	650837	1.67811e+06	374750	181226	130613	10785.4	27166.4	595516	83322.8	22798.5	81142.7	14958.9	12970.1	940475	383160	12369	772535	416485	1.27623e+07	990874	15275.5	484363	12200.4	289122	0	0	10615.1	13781.7	25919.2	188841	11802.6	42026.8	129580	117411	0	93629.8	1.65145e+06	9920.42
Eicosapentaenoic Acid (C20:5n3 EPA)	Lipid	Long Chain Fatty Acid	HMDB0001999	Meta_350	7.899	301.216	[M-H]-	Negative_NH4HCO3	21.95	31528.5	25289.2	17878.6	43119.9	98697.2	13821.9	15466.6	11886.3	12090.6	12269.1	11044.3	0	13397.2	0	12958.2	12313.7	80506.3	24040.5	37268.5	20001.8	764926	98654.5	23577.4	29490.2	23533.7	9455.06	10132.3	12401.2	12307.3	10989.8	13138	9547	15875.9	10283.9	49391.5	10523.8	28946.8	14369.8	38955.3	57556.2
5-Dodecenoic Acid (C12:1n7)	Lipid	Medium Chain Fatty Acid	HMDB0000529	Meta_301	7.532	197.154	[M-H]-	Negative_NH4HCO3	9.36	22626.6	24131.4	48086.3	74243.8	97090	48193.4	19789.9	147987	64732.7	44952.3	38650.9	84669.9	62937.3	10357.3	27350.4	204804	57257.9	43527.7	170998	62899.8	179134	78281.5	25193.2	38900.7	107959	64088.1	11490.7	26879.9	12560.9	63395.9	44097.4	89314.8	41578.6	41175.3	71892.4	108812	63582.8	60465.5	57119.4	16503.7
2'-Deoxyuridine	Nucleotide	Pyrimidine Metabolism, Uracil containing	HMDB0000012	Meta_320	1.4	227.067	[M-H]-	Negative_NH4HCO3	7.22	0	22470.5	125363	115078	193105	117370	0	0	0	134512	242965	0	0	46621.5	132293	11160.2	15626	0	25284.8	0	655227	6741.45	15934.6	0	0	0	0	0	27048.7	6046.98	9266.57	0	0	0	93297.9	150187	0	0	69923.8	14860
Myo-Inositol	Lipid	Inositol Metabolism	HMDB0000211	Meta_318	0.963	225.061	[M-H]-	Negative_NH4HCO3	33.28	25741.9	21967.7	6645.87	0	16677	32943.7	0	1.11512e+07	65441.4	0	282464	445425	66330.5	0	56134.8	0	83450.9	0	25714	28206.1	18343.1	267070	11092.7	22565.4	2.55264e+06	0	0	91658.9	51834.6	0	288163	0	440623	92127.6	113225	221187	88243.4	6835.09	70689.7	215942
Undecylenic Acid (C11:1n1)	Lipid	Medium Chain Fatty Acid	HMDB0033724	Meta_289	7.423	183.138	[M-H]-	Negative_NH4HCO3	12.93	9902.88	18834.4	16497.5	38475.4	9830.83	28234.4	12712.4	68069	13021.6	12392.9	19864.9	17222	32690.7	39201	16513.6	23547.6	24107.1	24192.6	68493.6	28762.9	39811.5	33646.7	14738.1	10900.8	10395.9	10676	18505.3	13459.7	12436.2	37435.2	17737.9	35501.5	28466	17539.6	12766	24507	10446.3	24875.7	49588.9	11910.8
N-Acetylmethionine	Amino Acid	Methionine, Cysteine, SAM and Taurine Metabolism	HMDB0011745	Meta_297	1.757	190.054	[M-H]-	Negative_NH4HCO3	15.22	7149.71	17164.4	1.30022e+06	249597	73826.2	110642	7785.94	14144.7	13768.3	1.33787e+06	207918	0	126585	188581	199011	102016	5713.7	115245	173458	0	636612	38743.4	154269	0	0	0	0	149759	7438.29	0	0	0	0	6597.44	449474	342660	0	0	50939.1	5621.26
Cysteine S-sulfate	Amino Acid	Methionine, Cysteine, SAM and Taurine Metabolism	HMDB0000731	Meta_304	0.898	199.967	[M-H]-	Negative_NH4HCO3	10.98	8355.3	12023.8	162668	40202.5	0	42727.2	9129.04	15579.5	27563.7	219953	8530.65	26126.6	14741.2	0	16463.2	124124	32431.5	74784.8	218715	25144.1	229511	0	13106.4	24422	10762.6	58475.6	27322.9	0	0	0	0	91285.8	10775.6	0	0	0	8421.4	40897.8	11101	0
Glycerophosphoethanolamine	Lipid	Glycerolipid and Phospholipid Metabolism	HMDB0000114	Meta_316	0.953	214.048	[M-H]-	Negative_NH4HCO3	9.34	0	9787.36	157922	13133.9	270554	12304.7	0	14292.4	7979.39	198147	112290	0	17152.3	0	0	29016.2	0	0	106128	19862.2	27890.8	75209.7	0	0	165850	0	7196.86	10171	7845.08	0	0	0	7756.42	26476.3	129330	126281	143681	0	20333.2	231243
Gentisate	Amino Acid	Tyrosine Metabolism	HMDB0000152	Meta_267	1.38	153.019	[M-H]-	Negative_NH4HCO3	13.87	0	9315.23	17236.2	280144	61435.4	123641	28724.7	15369.9	21139.1	9269.57	0	18253.9	390990	96521.7	132842	377250	9627.18	21273	482772	17985.1	7154.32	8003.54	14739.9	368890	801151	8047.62	16212.6	10609.4	0	0	22933.1	17374.9	0	9110.86	142207	117154	513833	52841.1	84558.9	700175
1-Carboxyethylleucine	Amino Acid	Leucine, Isoleucine and Valine Metabolism	HMDB0240626	Meta_305	4.132	202.108	[M-H]-	Negative_NH4HCO3	14.58	8181.13	9209.23	186922	131953	218301	304338	77582.1	113893	66056	193768	255895	159310	454033	22446.8	16892.4	463247	9674.87	71421.2	607071	117260	247259	23735.6	23356.5	87275.4	688375	0	9205.79	51321.3	7582.46	25352	58016.7	10329.4	30494.6	12986.9	204352	265106	119896	9842.46	9986.06	314160
1-Methylpseudouridine	Xenobiotics	Natural Product/Food/Plant		Meta_428	1.244	257.078	[M-H]-	Negative_FA	20.49	284466	0	2.55566e+06	720813	1.47275e+06	1.10075e+06	229328	0	276099	3.11195e+06	1.53025e+06	225275	740316	116739	188520	901402	221497	667724	953721	390429	1.05532e+06	316023	102476	200874	229806	77823.6	0	387989	0	88299.7	612504	109294	194882	398119	898206	1.00623e+06	0	0	936260	99875.8
5-Methyluridine	Nucleotide	Pyrimidine Metabolism, Uracil containing	HMDB0000884	Meta_164	1.24	259.093	[M+H]+	Positive	5.1	71099.6	0	1.48994e+06	116774	317150	803177	159490	0	262293	1.27467e+06	697016	310214	289614	51907.1	121951	285383	200647	546004	702977	218040	818738	0	78325.3	95565.4	279420	215848	0	236626	0	139448	358139	119560	63136.4	218244	189440	390753	78456.6	57652	183765	0
Methylhistamine	Amino Acid	Histidine Metabolism	HMDB0000898	Meta_32	0.871	126.103	[M+H]+	Positive	17318.7	0	0	1.46517e+06	537550	57669.6	6.22036e+06	0	683771	60287.3	2.41249e+06	2.8266e+06	47959	744364	2.10824e+06	2.26016e+06	2.41595e+06	64375.9	252493	4.21206e+06	0	2.24175e+06	0	0	1.14971e+06	47659.4	0	0	0	38579.2	258145	201993	0	36835.9	340089	206196	74000.6	4.15458e+06	0	56779.7	5.29285e+06
Gamma-Glutamyl-Cysteine	Peptide	Gamma-glutamyl Amino Acid	HMDB0001049	Meta_158	1.24	251.08	[M+H]+	Positive	4.76	0	0	982567	88969.2	63874	90662.1	0	0	0	818408	276970	0	109482	267167	571041	55892.1	99497.3	0	83535	0	0	0	0	0	0	0	0	0	62514.1	196898	243404	0	0	278396	258447	287263	82379.8	0	55815.9	0
Glycochenodeoxycholic Acid	Lipid	Bile Acid, glycine conjungate	HMDB0000637	Meta_436	6.552	448.308	[M-H]-	Negative_FA	49635.4	145328	0	354821	384381	205499	39248	0	102209	0	253848	102353	118011	122982	0	76140.5	452147	94659.2	0	807253	462289	374697	1.25027e+06	0	56454.4	0	76730.5	0	0	0	0	88566.5	0	0	100253	55745.9	0	44059.9	0	83413.2	53303.9
Lactoylphenylalanine	Peptide	Pseudodipeptides (N-Lactoyl-amino acids )	HMDB0062175	Meta_142	5.335	238.107	[M+H]+	Positive	5204.13	52062.6	0	324247	230841	330501	851594	209091	144623	196020	441233	512137	389196	546988	0	53503.6	1.16957e+06	190132	289034	1.42262e+06	282342	259798	0	144843	208867	56330.6	0	0	84273.7	0	0	53344.9	0	101636	103921	315356	317304	301206	117747	0	644833
Naringenin	Unclassified	Unclassified		Meta_432	5.878	271.062	[M-H]-	Negative_FA	93.47	108856	0	286212	0	0	0	25724.8	42141.1	211818	223435	268944	750384	1.62854e+06	391776	402433	0	119799	207442	33309.7	0	508982	39730.8	2.44608e+07	408460	0	0	0	2.79029e+07	752652	819694	6.27204e+06	0	2.13152e+06	6.82184e+06	4.64187e+07	4.73494e+07	0	212101	1.53192e+06	0
Glycocholic Acid	Lipid	Bile Acid, glycine conjungate	HMDB0000138	Meta_437	6.384	464.304	[M-H]-	Negative_FA	49235.2	0	0	129579	140165	94155.7	0	58549.8	0	0	145391	0	114027	0	0	0	242479	0	0	291728	183178	169126	395760	0	0	0	0	0	0	0	0	32617.3	0	0	0	0	0	104349	0	0	120765
Cortisol	Lipid	Corticosteroids	HMDB0000063	Meta_218	5.717	363.206	[M+2H]2+	Positive	61846.2	88828.3	0	100591	749824	69985.9	201763	0	50623.8	59068.9	0	0	0	205864	48616.8	187079	0	0	295400	91048.3	61563.2	53028.4	0	81699.5	0	0	0	0	64406.7	0	0	0	0	61628.8	133161	183977	496578	461755	0	77550.1	466703
Glycoursodeoxycholic Acid	Lipid	Bile Acid, glycine conjungate	HMDB0000708	Meta_435	6.254	448.307	[M-H]-	Negative_FA	39669.8	0	0	97418.4	0	172748	0	0	24305	0	0	0	0	32145.6	0	0	172387	0	0	194890	189903	55530.6	317766	0	0	0	0	0	0	0	0	0	0	0	0	0	0	0	0	0	27473.1
Hexadecadienoate (16:2n6)	Lipid	Long Chain Fatty Acid	HMDB0000477	Meta_329	7.796	251.201	[M-H]-	Negative_NH4HCO3	16.3	28737.4	0	58890.3	128059	180791	13142.1	91686	63516.1	22611.2	22507.4	8415.43	12717.9	137206	12254	12148.3	282175	12939.2	48989.1	453701	187494	274678	31992.4	9974.01	75878	1.1931e+06	74657.2	22337.9	46246.8	13646.8	11738.2	19146.7	15023.8	28838.6	10766.3	51189.1	29539.5	22660.2	11150.4	103418	11521.5
Hesperetin	Unclassified	Unclassified		Meta_349	6.635	301.072	[M-H]-	Negative_NH4HCO3	453.45	0	0	37637	0	0	0	0	0	119142	43886	0	543697	0	345841	316197	0	0	113738	0	0	322941	0	2.11951e+07	0	0	0	0	2.35023e+07	0	0	5.00185e+06	0	890037	5.95811e+06	4.14334e+07	3.91698e+07	0	0	1.17422e+06	0
Neodiosmin	Unclassified	Unclassified		Meta_442	5.378	609.185	[M-H]-	Negative_FA	1390495	0	0	24828.3	0	0	299275	0	0	274857	22398.2	0	1.72677e+06	117626	361283	386517	24887.2	0	1.46131e+06	73688.6	0	166352	0	1.38727e+07	47417.5	0	0	0	1.63895e+07	0	0	1.19376e+07	0	6.21319e+06	1.36475e+07	30089352	3.30873e+07	0	0	2.59908e+06	0
Naringenin-7-O-rutinoside	Unclassified	Unclassified		Meta_441	5.213	579.173	[M-H]-	Negative_FA	637580	0	0	23636.7	0	0	144820	0	0	67067.1	0	0	668220	0	77905.4	92467.9	0	0	704277	0	0	27924.5	0	6.28704e+06	0	0	0	0	7.33527e+06	0	0	3.44395e+06	0	3.14348e+06	4.24164e+06	1.34233e+07	1.41549e+07	0	0	1.01646e+06	0
Perfluorobutyric Acid	Xenobiotics	Chemical	HMDB0253102	Meta_315	5.097	212.979	[M-H]-	Negative_NH4HCO3	20.95	9557.19	0	20660.6	23823.8	27090.4	7971.09	14761.8	9358.82	19499.9	28612.8	11224.4	20449.6	12595.7	9134.35	11207.3	26515.6	0	22580.1	50903.4	0	12178.8	19850.6	23422.8	13336.3	24464.3	46216.2	11145.7	11386.2	36957.1	34950.6	125604	34656	0	56096.2	33720.2	9837.18	10433	0	0	9158.9
CDP	Nucleotide	Pyrimidine Metabolism, Cytidine containing	HMDB0001546	Meta_371	0.779	402.012	[M-H]-	Negative_NH4HCO3	14.46	0	0	15284.6	1.16093e+06	0	0	52213.3	20610.1	73880.9	0	251316	11835.6	650824	0	0	9270	0	66863.8	9669.43	65064.9	19992.3	16206.5	0	195742	50591.2	202264	0	0	14709.6	0	447175	126552	109517	458995	0	0	65481.4	95796.8	1.89747e+06	179030
7-Methylguanosine	Nucleotide	Purine Metabolism, Guanine containing	HMDB0001107	Meta_202	0.851	298.112	[M+H]+	Positive	28.28	1.44887e+06	0	0	2.93148e+06	1.75708e+06	187319	914223	2.91297e+06	1.8152e+06	376711	3.73638e+06	745312	1.82e+06	0	99555.6	0	1.12553e+06	521105	159414	1.81518e+06	0	7.34034e+06	879665	1.75734e+06	374886	7.54283e+06	1.08164e+06	786853	3.86134e+06	5.6117e+06	5.86546e+06	5.09185e+06	1.14554e+06	6.57411e+06	1.57582e+06	1.09583e+06	368684	230296	2.96766e+06	596030
5-Phosphoribosyl-1-Pyrophosphate	Nucleotide	Purine and Pyrimidine Metabolism	HMDB0000280	Meta_370	0.833	388.943	[M-H]-	Negative_NH4HCO3	21.8	44826.8	0	0	67288.7	23318.5	52634.9	16911.4	239243	87389.7	0	21196.3	42983.8	144763	0	12092	0	0	0	0	22242.8	16199.9	129152	0	13256.9	0	21339.4	13789.5	19832	13499.5	11721.2	25861.9	0	20888.4	33560.3	10067.9	0	0	0	55691.9	15102.8
Taurochenodeoxycholic Acid	Lipid	Bile Acid, taurine conjungate	HMDB0000951	Meta_438	6.272	498.291	[M-H]-	Negative_FA	82611.9	41371.4	0	0	336774	45715.4	0	58441.9	1.27059e+06	0	25415.6	0	0	0	0	0	155573	0	852980	175786	48421.2	30178.1	71149.8	217903	0	0	0	0	387748	0	0	318527	68525.5	499253	341512	689619	666248	831754	0	164696	1.03589e+06
Myo-Inositol-4-Phosphate	Lipid	Inositol Metabolism	HMDB0001313	Meta_376	0.846	519.054	[M-H]-	Negative_NH4HCO3	24.46	22240.2	0	0	121156	164544	130881	35881.8	850292	15998.9	20350.5	43490.9	253973	32539.7	47154.1	46243.7	0	335938	0	0	44982.3	43747.1	654552	0	0	334028	0	0	19387.3	0	24323.1	17659.4	0	21428.7	23780.6	222617	109297	224597	0	30200.3	216586
UDP-N-Acetyl-Glucosamine	Carbohydrate	Amino sugar and Nucleotide sugar Metabolism	HMDB0000290	Meta_377	0.863	606.077	[M-H]-	Negative_NH4HCO3	21.49	19905.7	0	0	0	0	113295	0	0	0	0	696674	0	542331	346160	198395	0	0	62636.1	0	103776	190589	30036.9	0	355939	0	101101	0	0	0	0	0	0	162367	55405.9	0	0	49746.2	181471	69473.1	50134.2
UDP	Nucleotide	Pyrimidine Metabolism, Uracil containing	HMDB0000295	Meta_372	0.78	402.996	[M-H]-	Negative_NH4HCO3	24.63	7878.59	0	0	181462	0	0	19848.1	0	0	0	62704.7	13093.8	106210	0	0	0	0	0	0	0	44572.9	0	0	0	9380.91	0	0	0	9661.32	9712.48	498127	0	0	409533	0	0	24883.8	0	2.08781e+06	6539.68
4-Methylcatechol Sulfate	Xenobiotics	Benzoate Metabolism	HMDB0240461	Meta_307	4.157	203.002	[M-H]-	Negative_NH4HCO3	12.76	0	0	0	193449	84982.4	51846.9	19891.7	10565.7	6492.81	0	9049.64	9352.67	262761	0	0	9448.21	0	20644.9	23117.7	0	0	0	0	68403.4	0	223383	0	7422.82	30743.7	144717	25300.7	135968	79572.1	38857.8	11376.8	17167.1	613516	11509.7	41829.8	865989
CMP	Nucleotide	Pyrimidine Metabolism, Cytidine containing	HMDB0000095	Meta_361	0.851	322.045	[M-H]-	Negative_NH4HCO3	36.78	0	0	0	12445.4	0	19459	15429.7	42089.3	14801.6	0	0	20893.6	922795	29594.8	60129.8	0	0	25493.6	0	11701.4	0	0	12119.9	352386	0	0	83043.9	0	0	9547.17	0	46519.5	91124.4	16944.7	0	0	0	0	2.02598e+06	0
LACTULOSE	Unclassified	Unclassified		Meta_216	0.961	360.15	[M+NH4]+	Positive	7174736	0	0	0	0	0	4.98879e+06	0	3.85508e+08	441453	0	0	3.70073e+06	298120	0	0	0	0	3.63712e+06	0	277162	0	0	0	0	1.53037e+08	0	234368	0	126745	0	418574	0	182028	538993	0	0	266654	0	791600	105764
LPC 18:2_sn1	Lipid	Glycerophospholipid (lysophosphatidylcholine)	HMDB0010386	Meta_224	7.001	520.341	[M+H]+	Positive	84836.9	0	0	0	118440	129699	0	0	1.68542e+06	0	0	152494	0	0	0	78873.1	196100	0	0	276892	136714	2.25531e+06	640672	0	100608	0	0	0	0	0	0	0	0	0	0	133371	221364	97114.7	0	659018	101943
N-Acetylcarnosine	Peptide	Hybrid peptide	HMDB0255058	Meta_182	0.992	269.124	[M+H]+	Positive	3.95	0	0	0	89083.5	0	0	0	274104	0	0	0	0	0	0	0	0	0	0	0	0	0	0	0	0	326251	0	0	0	0	0	0	0	0	0	0	0	860563	0	0	1.06862e+06
N6-Succinyladenosine	Nucleotide	Purine Metabolism, Adenine containing	HMDB0000912	Meta_222	2.021	384.114	[M+H]+	Positive	59790.7	0	0	0	886212	0	31095.2	53019.1	32912.9	122924	0	103050	2.41615e+06	433404	0	0	510084	49565.6	0	737325	40421.6	60386.2	0	0	72062.5	0	85894.3	0	0	0	141498	38361.7	43180.6	128384	42896.5	0	0	386115	0	0	389586
Phe-Trp	Peptide	Dipeptide	HMDB0029006	Meta_214	5.363	352.165	[M+H]+	Positive	77785	0	0	0	0	207490	62770.6	0	0	44553.9	42826.2	312339	0	0	325697	115299	0	38888.3	0	0	0	114164	52571.6	41916.1	0	0	0	0	45177.6	0	0	0	0	0	0	136220	0	0	0	0	181192
SM 34:1;O2|SM 18:1;O2/16:0	Lipid	Sphingolipid Metabolism	HMDB0010169	Meta_228	9.649	703.575	[M+H]+	Positive	297140	0	0	0	2.08841e+06	0	0	0	0	0	0	0	0	0	0	0	0	0	0	136256	0	3.27523e+06	951379	0	0	0	0	0	0	0	0	0	0	0	0	0	0	0	0	938244	150981
Stercobilin	Cofactors and Vitamins	Hemoglobin and Porphyrin Metabolism	HMDB0240259	Meta_226	5.723	595.352	[M+2H]2+	Positive	91372.1	0	0	0	0	0	2.53293e+07	0	0	858383	0	952900	0	523183	146120	108591	2.44203e+07	0	877116	2.86514e+07	0	192924	0	8.80906e+06	362161	638678	0	815871	1.01527e+07	0	0	0	0	7.2386e+06	0	1.6576e+07	1.76153e+07	0	0	2.97927e+07	0
Taurocholic Acid	Lipid	Bile Acid, taurine conjungate	HMDB0000036	Meta_439	6.111	514.284	[M-H]-	Negative_FA	31340.8	0	0	0	0	0	0	0	25703.8	0	0	0	24682	0	0	0	32023.6	0	0	0	0	0	0	0	0	0	0	0	0	0	0	0	0	0	0	0	0	61490.4	0	0	129043
UMP	Nucleotide	Pyrimidine Metabolism, Uracil containing	HMDB0000288	Meta_362	0.857	323.029	[M-H]-	Negative_NH4HCO3	46.61	0	0	0	115770	0	75667.7	0	27790.3	194862	0	0	15354	1.1516e+06	69056.8	45245.7	0	0	85054.4	0	65460.2	0	0	14502.1	299376	0	0	10010.8	9979.18	0	0	49112.7	0	263563	38744.7	11894.9	16751.2	0	99862.5	2.80775e+06	16224.1
[truncated: 12 more columns]

## Sheet: Differentially abundan
Metabolite name	Category1	Category2	p.value	fdr	VIP	regulation
Urea	Amino Acid	Urea cycle; Arginine and Proline Metabolism	0.0146925	0.0146925	1.40257	down
7-Methylguanosine	Nucleotide	Purine Metabolism, Guanine containing	0.0354675	0.0354675	1.19801	down
Fructoselysine	Xenobiotics	Natural Product/Food/Plant	0.035773	0.035773	1.20811	down
Prolinamide	Xenobiotics	Natural Product/Food/Plant	0.0490212	0.0490212	1.12732	down
Erucamide	Lipid	Fatty Acid Metabolism (Fatty Amide)	0.0234272	0.0234272	1.28532	down
Phosphate	Energy	Oxidative Phosphorylation	0.0142491	0.0142491	1.40871	down
Citraconic acid	Unclassified	Unclassified	0.0173543	0.0173543	1.38869	down
Citraconic Acid	Lipid	Fatty Acid, Dicarboxylate	0.0225662	0.0225662	1.2341	down
Aconitic Acid	Carbohydrate	Citrate cycle (TCA cycle)	0.00286876	0.00286876	1.70329	down
Citric Acid	Carbohydrate	Citrate cycle (TCA cycle)	0.00859706	0.00859706	1.53405	down
4-Methylcatechol Sulfate	Xenobiotics	Benzoate Metabolism	0.0393111	0.0393111	1.15858	down
Vanillactate	Xenobiotics	Natural Product/Food/Plant	0.0303427	0.0303427	1.22622	down
Perfluorobutyric Acid	Xenobiotics	Chemical	0.0160602	0.0160602	1.38013	down
Myristic Acid (C14:0)	Lipid	Long Chain Fatty Acid	0.0448401	0.0448401	1.17082	down
Palmitic Acid (C16:0)	Lipid	Long Chain Fatty Acid	0.0239464	0.0239464	1.34404	down
2-Hydroxypalmitate	Lipid	Fatty Acid, Monohydroxy	0.0470776	0.0470776	1.19835	down
Stearic Acid (C18:0)	Lipid	Long Chain Fatty Acid	0.0165136	0.0165136	1.4124	down
6-Gingerol	Xenobiotics	Natural Product/Food/Plant	0.0094187	0.0094187	1.46936	down
dCMP	Nucleotide	Pyrimidine Metabolism, Cytidine containing	0.0111384	0.0111384	1.48859	down
Arachidate (C20:0)	Lipid	Long Chain Fatty Acid	0.00425929	0.00425929	1.65421	down
Beta-Citrylglutamate	Amino Acid	Alanine, Aspartate and Glutamate Metabolism	0.00557229	0.00557229	1.55049	down
AMP	Nucleotide	Purine Metabolism, Adenine containing	0.0269479	0.0269479	1.28374	down
CDP	Nucleotide	Pyrimidine Metabolism, Cytidine containing	0.00306007	0.00306007	1.69051	down
Perfluorooctanoic Acid (PFOA)	Xenobiotics	Chemical	0.00654053	0.00654053	1.51798	down
3-Hydroxyhexanoate	Lipid	Fatty Acid, Monohydroxy	0.0461479	0.0461479	1.17409	down
Isovalerylglycine	Amino Acid	Leucine, Isoleucine and Valine Metabolism	0.00105012	0.00105012	1.80932	down
Methylmalonylglycine	Lipid	Fatty Acid Metabolism (Acyl glycines)	0.0320904	0.0320904	1.16013	down
N-Acetylhistidine	Amino Acid	Histidine Metabolism	0.0125528	0.0125528	1.44347	down
Dodecanedioate (C12-DC)	Lipid	Fatty Acid, Dicarboxylate	0.0204488	0.0204488	1.37141	down
Tetradecanedioate (C14-DC)	Lipid	Fatty Acid, Dicarboxylate	0.0371732	0.0371732	1.26216	down
Naringenin	Unclassified	Unclassified	0.00152899	0.00152899	1.79275	down
Taurochenodeoxycholic Acid	Lipid	Bile Acid, taurine conjungate	0.0109746	0.0109746	1.49407	down
Stachydrine	Xenobiotics	Natural Product/Food/Plant	0.0239865	0.0239865	1.40746	down
N-Acetylproline	Amino Acid	Urea cycle; Arginine and Proline Metabolism	0.00012276	0.00012276	2.12268	down
L-Arginine	Amino Acid	Urea cycle; Arginine and Proline Metabolism	0.00984695	0.00984695	1.44352	down
Ortophosphate	Unclassified	Unclassified	0.146304	0.146304	0.874453	unchanged
N-Acetylglutamate	Amino Acid	Alanine, Aspartate and Glutamate Metabolism	0.420117	0.420117	0.512223	unchanged
Lactoylvaline	Peptide	Pseudodipeptides (N-Lactoyl-amino acids )	0.168457	0.168457	0.765276	unchanged
Quinic Acid	Amino Acid	Shikimic acid pathway	0.557121	0.557121	0.346452	unchanged
m-Cumenyl methylcarbamate	Unclassified	Unclassified	0.515493	0.515493	0.445687	unchanged
Cyclo(L-Val-L-Pro)	Peptide	Dipeptide	0.167864	0.167864	0.866627	unchanged
FRUCTOSE	Unclassified	Unclassified	0.400598	0.400598	0.563689	unchanged
Leu-Ala	Peptide	Dipeptide	0.266528	0.266528	0.556629	unchanged
Ile-Ala	Peptide	Dipeptide	0.996524	0.996524	0.0274497	unchanged
2-Piperidinone	Xenobiotics	Natural Product/Food/Plant	0.139183	0.139183	0.938845	unchanged
Ala-Leu	Peptide	Dipeptide	0.188953	0.188953	0.739098	unchanged
N2-Acetyl,N6-Methyllysine	Amino Acid	Lysine Metabolism	0.420453	0.420453	0.454848	unchanged
L-Acetylcarnitine	Lipid	Fatty Acid Metabolism (Acyl Carnitine)	0.275292	0.275292	0.619945	unchanged
Lactoylleucine	Peptide	Pseudodipeptides (N-Lactoyl-amino acids )	0.0879797	0.0879797	0.98505	unchanged
Ser-Val	Peptide	Dipeptide	0.102712	0.102712	0.925889	unchanged
Cyclo(Leu-Pro)	Peptide	Dipeptide	0.62965	0.62965	0.269429	unchanged
Cyclohexanamine	Xenobiotics	Chemical	0.141361	0.141361	0.92545	unchanged
ALPHA-TOCOPHEROL	Unclassified	Unclassified	0.295522	0.295522	0.643846	unchanged
N-Acetylarginine	Amino Acid	Urea cycle; Arginine and Proline Metabolism	0.140494	0.140494	0.929649	unchanged
Propionylcarnitine	Lipid	Fatty Acid Metabolism (Acyl Carnitine)	0.42753	0.42753	0.468264	unchanged
Ser-Leu	Peptide	Dipeptide	0.859577	0.859577	0.0727605	unchanged
Propionylcarnitine-D3	Unclassified	Unclassified	0.12353	0.12353	0.941217	unchanged
N-Acetyl-D-Glucosamine	Carbohydrate	Amino sugar and Nucleotide sugar Metabolism	0.303576	0.303576	0.755834	unchanged
5-Valerolactone	Xenobiotics	Chemical	0.261595	0.261595	0.760692	unchanged
Carnosine	Peptide	Hybrid peptide	0.120952	0.120952	0.968628	unchanged
Deoxycytidine	Nucleotide	Pyrimidine Metabolism, Cytidine containing	0.171943	0.171943	0.769806	unchanged
Pro-Hydroxy-Pro	Amino Acid	Urea cycle; Arginine and Proline Metabolism	0.0846405	0.0846405	1.03114	unchanged
Val-Leu	Peptide	Dipeptide	0.0858891	0.0858891	0.954458	unchanged
Leu-Val	Peptide	Dipeptide	0.781958	0.781958	0.114054	unchanged
Butyrylcarnitine	Lipid	Fatty Acid Metabolism (Acyl Carnitine)	0.32537	0.32537	0.618433	unchanged
1-Aminocyclopropane-1-Carboxylate	Xenobiotics	Natural Product/Food/Plant	0.11234	0.11234	0.828617	unchanged
Isobutyrylcarnitine (C4)	Amino Acid	Leucine, Isoleucine and Valine Metabolism	0.618172	0.618172	0.327731	unchanged
Thr-Leu	Peptide	Dipeptide	0.269706	0.269706	0.640632	unchanged
Lactoylphenylalanine	Peptide	Pseudodipeptides (N-Lactoyl-amino acids )	0.09299	0.09299	0.954631	unchanged
Gly-Tyr	Peptide	Dipeptide	0.112785	0.112785	0.942437	unchanged
N,N-Dimethyl-Proline-Proline Betaine	Amino Acid	Urea cycle; Arginine and Proline Metabolism	0.535205	0.535205	0.331034	unchanged
PHENETHYLAMINE	Unclassified	Unclassified	0.664804	0.664804	0.314836	unchanged
Cytidine	Nucleotide	Pyrimidine Metabolism, Cytidine containing	0.176955	0.176955	0.783595	unchanged
Ile-Ile	Peptide	Dipeptide	0.0511096	0.0511096	1.08785	unchanged
Leu-Ile	Peptide	Dipeptide	0.478814	0.478814	0.36126	unchanged
Choline	Lipid	Glycerolipid and Phospholipid Metabolism	0.729322	0.729322	0.187731	unchanged
Ile-Asn	Peptide	Dipeptide	0.10225	0.10225	0.934594	unchanged
Leu-Gly-Gly	Peptide	Small peptide	0.9125	0.9125	0.0287764	unchanged
Isovalerylcarnitine (C5)	Amino Acid	Leucine, Isoleucine and Valine Metabolism	0.43985	0.43985	0.415929	unchanged
2-Methylbutyrylcarnitine (C5)	Amino Acid	Leucine, Isoleucine and Valine Metabolism	0.462182	0.462182	0.42759	unchanged
Tryptophan Betaine	Amino Acid	Tryptophan Metabolism	0.885198	0.885198	0.0193792	unchanged
Deoxyadenosine	Nucleotide	Purine Metabolism, Adenine containing	0.959399	0.959399	0.00111336	unchanged
Daidzein	Xenobiotics	Natural Product/Food/Plant	0.117353	0.117353	0.842259	unchanged
2-Methylcytidine	Nucleotide	Pyrimidine Metabolism, Cytidine containing	0.05182	0.05182	1.16864	unchanged
2'-O-Methyluridine	Nucleotide	Pyrimidine Metabolism, Uracil containing	0.765279	0.765279	0.227676	unchanged
Hexanoylcarnitine	Lipid	Fatty Acid Metabolism (Acyl Carnitine)	0.446588	0.446588	0.432196	unchanged
Glucose 1-Phosphate	Carbohydrate	Glycolysis, Gluconeogenesis, and Pyruvate Metabolism	0.914259	0.914259	0.0147874	unchanged
Cytosine	Nucleotide	Pyrimidine Metabolism, Cytidine containing	0.305628	0.305628	0.630964	unchanged
Methylmalonylcarnitine	Lipid	Fatty Acid Metabolism (Acyl Carnitine)	0.992798	0.992798	0.0627187	unchanged
3-Hydroxyisovalerylcarnitine	Amino Acid	Leucine, Isoleucine and Valine Metabolism	0.731138	0.731138	0.229787	unchanged
Val-Phe	Peptide	Dipeptide	0.0708348	0.0708348	0.970379	unchanged
Thr-Phe	Peptide	Dipeptide	0.136436	0.136436	0.88534	unchanged
Inosine	Nucleotide	Purine Metabolism, (Hypo)Xanthine/Inosine containing	0.280657	0.280657	0.618688	unchanged
Ser-Tyr	Peptide	Dipeptide	0.387124	0.387124	0.629077	unchanged
N-ACETYLNEURAMINATE	Unclassified	Unclassified	0.62658	0.62658	0.309349	unchanged
Gamma-Glutamylglutamine	Peptide	Gamma-glutamyl Amino Acid	0.553583	0.553583	0.417418	unchanged
Gamma-Glutamylglutamate	Peptide	Gamma-glutamyl Amino Acid	0.851032	0.851032	0.135051	unchanged
Phe-Leu	Peptide	Dipeptide	0.768667	0.768667	0.120968	unchanged
Uracil	Nucleotide	Pyrimidine Metabolism, Uracil containing	0.475845	0.475845	0.326646	unchanged
Phe-Ile	Peptide	Dipeptide	0.181215	0.181215	0.75497	unchanged
N1-Methyladenosine	Nucleotide	Purine Metabolism, Adenine containing	0.35897	0.35897	0.546891	unchanged
Guanosine	Nucleotide	Purine Metabolism, Guanine containing	0.0643519	0.0643519	1.128	unchanged
Xanthosine	Nucleotide	Purine Metabolism, (Hypo)Xanthine/Inosine containing	0.876953	0.876953	0.122373	unchanged
Arg-Leu	Peptide	Dipeptide	0.879258	0.879258	0.0793098	unchanged
Ile-Arg	Peptide	Dipeptide	0.260631	0.260631	0.67614	unchanged
Tyr-Ile	Unclassified	Unclassified	0.505581	0.505581	0.416466	unchanged
5,6-Dihydrouracil	Nucleotide	Pyrimidine Metabolism, Uracil containing	0.0750408	0.0750408	1.06077	unchanged
Leu-Tyr	Peptide	Dipeptide	0.533829	0.533829	0.38965	unchanged
Ile-Tyr	Peptide	Dipeptide	0.144219	0.144219	0.780685	unchanged
Leu-Gly-Leu	Peptide	Small peptide	0.821307	0.821307	0.0805479	unchanged
Epigallocatechin	Xenobiotics	Natural Product/Food/Plant	0.552558	0.552558	0.431349	unchanged
N-ACETYLNEURAMINATE	Unclassified	Unclassified	0.442682	0.442682	0.451412	unchanged
Gamma-Glutamyltyrosine	Peptide	Gamma-glutamyl Amino Acid	0.54599	0.54599	0.39652	unchanged
Phe-Phe	Peptide	Dipeptide	0.191305	0.191305	0.821214	unchanged
Phe-Tyr	Peptide	Dipeptide	0.440406	0.440406	0.380135	unchanged
His-Trp	Peptide	Dipeptide	0.484069	0.484069	0.414197	unchanged
Cortisone	Lipid	Corticosteroids	0.586656	0.586656	0.339778	unchanged
SUCROSE	Unclassified	Unclassified	0.805329	0.805329	0.111235	unchanged
Prolinamide	Xenobiotics	Natural Product/Food/Plant	0.56087	0.56087	0.267858	unchanged
Riboflavin	Cofactors and Vitamins	Vitamin B2 Metabolism	0.0841499	0.0841499	0.953776	unchanged
5-O-Methylvisammioside	Xenobiotics	Natural Product/Food/Plant	0.0572112	0.0572112	1.11525	unchanged
Propanoic Acid	Carbohydrate	Propanoate Metabolism	0.155888	0.155888	0.940708	unchanged
L-Proline	Amino Acid	Urea cycle; Arginine and Proline Metabolism	0.894322	0.894322	0.059349	unchanged
Glycolic Acid	Carbohydrate	Glyoxylate and dicarboxylate metabolism	0.156745	0.156745	0.770109	unchanged
Pyruvic Acid	Carbohydrate	Glycolysis, Gluconeogenesis, and Pyruvate Metabolism	0.879007	0.879007	0.0471195	unchanged
Sarcosine	Amino Acid	Glycine, Serine and Threonine Metabolism	0.41602	0.41602	0.525028	unchanged
Oxalic Acid	Cofactors and Vitamins	Ascorbate and Aldarate Metabolism	0.961216	0.961216	0.0694071	unchanged
Lactic Acid	Carbohydrate	Glycolysis, Gluconeogenesis, and Pyruvate Metabolism	0.859162	0.859162	0.167871	unchanged
Glycerol	Lipid	Glycerolipid and Phospholipid Metabolism	0.149551	0.149551	0.79216	unchanged
Alpha-Ketobutyrate	Amino Acid	Methionine, Cysteine, SAM and Taurine Metabolism	0.64632	0.64632	0.165023	unchanged
Hydroxypyruvic Acid	Amino Acid	Glycine, Serine and Threonine Metabolism	0.769793	0.769793	0.209888	unchanged
N-Acetylglycine	Amino Acid	Glycine, Serine and Threonine Metabolism	0.567409	0.567409	0.273542	unchanged
L-Serine	Amino Acid	Glycine, Serine and Threonine Metabolism	0.257403	0.257403	0.684259	unchanged
Fumaric Acid	Carbohydrate	Citrate cycle (TCA cycle)	0.932568	0.932568	0.0993528	unchanged
Ketoisovaleric Acid	Amino Acid	Leucine, Isoleucine and Valine Metabolism	0.377481	0.377481	0.466205	unchanged
Succinic Acid	Carbohydrate	Citrate cycle (TCA cycle)	0.540681	0.540681	0.275552	unchanged
Succinic Acid-D4(Neg_NH4HCO3)	Unclassified	Unclassified	0.147123	0.147123	0.855061	unchanged
Betaine	Amino Acid	Glycine, Serine and Threonine Metabolism	0.0911723	0.0911723	1.06518	unchanged
Heptanoic Acid (C7:0)	Lipid	Medium Chain Fatty Acid	0.977098	0.977098	0.0527911	unchanged
3-Ureidopropionate	Nucleotide	Pyrimidine Metabolism, Uracil containing	0.531659	0.531659	0.418616	unchanged
Malic Acid	Carbohydrate	Citrate cycle (TCA cycle)	0.311345	0.311345	0.527311	unchanged
Erythronic Acid	Carbohydrate	Amino sugar and Nucleotide sugar Metabolism	0.350287	0.350287	0.542032	unchanged
Phosphoethanolamine	Lipid	Glycerolipid and Phospholipid Metabolism	0.200588	0.200588	0.79271	unchanged
Octanoic Acid (C8:0)	Lipid	Medium Chain Fatty Acid	0.343146	0.343146	0.528612	unchanged
Alpha-Ketoglutaramate	Amino Acid	Alanine, Aspartate and Glutamate Metabolism	0.877138	0.877138	0.0570017	unchanged
Oxoglutaric Acid	Carbohydrate	Citrate cycle (TCA cycle)	0.481736	0.481736	0.4637	unchanged
2-Hydroxyglutaric Acid	Carbohydrate	Citrate cycle (TCA cycle)	0.655393	0.655393	0.323017	unchanged
Tartaric Acid	Carbohydrate	Glyoxylate and dicarboxylate metabolism	0.23137	0.23137	0.669086	unchanged
3-Phenylpropionic Acid	Xenobiotics	Benzoate Metabolism	0.159478	0.159478	0.849572	unchanged
2,3-Dihydroxybenzoate	Xenobiotics	Benzoate Metabolism	0.502509	0.502509	0.405523	unchanged
Gentisate	Amino Acid	Tyrosine Metabolism	0.109894	0.109894	0.931558	unchanged
L-Histidine	Amino Acid	Histidine Metabolism	0.0506492	0.0506492	1.16997	unchanged
Allantoin	Nucleotide	Purine Metabolism, (Hypo)Xanthine/Inosine containing	0.344786	0.344786	0.563603	unchanged
Nonanoic Acid (C9:0)	Lipid	Medium Chain Fatty Acid	0.073903	0.073903	1.05088	unchanged
8-Hydroxyoctanoate	Lipid	Fatty Acid, Monohydroxy	0.355362	0.355362	0.556698	unchanged
7-Methylguanine	Nucleotide	Purine Metabolism, Guanine containing	0.279468	0.279468	0.630641	unchanged
Quinolinate	Cofactors and Vitamins	Nicotinate and Nicotinamide Metabolism	0.180476	0.180476	0.801861	unchanged
Phosphoenolpyruvate	Carbohydrate	Glycolysis, Gluconeogenesis, and Pyruvate Metabolism	0.455265	0.455265	0.416618	unchanged
Urate	Nucleotide	Purine Metabolism, (Hypo)Xanthine/Inosine containing	0.0870689	0.0870689	1.00317	unchanged
3-Sulfo-L-Alanine	Amino Acid	Methionine, Cysteine, SAM and Taurine Metabolism	0.0701989	0.0701989	1.09343	unchanged
Glyceraldehyde 3-Phosphate	Carbohydrate	Glycolysis, Gluconeogenesis, and Pyruvate Metabolism	0.0574234	0.0574234	1.13059	unchanged
Phenylacetaldehyde	Amino Acid	Phenylalanine Metabolism	0.48936	0.48936	0.392346	unchanged
Glycerol 3-Phosphate	Lipid	Glycerolipid and Phospholipid Metabolism	0.737029	0.737029	0.235243	unchanged
Decanoic Acid (C10:0)	Lipid	Medium Chain Fatty Acid	0.576638	0.576638	0.341206	unchanged
Phenol Sulfate	Amino Acid	Tyrosine Metabolism	0.471124	0.471124	0.364993	unchanged
N-Acetyl-L-Aspartic Acid	Amino Acid	Alanine, Aspartate and Glutamate Metabolism	0.951363	0.951363	0.00836159	unchanged
N-Formylmethionine	Amino Acid	Methionine, Cysteine, SAM and Taurine Metabolism	0.10805	0.10805	0.95684	unchanged
4-Hydroxyphenylpyruvic Acid	Amino Acid	Tyrosine Metabolism	0.785069	0.785069	0.160296	unchanged
Hydroxyphenyllactic Acid	Amino Acid	Tyrosine Metabolism	0.87184	0.87184	0.145738	unchanged
Mannitol/Sorbitol	Carbohydrate	Polysaccharides and Oligosaccharides	0.139234	0.139234	0.907693	unchanged
Undecylenic Acid (C11:1n1)	Lipid	Medium Chain Fatty Acid	0.674134	0.674134	0.307542	unchanged
3-Methylcatechol	Unclassified	Unclassified	0.47656	0.47656	0.47333	unchanged
L-Tyrosine-D4(Neg_NH4HCO3)	Unclassified	Unclassified	0.075235	0.075235	1.04928	unchanged
Undecanoic Acid (C11:0)	Lipid	Medium Chain Fatty Acid	0.51689	0.51689	0.412519	unchanged
P-Cresol Sulfate	Xenobiotics	Benzoate Metabolism	0.942878	0.942878	0.0559086	unchanged
Azelaic acid	Unclassified	Unclassified	0.537407	0.537407	0.333062	unchanged
3-Hydroxydecanoate	Lipid	Fatty Acid, Monohydroxy	0.865698	0.865698	0.12234	unchanged
2,5-Dihydroxybenzenesulfonate	Xenobiotics	Chemical	0.495825	0.495825	0.319451	unchanged
N-Acetylmethionine	Amino Acid	Methionine, Cysteine, SAM and Taurine Metabolism	0.254794	0.254794	0.650266	unchanged
Glycine	Amino Acid	Glycine, Serine and Threonine Metabolism	0.311633	0.311633	0.600805	unchanged
Nicotinamide	Cofactors and Vitamins	Nicotinate and Nicotinamide Metabolism	0.052164	0.052164	1.08544	unchanged
D-Gluconic Acid	Carbohydrate	Pentose phosphate pathway	0.88729	0.88729	0.026781	unchanged
5-Dodecenoic Acid (C12:1n7)	Lipid	Medium Chain Fatty Acid	0.842394	0.842394	0.0255053	unchanged
Phosphothreonine	Amino Acid	Glycine, Serine and Threonine Metabolism	0.699779	0.699779	0.215692	unchanged
Dodecanoic Acid (C12:0)	Lipid	Medium Chain Fatty Acid	0.352918	0.352918	0.550419	unchanged
Cysteine S-sulfate	Amino Acid	Methionine, Cysteine, SAM and Taurine Metabolism	0.585808	0.585808	0.278842	unchanged
1-Carboxyethylleucine	Amino Acid	Leucine, Isoleucine and Valine Metabolism	0.437492	0.437492	0.450673	unchanged
1-Carboxyethylisoleucine	Amino Acid	Leucine, Isoleucine and Valine Metabolism	0.38453	0.38453	0.483963	unchanged
1,2,3-benzenetriol sulfate	Xenobiotics	Chemical	0.530658	0.530658	0.416725	unchanged
2-Methylcitrate/Homocitrate	Carbohydrate	Citrate cycle (TCA cycle)	0.123367	0.123367	0.938983	unchanged
Picolinic Acid	Amino Acid	Tryptophan Metabolism	0.493537	0.493537	0.475563	unchanged
4-Octylphenol	Xenobiotics	Chemical	0.069514	0.069514	1.08383	unchanged
N-ACETYL-PHENYLALANINE	Unclassified	Unclassified	0.734627	0.734627	0.13465	unchanged
Perseitol	Xenobiotics	Natural Product/Food/Plant	0.436212	0.436212	0.411603	unchanged
Glycerophosphoethanolamine	Lipid	Glycerolipid and Phospholipid Metabolism	0.379236	0.379236	0.488245	unchanged
N-Acetyl-L-Tyrosine	Amino Acid	Tyrosine Metabolism	0.183289	0.183289	0.775367	unchanged
Myo-Inositol	Lipid	Inositol Metabolism	0.568987	0.568987	0.343658	unchanged
Myristoleic Acid (C14:1n5)	Lipid	Long Chain Fatty Acid	0.110637	0.110637	0.861156	unchanged
Methylhistamine	Amino Acid	Histidine Metabolism	0.129933	0.129933	0.932108	unchanged
D-Ribose 5-Phosphate	Carbohydrate	Pentose phosphate pathway	0.0998796	0.0998796	0.964951	unchanged
Pentadecanoic Acid (C15:0)	Lipid	Long Chain Fatty Acid	0.072056	0.072056	1.06598	unchanged
Uridine	Nucleotide	Pyrimidine Metabolism, Uracil containing	0.941152	0.941152	0.0637378	unchanged
Pseudouridine	Nucleotide	Pyrimidine Metabolism, Uracil containing	0.145558	0.145558	0.827152	unchanged
2-Hydroxymyristate	Lipid	Fatty Acid, Monohydroxy	0.0857105	0.0857105	1.0713	unchanged
Glycerophosphoglycerol	Lipid	Glycerolipid and Phospholipid Metabolism	0.375181	0.375181	0.500126	unchanged
Hexadecadienoate (16:2n6)	Lipid	Long Chain Fatty Acid	0.543832	0.543832	0.3208	unchanged
Thymine	Nucleotide	Pyrimidine Metabolism, Thymine containing	0.0684921	0.0684921	1.07253	unchanged
Palmitoleic Acid (C16:1)	Lipid	Long Chain Fatty Acid	0.435229	0.435229	0.383661	unchanged
Glucosamine 6-Phosphate	Carbohydrate	Amino sugar and Nucleotide sugar Metabolism	0.0810396	0.0810396	1.03169	unchanged
Glucose 6-Phosphate/Fructose 6-Phosphate	Carbohydrate	Glycolysis, Gluconeogenesis, and Pyruvate Metabolism	0.899119	0.899119	0.0585925	unchanged
Phosphotyrosine	Amino Acid	Tyrosine Metabolism	0.768656	0.768656	0.139077	unchanged
1,3-Diphopshateglycerate/2,3-Diphopshateglycerate	Carbohydrate	Glycolysis, Gluconeogenesis, and Pyruvate Metabolism	0.52561	0.52561	0.300464	unchanged
Heptadecanoic Acid (C17:0)	Lipid	Long Chain Fatty Acid	0.153426	0.153426	0.842216	unchanged
Pyroglutamine	Amino Acid	Alanine, Aspartate and Glutamate Metabolism	0.641196	0.641196	0.247394	unchanged
6-Phosphogluconic Acid	Carbohydrate	Pentose phosphate pathway	0.75449	0.75449	0.143528	unchanged
Alpha/Gamma-Linolenic Acid (C18:3n3 or n6)	Lipid	Long Chain Fatty Acid	0.093384	0.093384	1.02978	unchanged
Linoleic Acid (C18:2n6)	Lipid	Long Chain Fatty Acid	0.129419	0.129419	0.799349	unchanged
Oleic Acid (C18:1)	Lipid	Long Chain Fatty Acid	0.474102	0.474102	0.342823	unchanged
Sedoheptulose 7-Phosphate	Carbohydrate	Pentose phosphate pathway	0.811901	0.811901	0.122662	unchanged
Tetradecylsulfate	Unclassified	Unclassified	0.907401	0.907401	0.1722	unchanged
Perfluorobutane Sulfonic Acid	Xenobiotics	Chemical	0.187347	0.187347	0.764008	unchanged
Pyroglutamic Acid	Amino Acid	Glutathione Metabolism	0.126825	0.126825	0.917693	unchanged
Eicosapentaenoic Acid (C20:5n3 EPA)	Lipid	Long Chain Fatty Acid	0.708572	0.708572	0.14086	unchanged
Eicosatrienoic Acid (C20:3n3)	Lipid	Long Chain Fatty Acid	0.240403	0.240403	0.592455	unchanged
Eicosadienoic Acid (C20:2n6)	Lipid	Long Chain Fatty Acid	0.252703	0.252703	0.633045	unchanged
N-Acetylneuraminic Acid	Carbohydrate	Amino sugar and Nucleotide sugar Metabolism	0.675502	0.675502	0.258942	unchanged
Mestranol	Unclassified	Unclassified	0.244277	0.244277	0.552143	unchanged
Eicosenoic Acid (C20:1)	Lipid	Long Chain Fatty Acid	0.968743	0.968743	0.0777995	unchanged
N-Methylproline	Amino Acid	Urea cycle; Arginine and Proline Metabolism	0.699237	0.699237	0.234035	unchanged
Docosahexaenoic Acid (C22:6n3 DHA)	Lipid	Long Chain Fatty Acid	0.566568	0.566568	0.24088	unchanged
Glycerophosphoinositol	Lipid	Glycerolipid and Phospholipid Metabolism	0.978126	0.978126	0.0484948	unchanged
Fructose 1,6-Bisphosphate	Carbohydrate	Glycolysis, Gluconeogenesis, and Pyruvate Metabolism	0.64371	0.64371	0.148292	unchanged
Canrenone	Xenobiotics	Drug	0.0851497	0.0851497	1.00892	unchanged
Sucrose	Carbohydrate	Polysaccharides and Oligosaccharides	0.974039	0.974039	0.063504	unchanged
dUDP	Nucleotide	Pyrimidine Metabolism, Uracil containing	0.456464	0.456464	0.491579	unchanged
dGDP	Nucleotide	Purine Metabolism, Guanine containing	0.0612546	0.0612546	1.03942	unchanged
Myo-Inositol-4-Phosphate	Lipid	Inositol Metabolism	0.457039	0.457039	0.374588	unchanged
Propionic acid	Unclassified	Unclassified	0.533642	0.533642	0.284827	unchanged
2-Hydroxybutyric Acid	Carbohydrate	Propanoate Metabolism	0.577876	0.577876	0.185034	unchanged
N-Acetylputrescine	Amino Acid	Polyamine Metabolism	0.84053	0.84053	0.137665	unchanged
3-Hydroxybutyric Acid	Lipid	Ketone Bodies	0.0707423	0.0707423	1.09948	unchanged
3-Methyl-2-Oxobutyrate	Amino Acid	Leucine, Isoleucine and Valine Metabolism	0.248308	0.248308	0.634341	unchanged
2-Hydroxyisovaleric acid	Amino Acid	Leucine, Isoleucine and Valine Metabolism	0.151445	0.151445	0.940963	unchanged
3-Hydroxyisovaleric Acid	Amino Acid	Leucine, Isoleucine and Valine Metabolism	0.261758	0.261758	0.723395	unchanged
Aminomalonic Acid	Amino Acid	Other Amino Acid Metabolism	0.479756	0.479756	0.335434	unchanged
Succinic Acid-D4(Neg_FA)	Unclassified	Unclassified	0.33806	0.33806	0.605185	unchanged
3-Methyl-2-Oxovaleric Acid	Amino Acid	Leucine, Isoleucine and Valine Metabolism	0.619229	0.619229	0.25899	unchanged
4-methyl-2-oxopentanoate	Amino Acid	Leucine, Isoleucine and Valine Metabolism	0.652443	0.652443	0.291191	unchanged
Propionylglycine	Lipid	Fatty Acid Metabolism (Acyl glycines)	0.514717	0.514717	0.374103	unchanged
Creatine	Amino Acid	Creatine Metabolism	0.673301	0.673301	0.307362	unchanged
Glutarate (C5-DC)	Lipid	Fatty Acid, Dicarboxylate	0.985422	0.985422	0.0526337	unchanged
L-Aspartic Acid	Amino Acid	Alanine, Aspartate and Glutamate Metabolism	0.821925	0.821925	0.161923	unchanged
Phenylacetic Acid	Amino Acid	Phenylalanine Metabolism	0.308645	0.308645	0.557494	unchanged
Salicylic acid	Xenobiotics	Drug	0.196368	0.196368	0.812327	unchanged
2-Hydroxyphenylacetic Acid	Amino Acid	Phenylalanine Metabolism	0.21817	0.21817	0.753764	unchanged
Pimelate (C7-DC)	Lipid	Fatty Acid, Dicarboxylate	0.915558	0.915558	0.0469254	unchanged
Phenylpyruvic Acid	Amino Acid	Phenylalanine Metabolism	0.142472	0.142472	0.876775	unchanged
Dimethyl Sulfoxide	Xenobiotics	Chemical	0.314673	0.314673	0.523769	unchanged
URIC ACID	Unclassified	Unclassified	0.122826	0.122826	0.903356	unchanged
Hexanoylglycine	Lipid	Fatty Acid Metabolism (Acyl glycines)	0.0605114	0.0605114	1.15633	unchanged
N-Acetylasparagine	Amino Acid	Alanine, Aspartate and Glutamate Metabolism	0.539941	0.539941	0.404243	unchanged
Suberate (C8-DC)	Lipid	Fatty Acid, Dicarboxylate	0.485344	0.485344	0.364614	unchanged
Succinylglycine	Lipid	Fatty Acid Metabolism (Acyl glycines)	0.929484	0.929484	0.0796176	unchanged
Cyclamate	Xenobiotics	Chemical	0.156779	0.156779	0.705847	unchanged
1-Methylurate	Xenobiotics	Xanthine Metabolism	0.0796144	0.0796144	1.02875	unchanged
L-Tyrosine-D4(Neg_FA)	Unclassified	Unclassified	0.195911	0.195911	0.802751	unchanged
Azelate (C9-DC)	Lipid	Fatty Acid, Dicarboxylate	0.961807	0.961807	0.0651676	unchanged
1,3-Dimethylurate	Xenobiotics	Xanthine Metabolism	0.270631	0.270631	0.584468	unchanged
Sebacate (C10-DC)	Lipid	Fatty Acid, Dicarboxylate	0.697661	0.697661	0.162995	unchanged
1,3,7-Trimethylurate	Xenobiotics	Xanthine Metabolism	0.759303	0.759303	0.079613	unchanged
Gly-His	Peptide	Dipeptide	0.317894	0.317894	0.605629	unchanged
5-Hydroxyindole Sulfate	Amino Acid	Tryptophan Metabolism	0.334703	0.334703	0.644977	unchanged
Undecanedioate (C11-DC)	Lipid	Fatty Acid, Dicarboxylate	0.360106	0.360106	0.61414	unchanged
Tyramine O-Sulfate	Amino Acid	Tyrosine Metabolism	0.451703	0.451703	0.518396	unchanged
Malonylglycine	Lipid	Fatty Acid Metabolism (Acyl glycines)	0.0528512	0.0528512	1.15635	unchanged
Gly-Tyr	Peptide	Dipeptide	0.152326	0.152326	0.853663	unchanged
N-Acetyltryptophan	Amino Acid	Tryptophan Metabolism	0.127626	0.127626	0.900911	unchanged
BETA-N-ACETYLGLUCOSAMINE	Unclassified	Unclassified	0.05689	0.05689	1.22803	unchanged
Lauroylglycine	Lipid	Fatty Acid Metabolism (Acyl glycines)	0.304332	0.304332	0.55914	unchanged
Trans-Cinnamaldehyde	Xenobiotics	Natural Product/Food/Plant	0.526353	0.526353	0.377353	unchanged
Phenol Glucuronide	Amino Acid	Tyrosine Metabolism	0.628694	0.628694	0.19331	unchanged
N-ACETYLNEURAMINATE	Unclassified	Unclassified	0.431126	0.431126	0.455513	unchanged
D-ORNITHINE	Unclassified	Unclassified	0.304939	0.304939	0.616407	unchanged
Tetrahydrocortisone 3-Glucuronide	Lipid	Corticosteroids	0.174199	0.174199	0.732165	unchanged
Adenine	Nucleotide	Purine Metabolism, Adenine containing	0.56711	0.56711	0.349211	unchanged
Hypoxanthine	Nucleotide	Purine Metabolism, (Hypo)Xanthine/Inosine containing	0.381272	0.381272	0.515474	unchanged
Trigonelline (N'-Methylnicotinate)	Cofactors and Vitamins	Nicotinate and Nicotinamide Metabolism	0.60192	0.60192	0.165513	unchanged
Urocanate	Amino Acid	Histidine Metabolism	0.890887	0.890887	0.0261664	unchanged
Ectoine	Xenobiotics	Natural Product/Food/Plant	0.0803758	0.0803758	0.980497	unchanged
4-Guanidinobutanoate	Amino Acid	Urea cycle; Arginine and Proline Metabolism	0.0601114	0.0601114	1.14423	unchanged
N-Methylleucine	Amino Acid	Leucine, Isoleucine and Valine Metabolism	0.719379	0.719379	0.220524	unchanged
N-Methylisoleucine	Amino Acid	Leucine, Isoleucine and Valine Metabolism	0.315519	0.315519	0.568394	unchanged
L-Lysine	Amino Acid	Lysine Metabolism	0.6276	0.6276	0.296725	unchanged
Guanine	Nucleotide	Purine Metabolism, Guanine containing	0.284851	0.284851	0.637289	unchanged
Methionine-D3	Unclassified	Unclassified	0.251889	0.251889	0.703534	unchanged
3-Hydroxyanthranilic Acid	Amino Acid	Tryptophan Metabolism	0.972114	0.972114	0.015343	unchanged
Homostachydrine	Xenobiotics	Natural Product/Food/Plant	0.327358	0.327358	0.661424	unchanged
Putrescine	Amino Acid	Polyamine Metabolism	0.0814812	0.0814812	1.07739	unchanged
N,N,N-Trimethyl-5-Aminovalerate	Amino Acid	Lysine Metabolism	0.868853	0.868853	0.102245	unchanged
N6-Methyllysine	Amino Acid	Lysine Metabolism	0.184968	0.184968	0.83862	unchanged
N-Acetylthreonine	Amino Acid	Glycine, Serine and Threonine Metabolism	0.260495	0.260495	0.727055	unchanged
Carnitine	Lipid	Fatty Acid Metabolism (Acyl Carnitine)	0.675207	0.675207	0.19238	unchanged
Carnitine-D3	Unclassified	Unclassified	0.125268	0.125268	0.881318	unchanged
L-Alanine	Amino Acid	Alanine, Aspartate and Glutamate Metabolism	0.0923845	0.0923845	1.02319	unchanged
Uric acid	Unclassified	Unclassified	0.132669	0.132669	0.883782	unchanged
Glycyl-proline; LC-tDDA; CE10	Unclassified	Unclassified	0.356564	0.356564	0.519457	unchanged
2-Oxoarginine	Amino Acid	Urea cycle; Arginine and Proline Metabolism	0.452701	0.452701	0.428202	unchanged
Indoleacetic Acid	Amino Acid	Tryptophan Metabolism	0.358575	0.358575	0.594239	unchanged
Citrulline	Amino Acid	Urea cycle; Arginine and Proline Metabolism	0.87341	0.87341	0.068652	unchanged
Alliin	Xenobiotics	Natural Product/Food/Plant	0.978357	0.978357	0.051954	unchanged
Cysteinylglycine	Amino Acid	Glutathione Metabolism	0.788093	0.788093	0.184309	unchanged
2-Aminopyridine	Xenobiotics	Chemical	0.080895	0.080895	0.987875	unchanged
L-Tyrosine	Amino Acid	Tyrosine Metabolism	0.0664047	0.0664047	1.05109	unchanged
Choline Phosphate	Lipid	Glycerolipid and Phospholipid Metabolism	0.342887	0.342887	0.500679	unchanged
Acisoga	Amino Acid	Polyamine Metabolism	0.319854	0.319854	0.54078	unchanged
L-Tyrosine-D4	Unclassified	Unclassified	0.315762	0.315762	0.622314	unchanged
Gly-Ile	Peptide	Dipeptide	0.0532551	0.0532551	1.12808	unchanged
N6,N6,N6-Trimethyllysine	Amino Acid	Lysine Metabolism	0.0313484	0.0313484	1.35215	up
Caffeine	Xenobiotics	Xanthine Metabolism	0.000556028	0.000556028	1.91661	up
Ala-Ile	Peptide	Dipeptide	0.0122092	0.0122092	1.37463	up
Dimethylarginine (SDMA + ADMA)	Amino Acid	Urea cycle; Arginine and Proline Metabolism	0.0437599	0.0437599	1.18403	up
L-Tryptophan	Amino Acid	Tryptophan Metabolism	0.00122976	0.00122976	1.80798	up
Indolelactate	Amino Acid	Tryptophan Metabolism	0.010101	0.010101	1.47592	up
1,3-Diphenylguanidine	Xenobiotics	Chemical	0.000150028	0.000150028	2.09115	up
Val-Val	Peptide	Dipeptide	0.013539	0.013539	1.39617	up
Ser-Ile	Peptide	Dipeptide	0.000352883	0.000352883	1.96924	up
Pantothenate	Cofactors and Vitamins	Pantothenate and CoA Metabolism	0.000949534	0.000949534	1.82779	up
Gly-Phe	Peptide	Dipeptide	0.0400816	0.0400816	1.14247	up
Phe-Gly	Peptide	Dipeptide	0.0137281	0.0137281	1.35218	up
Pro-Ile	Peptide	Dipeptide	0.0253919	0.0253919	1.26898	up
Ile-Val	Peptide	Dipeptide	0.000824358	0.000824358	1.78558	up
Ile-Leu	Peptide	Dipeptide	0.0405297	0.0405297	1.13831	up
Gamma-Glutamylvaline	Peptide	Gamma-glutamyl Amino Acid	0.00153685	0.00153685	1.7503	up
Gamma-Glutamylthreonine	Peptide	Gamma-glutamyl Amino Acid	6.52e-05	6.52e-05	2.17178	up
Guaiacol	Xenobiotics	Natural Product/Food/Plant	0.0108737	0.0108737	1.45895	up
Ser-Phe	Peptide	Dipeptide	0.0146189	0.0146189	1.37416	up
5-Methyluridine	Nucleotide	Pyrimidine Metabolism, Uracil containing	0.0408377	0.0408377	1.22639	up
Lys-Leu	Peptide	Dipeptide	0.00699839	0.00699839	1.50429	up
Lys-Ile	Peptide	Dipeptide	0.0422181	0.0422181	1.17252	up
Ile-Glu	Peptide	Dipeptide	0.0118739	0.0118739	1.41669	up
Gamma-Glutamylleucine	Peptide	Gamma-glutamyl Amino Acid	0.0126903	0.0126903	1.41248	up
Leu-Glu	Peptide	Dipeptide	0.0352178	0.0352178	1.20317	up
Gamma-Glutamylisoleucine	Peptide	Gamma-glutamyl Amino Acid	0.0164342	0.0164342	1.34395	up
Phe-Val	Peptide	Dipeptide	0.00157572	0.00157572	1.69057	up
Histamine	Amino Acid	Histidine Metabolism	0.00585738	0.00585738	1.54553	up
His-Leu	Peptide	Dipeptide	0.0339778	0.0339778	1.20603	up
His-Ile	Peptide	Dipeptide	0.00780188	0.00780188	1.48713	up
Gamma-Glutamylmethionine	Peptide	Gamma-glutamyl Amino Acid	0.0197937	0.0197937	1.38396	up
Asp-Phe	Peptide	Dipeptide	0.000433379	0.000433379	1.94551	up
Gamma-Glutamylphenylalanine	Peptide	Gamma-glutamyl Amino Acid	0.007573	0.007573	1.55015	up
Pyrrolidine	Xenobiotics	Natural Product/Food/Plant	0.00956108	0.00956108	1.47063	up
Leu-Trp	Peptide	Dipeptide	0.00521868	0.00521868	1.52443	up
Trp-Glu	Peptide	Dipeptide	0.000666365	0.000666365	1.90993	up
Cys-Gly, Oxidized	Amino Acid	Glutathione Metabolism	0.0212339	0.0212339	1.22191	up
C-Glycosyltryptophan	Amino Acid	Tryptophan Metabolism	0.0495061	0.0495061	1.08649	up
Gamma-Aminobutyric Acid	Amino Acid	Alanine, Aspartate and Glutamate Metabolism	0.00478723	0.00478723	1.6523	up
Glycerate	Carbohydrate	Glyoxylate and dicarboxylate metabolism	0.0010424	0.0010424	1.86492	up
4-Hydroxy-4-methyl-2-pentanone	Unclassified	Unclassified	0.0499484	0.0499484	1.15429	up
L-Norvaline	Amino Acid	Other Amino Acid Metabolism	0.0372037	0.0372037	1.21955	up
Taurine	Amino Acid	Methionine, Cysteine, SAM and Taurine Metabolism	0.00308829	0.00308829	1.67239	up
2-Hydroxycaproic Acid	Lipid	Fatty Acid, Monohydroxy	0.0106125	0.0106125	1.53206	up
Threonic Acid	Cofactors and Vitamins	Ascorbate and Aldarate Metabolism	0.0147649	0.0147649	1.36028	up
L-Threonine	Amino Acid	Glycine, Serine and Threonine Metabolism	0.0284871	0.0284871	1.26005	up
P-Coumaraldehyde	Xenobiotics	Natural Product/Food/Plant	0.0321209	0.0321209	1.2694	up
Cysteine sulfinic Acid	Amino Acid	Methionine, Cysteine, SAM and Taurine Metabolism	6.93e-06	6.93e-06	2.44051	up
PHENYLETHANOLAMINE	Unclassified	Unclassified	0.00639398	0.00639398	1.55279	up
Aminoadipic Acid	Amino Acid	Lysine Metabolism	0.0040639	0.0040639	1.70129	up
Phosphoserine	Amino Acid	Glycine, Serine and Threonine Metabolism	0.0325523	0.0325523	1.3293	up
Glucuronate	Carbohydrate	Amino sugar and Nucleotide sugar Metabolism	0.01635	0.01635	1.40291	up
1-Naphthalenesulfonate	Xenobiotics	Chemical	0.0137305	0.0137305	1.42832	up
Pentadecenoic Acid (C15:1n5)	Lipid	Long Chain Fatty Acid	0.0309077	0.0309077	1.19319	up
Lauryl Sulfate	Xenobiotics	Natural Product/Food/Plant	0.0480749	0.0480749	1.03936	up
Deoxyguanosine	Nucleotide	Purine Metabolism, Guanine containing	0.0124842	0.0124842	1.45306	up
Arachidonic Acid (C20:4n6)	Lipid	Long Chain Fatty Acid	0.00891573	0.00891573	1.4089	up
15-HEPE	Lipid	Eicosanoid	0.000575214	0.000575214	1.83871	up
TRANS-CINNAMATE	Unclassified	Unclassified	0.00789131	0.00789131	1.50973	up
5-Phosphoribosyl-1-Pyrophosphate	Nucleotide	Purine and Pyrimidine Metabolism	0.0424679	0.0424679	1.16438	up
TAURINE	Unclassified	Unclassified	0.000429065	0.000429065	1.93293	up
Alpha-Hydroxyisocaproate	Amino Acid	Leucine, Isoleucine and Valine Metabolism	0.00417853	0.00417853	1.67028	up
3-Methylindole	Xenobiotics	Natural Product/Food/Plant	0.0201871	0.0201871	1.31879	up
Phenyllactic Acid	Amino Acid	Phenylalanine Metabolism	0.0137171	0.0137171	1.42446	up
N-Carbamoyl-L-Aspartate	Nucleotide	Purine and Pyrimidine Metabolism	0.00196174	0.00196174	1.77343	up
L-Leucine	Amino Acid	Leucine, Isoleucine and Valine Metabolism	0.00372424	0.00372424	1.64045	up
Homovanillic Acid	Amino Acid	Tyrosine Metabolism	0.0487395	0.0487395	1.07798	up
Glutarylglycine	Lipid	Fatty Acid Metabolism (Acyl glycines)	0.00158024	0.00158024	1.73995	up
L-Isoleucine	Amino Acid	Leucine, Isoleucine and Valine Metabolism	0.00316702	0.00316702	1.64487	up
1-Methylpseudouridine	Xenobiotics	Natural Product/Food/Plant	0.00128806	0.00128806	1.79173	up
Tyrosine O-sulfate	Amino Acid	Tyrosine Metabolism	0.00163126	0.00163126	1.67687	up
N-Acetylglucosamine 1-phosphate	Carbohydrate	Amino sugar and Nucleotide sugar Metabolism	0.00235647	0.00235647	1.76193	up
Glycochenodeoxycholic Acid	Lipid	Bile Acid, glycine conjungate	0.0135775	0.0135775	1.36885	up
P-Octopamine	Xenobiotics	Natural Product/Food/Plant	0.030309	0.030309	1.22481	up
Piperidine	Xenobiotics	Natural Product/Food/Plant	0.00404909	0.00404909	1.61981	up
2-Naphthylamine	Xenobiotics	Natural Product/Food/Plant	0.00865888	0.00865888	1.48073	up
3-Formylindole	Xenobiotics	Natural Product/Food/Plant	0.00398191	0.00398191	1.62163	up
Acetylcholine	Lipid	Fatty Acid Metabolism (Acyl Choline)	0.0254492	0.0254492	1.36521	up
Spermidine	Amino Acid	Polyamine Metabolism	0.00261978	0.00261978	1.74924	up
Coumaric acid (isomer of 192, 194)	Unclassified	Unclassified	0.0443623	0.0443623	1.14673	up
2-Methylpyrrolidine	Xenobiotics	Natural Product/Food/Plant	0.00224383	0.00224383	1.68489	up
L-Glutamine	Amino Acid	Alanine, Aspartate and Glutamate Metabolism	0.0207668	0.0207668	1.3752	up
L-Glutamic Acid	Amino Acid	Alanine, Aspartate and Glutamate Metabolism	0.00974415	0.00974415	1.51003	up
Cinnamic Acid	Amino Acid	Phenylalanine Metabolism	0.00925997	0.00925997	1.47638	up
L-Methionine	Amino Acid	Methionine, Cysteine, SAM and Taurine Metabolism	0.0245086	0.0245086	1.26547	up
Ala-Ala	Peptide	Dipeptide	0.00568367	0.00568367	1.55191	up
P-Coumaric Acid	Amino Acid	Tyrosine Metabolism	0.044236	0.044236	1.14776	up
L-Phenylalanine	Amino Acid	Phenylalanine Metabolism	0.007687	0.007687	1.52222	up
Hordenine	Xenobiotics	Natural Product/Food/Plant	0.0133727	0.0133727	1.41337	up
3-Methylxanthine	Xenobiotics	Xanthine Metabolism	0.0402334	0.0402334	1.14421	up
N-Alpha-Acetylornithine	Amino Acid	Urea cycle; Arginine and Proline Metabolism	0.00503748	0.00503748	1.65005	up
Guanidinosuccinic Acid	Amino Acid	Urea cycle; Arginine and Proline Metabolism	0.00617899	0.00617899	1.53708	up
Paraxanthine	Xenobiotics	Xanthine Metabolism	0.000425488	0.000425488	1.96043	up
Theobromine	Xenobiotics	Xanthine Metabolism	0.0102777	0.0102777	1.43742	up
TRYPTOPHAN	Unclassified	Unclassified	0.00127042	0.00127042	1.80175	up
Gly-Leu	Peptide	Dipeptide	0.00740116	0.00740116	1.52008	up
N6-Acetyllysine	Amino Acid	Lysine Metabolism	0.000709227	0.000709227	1.90904	up

## Sheet: KEGG Enrichment of ecc
Terms	mapping	Fold enrich	p.value	fdr
Alanine, aspartate and glutamate metabolism	5	1.15	0.447	1
Arginine and proline metabolism	5	1.24	0.372	1
Arginine biosynthesis	5	1.62	0.16	1
Ascorbate and aldarate metabolism	2	1.29	0.493	1
beta-Alanine metabolism	3	0.97	0.648	1
Biosynthesis of unsaturated fatty acids	4	1.17	0.459	1
Butanoate metabolism	2	0.81	0.77	1
Caffeine metabolism	4	1.85	0.134	1
Citrate cycle (TCA cycle)	2	0.81	0.77	1
Cysteine and methionine metabolism	3	0.81	0.779	1
D-Amino acid metabolism	7	1.13	0.427	1
Fatty acid biosynthesis	3	1.21	0.474	1
Glutathione metabolism	2	1.08	0.604	1
Glycine, serine and threonine metabolism	4	0.99	0.615	1
Glyoxylate and dicarboxylate metabolism	5	1.15	0.447	1
Histidine metabolism	3	1.21	0.474	1
Lysine degradation	3	1.21	0.474	1
Nitrogen metabolism	2	3.23	0.0945	1
Pentose phosphate pathway	2	0.92	0.696	1
Phenylalanine, tyrosine and tryptophan biosynthesis	3	1.21	0.474	1
Primary bile acid biosynthesis	3	2.42	0.0885	1
Purine metabolism	5	1.01	0.59	1
Pyrimidine metabolism	6	1.21	0.368	1
Taurine and hypotaurine metabolism	3	1.38	0.374	1
Tryptophan metabolism	2	1.08	0.604	1
Tyrosine metabolism	3	1.08	0.566	1
Valine, leucine and isoleucine biosynthesis	4	1.29	0.374	1
Valine, leucine and isoleucine degradation	2	1.08	0.604	1

## Sheet: MSEA Enrichment of ecc
Terms	NES	p.value	Count
Alanine, aspartate and glutamate metabolism	-1.29	0.198	14
Arginine and proline metabolism	1.05	0.296	13
Arginine biosynthesis	0.684	0.494	10
beta-Alanine metabolism	1.9	0.058	10
Biosynthesis of unsaturated fatty acids	0.465	0.642	11
Butanoate metabolism	0.978	0.328	8
Caffeine metabolism	3.09	0.002	7
Citrate cycle (TCA cycle)	-2.75	0.006	8
Cysteine and methionine metabolism	1.77	0.076	12
D-Amino acid metabolism	0.415	0.678	20
Fatty acid biosynthesis	-1.72	0.086	8
Galactose metabolism	1.06	0.29	6
Glutathione metabolism	1.27	0.204	6
Glycerophospholipid metabolism	-1.48	0.14	7
Glycine, serine and threonine metabolism	1.15	0.25	13
Glycolysis / Gluconeogenesis	0.69	0.49	6
Glyoxylate and dicarboxylate metabolism	-2.75	0.006	14
Histidine metabolism	2.41	0.016	8
Lipoic acid metabolism	-1.72	0.086	8
Lysine degradation	0.732	0.464	8
Nicotinate and nicotinamide metabolism	0.665	0.506	8
Pantothenate and CoA biosynthesis	0.782	0.434	8
Pentose phosphate pathway	1.1	0.272	7
Phenylalanine metabolism	0.375	0.708	10
Phenylalanine, tyrosine and tryptophan biosynthesis	0.749	0.454	8
Purine metabolism	-1.98	0.048	16
Pyrimidine metabolism	-2.58	0.01	16
Pyruvate metabolism	-2.23	0.026	7
Taurine and hypotaurine metabolism	1.77	0.076	7
Tryptophan metabolism	0.678	0.498	6
Tyrosine metabolism	-1.09	0.274	9
Valine, leucine and isoleucine biosynthesis	0.919	0.358	10
Valine, leucine and isoleucine degradation	2.23	0.026	6

## Sheet: speciese vs metabolites
Terms	mapping	Fold enrich	p.value	fdr	Metabolites	regulation
Alanine, aspartate and glutamate metabolism	3	0.73	0.838	1	Glucosamine 6-Phosphate ; Oxoglutaric Acid ; Citric Acid	down
Arginine and proline metabolism	2	0.52	0.938	1	L-Arginine ; Urea	down
Arginine biosynthesis	3	1.02	0.605	1	Urea ; Oxoglutaric Acid ; L-Arginine	down
Ascorbate and aldarate metabolism	2	1.36	0.459	1	Myo-Inositol ; Oxoglutaric Acid	down
Biosynthesis of unsaturated fatty acids	5	1.55	0.189	1	Arachidonic Acid (C20:4n6) ; Eicosapentaenoic Acid (C20:5n3 EPA) ; Alpha/Gamma-Linolenic Acid (C18:3n3 or n6) ; Linoleic Acid (C18:2n6) ; Arachidate (C20:0)	down
Biotin metabolism	2	2.27	0.206	1	Urea ; L-Lysine	down
Citrate cycle (TCA cycle)	3	1.28	0.432	1	Citric Acid ; Oxoglutaric Acid ; Aconitic Acid	down
Cysteine and methionine metabolism	4	1.14	0.489	1	1-Aminocyclopropane-1-Carboxylate ; Alpha-Ketobutyrate ; Phosphoserine ; 3-Sulfo-L-Alanine	down
D-Amino acid metabolism	6	1.02	0.565	1	L-Lysine ; Phenylpyruvic Acid ; L-Histidine ; Glycine ; L-Arginine ; Oxoglutaric Acid	down
Fatty acid biosynthesis	3	1.28	0.432	1	Palmitoleic Acid (C16:1) ; Octanoic Acid (C8:0) ; Dodecanoic Acid (C12:0)	down
Galactose metabolism	2	1.14	0.569	1	Myo-Inositol ; Glyceraldehyde 3-Phosphate	down
Glycine, serine and threonine metabolism	5	1.31	0.321	1	Glycine ; Phosphoserine ; Hydroxypyruvic Acid ; Alpha-Ketobutyrate ; Glycerate	down
Glyoxylate and dicarboxylate metabolism	7	1.7	0.075	1	Aconitic Acid ; Glycine ; Citric Acid ; Glycerate ; Oxoglutaric Acid ; Hydroxypyruvic Acid ; Tartaric Acid	down
Histidine metabolism	2	0.85	0.738	1	Oxoglutaric Acid ; L-Histidine	down
Inositol phosphate metabolism	2	1.36	0.459	1	Glyceraldehyde 3-Phosphate ; Myo-Inositol	down
Linoleic acid metabolism	2	2.27	0.206	1	Linoleic Acid (C18:2n6) ; Arachidonic Acid (C20:4n6)	down
Lipoic acid metabolism	4	1.7	0.177	1	Octanoic Acid (C8:0) ; Oxoglutaric Acid ; Glycine ; 3-Methyl-2-Oxobutyrate	down
Lysine degradation	3	1.28	0.432	1	Glycine ; Oxoglutaric Acid ; L-Lysine	down
Pentose phosphate pathway	3	1.46	0.336	1	Glyceraldehyde 3-Phosphate ; Glycerate ; D-Gluconic Acid	down
Phenylalanine, tyrosine and tryptophan biosynthesis	2	0.85	0.738	1	Phenylpyruvic Acid ; 4-Hydroxyphenylpyruvic Acid	down
Primary bile acid biosynthesis	2	1.7	0.336	1	Glycine ; Taurochenodeoxycholic Acid	down
Propanoate metabolism	2	1.36	0.459	1	2-Hydroxybutyric Acid ; Alpha-Ketobutyrate	down
Purine metabolism	6	1.28	0.312	1	AMP ; Guanine ; Guanosine ; dGDP ; Urea ; Glycine	down
Pyrimidine metabolism	7	1.49	0.149	1	Pseudouridine ; CDP ; Cytidine ; Uridine ; dCMP ; Urea ; Cytosine	down
Taurine and hypotaurine metabolism	2	0.97	0.662	1	3-Sulfo-L-Alanine ; Oxoglutaric Acid	down
Thiamine metabolism	2	1.7	0.336	1	Glyceraldehyde 3-Phosphate ; Glycine	down
Valine, leucine and isoleucine biosynthesis	3	1.02	0.605	1	Alpha-Ketobutyrate ; 3-Methyl-2-Oxobutyrate ; Citraconic Acid	down
Alanine, aspartate and glutamate metabolism	3	0.99	0.617	1	N-Carbamoyl-L-Aspartate ; Gamma-Aminobutyric Acid ; L-Glutamic Acid	up
Amino sugar and nucleotide sugar metabolism	2	2.32	0.203	1	Glucuronate ; N-Acetyl-D-Glucosamine	up
Arginine and proline metabolism	4	1.43	0.297	1	Spermidine ; L-Glutamic Acid ; Gamma-Aminobutyric Acid ; Creatine	up
Arginine biosynthesis	2	0.93	0.677	1	L-Glutamic Acid ; N-Alpha-Acetylornithine	up
beta-Alanine metabolism	3	1.39	0.369	1	Pantothenate ; Gamma-Aminobutyric Acid ; Spermidine	up
Butanoate metabolism	2	1.16	0.546	1	Gamma-Aminobutyric Acid ; L-Glutamic Acid	up
Caffeine metabolism	2	1.33	0.468	1	Xanthosine ; 1-Methylurate	up
Cysteine and methionine metabolism	3	1.16	0.5	1	N-Formylmethionine ; Phosphoserine ; Cysteine sulfinic Acid	up
D-Amino acid metabolism	3	0.7	0.855	1	L-Glutamic Acid ; Ala-Ala ; L-Threonine	up
Fatty acid biosynthesis	2	1.16	0.546	1	Octanoic Acid (C8:0) ; Palmitoleic Acid (C16:1)	up
Glutathione metabolism	3	2.32	0.115	1	Spermidine ; Cysteinylglycine ; L-Glutamic Acid	up
Glycine, serine and threonine metabolism	4	1.43	0.297	1	Creatine ; Phosphoserine ; Glycerate ; L-Threonine	up
Glyoxylate and dicarboxylate metabolism	2	0.66	0.85	1	Glycerate ; L-Glutamic Acid	up
Histidine metabolism	4	2.32	0.0668	1	Methylhistamine ; 5-Phosphoribosyl-1-Pyrophosphate ; Histamine ; L-Glutamic Acid	up
Lysine degradation	3	1.74	0.235	1	N6-Acetyllysine ; N6,N6,N6-Trimethyllysine ; Aminoadipic Acid	up
Pentose phosphate pathway	2	1.33	0.468	1	5-Phosphoribosyl-1-Pyrophosphate ; Glycerate	up
Purine metabolism	3	0.87	0.716	1	Xanthosine ; Deoxyadenosine ; 5-Phosphoribosyl-1-Pyrophosphate	up
Pyrimidine metabolism	4	1.16	0.467	1	dUDP ; N-Carbamoyl-L-Aspartate ; Pseudouridine ; 5-Phosphoribosyl-1-Pyrophosphate	up
Taurine and hypotaurine metabolism	3	1.99	0.172	1	Cysteine sulfinic Acid ; L-Glutamic Acid ; Taurine	up
Valine, leucine and isoleucine biosynthesis	3	1.39	0.369	1	L-Threonine ; L-Isoleucine ; L-Leucine	up
Valine, leucine and isoleucine degradation	2	1.55	0.383	1	L-Leucine ; L-Isoleucine	up
