# Supplementary material for: Polymicrobial detection and salivary metabolomics of children with early childhood caries
Source: PeerJ. 2025 May 6;13:e19399. doi: 10.7717/peerj.19399 (PMC12063607; doi:10.7717/peerj.19399)
Supplement: Supplemental Information 2 [file peerj-13-19399-s002.xls]

## Sheet: Sheet1
Original Text	Translation
男	Male
女	Female
